# Supplementary material for: A rule to distinguish diastereomeric bianthrones by 1H NMR
Source: Royal Society of Chemistry journal article supplement (doi:10.1039/c3ra47055e), 2014-01-01
Supplement: c3ra47055e.pdf [file c3ra47055e.pdf]

## Supplementary information

### A rule to distinguish diastereomeric bianthrones by $^1\text{H}$ NMR

Nai-Yun Ji,<sup>\*a</sup> Xiao-Rui Liang,<sup>a,b,c</sup> Ran-Ran Sun<sup>a,b</sup> and Feng-Ping Miao<sup>a</sup>

<sup>a</sup>*Key Laboratory of Coastal Biology and Bioresource Utilization, Yantai Institute of Coastal Zone Research, Chinese Academy of Sciences, Yantai 264003, China. E-mail address: nyji@yic.ac.cn; Tel: +86 535 2109176*

<sup>b</sup>*University of Chinese Academy of Sciences, Beijing 100049, China*

<sup>c</sup>*Naval Aeronautical and Astronautical University, Yantai 264001, China*

## Table of Contents

- S6, **Figure S1.** Relationship between relative free energy ( $\Delta G$ ) and dihedral angle ( $\angle\text{H-10-C-10-C-10}'\text{-H-10}'$ , 0–360°) of 1,1',8,8'-tetrahydroxybianthrone with conformers being produced by rotating the vicinal lowest-energy gauche or anti form;
- S7, **Figure S2.** Experimental and calculated differences of  $^1\text{H}$  NMR shifts for chrysophanol bianthrone (**1**);
- S8, **Figure S3.** Differences of the calculated  $^1\text{H}$  NMR data for *cis* (*meso*) and *trans* chrysophanol bianthrone (**1**);
- S9, **Figure S4.** Experimental and calculated differences of  $^1\text{H}$  NMR shifts for emodin bianthrone (**2**);
- S10, **Table S1.** Calculated degrees for the dihedral angles  $\angle\text{H-10-C-10-C-10}'\text{-H-10}'$  at the gas-phase B3LYP/6-31G(d) level;
- S11, **Table S2.** Calculated  $^1\text{H}$  NMR data for the conformers of *cis* (*meso*) and *trans* chrysophanol bianthrone (**1**);
- S12,  $^1\text{H}$  NMR spectrum of compound **3a** in  $\text{CDCl}_3$ ;
- S13,  $^{13}\text{C}$  NMR and DEPT spectra of compound **3a** in  $\text{CDCl}_3$ ;
- S14, HSQC spectrum of compound **3a** in  $\text{CDCl}_3$ ;
- S15, HMBC spectrum of compound **3a** in  $\text{CDCl}_3$ ;
- S16,  $^1\text{H}$ - $^1\text{H}$  COSY spectrum of compound **3a** in  $\text{CDCl}_3$ ;
- S17, NOESY spectrum of compound **3a** in  $\text{CDCl}_3$ ;
- S18,  $^1\text{H}$  NMR spectrum of compound **3b/c** in  $\text{CDCl}_3$ ;
- S19, Cartesian coordinates of gauche-1 form of 1,1',8,8'-tetrahydroxybianthrone optimized at the gas-phase B3LYP/6-31G(d) level;
- S20, Cartesian coordinates of gauche-2 form of 1,1',8,8'-tetrahydroxybianthrone optimized at the gas-phase B3LYP/6-31G(d) level;
- S21, Cartesian coordinates of anti form of 1,1',8,8'-tetrahydroxybianthrone optimized at the gas-phase B3LYP/6-31G(d) level;
- S22, Cartesian coordinates of **1-I** optimized at the gas-phase B3LYP/6-31G(d) level;

- S23, Cartesian coordinates of **1-II** optimized at the gas-phase B3LYP/6-31G(d) level;
- S24, Cartesian coordinates of **1-III** optimized at the gas-phase B3LYP/6-31G(d) level;
- S25, Cartesian coordinates of **1-IV** optimized at the gas-phase B3LYP/6-31G(d) level;
- S26, Cartesian coordinates of anti form of **1a** optimized at the gas-phase B3LYP/6-31G(d) level;
- S27, Cartesian coordinates of anti form of **1b** optimized at the gas-phase B3LYP/6-31G(d) level;
- S28, Cartesian coordinates of **2-I** optimized at the gas-phase B3LYP/6-31G(d) level;
- S29, Cartesian coordinates of **2-II** optimized at the gas-phase B3LYP/6-31G(d) level;
- S30, Cartesian coordinates of **2-III** optimized at the gas-phase B3LYP/6-31G(d) level;
- S31, Cartesian coordinates of **2-IV** optimized at the gas-phase B3LYP/6-31G(d) level;
- S32, Cartesian coordinates of **3-I** optimized at the gas-phase B3LYP/6-31G(d) level;
- S33, Cartesian coordinates of **3-II** optimized at the gas-phase B3LYP/6-31G(d) level;
- S34, Cartesian coordinates of **3-III** optimized at the gas-phase B3LYP/6-31G(d) level;
- S35, Cartesian coordinates of **3-IV** optimized at the gas-phase B3LYP/6-31G(d) level;
- S36, Cartesian coordinates of **4-I** optimized at the gas-phase B3LYP/6-31G(d) level;
- S37, Cartesian coordinates of **4-II** optimized at the gas-phase B3LYP/6-31G(d) level;
- S38, Cartesian coordinates of **4-III** optimized at the gas-phase B3LYP/6-31G(d) level;
- S39, Cartesian coordinates of **4-IV** optimized at the gas-phase B3LYP/6-31G(d) level;
- S40, Cartesian coordinates of **5-I** optimized at the gas-phase B3LYP/6-31G(d) level;
- S41, Cartesian coordinates of **5-II** optimized at the gas-phase B3LYP/6-31G(d) level;
- S42, Cartesian coordinates of **5-III** optimized at the gas-phase B3LYP/6-31G(d) level;
- S43, Cartesian coordinates of **5-IV** optimized at the gas-phase B3LYP/6-31G(d) level;
- S41, Cartesian coordinates of 1,1'-acetylated **5-I** optimized at the gas-phase B3LYP/6-31G(d) level;
- S45, Cartesian coordinates of 1,1'-acetylated **5-II** optimized at the gas-phase B3LYP/6-31G(d)  
level;
- S46, Cartesian coordinates of 1,1'-acetylated **5-III** optimized at the gas-phase B3LYP/6-31G(d)  
level;
- S47, Cartesian coordinates of 1,1'-acetylated **5-IV** optimized at the gas-phase B3LYP/6-31G(d)  
level;
- S48, Cartesian coordinates of 3,3'-dicarboxyl-1,1',8,8'-tetrahydroxybianthrone-I optimized at the  
gas-phase B3LYP/6-31G(d) level;

- S49, Cartesian coordinates of 3,3'-dicarboxyl-1,1',8,8'-tetrahydroxybianthrone-II optimized at the gas-phase B3LYP/6-31G(d) level;
- S50, Cartesian coordinates of 3,3'-dicarboxyl-1,1',8,8'-tetrahydroxybianthrone-III optimized at the gas-phase B3LYP/6-31G(d) level;
- S51, Cartesian coordinates of 3,3'-dicarboxyl-1,1',8,8'-tetrahydroxybianthrone-IV optimized at the gas-phase B3LYP/6-31G(d) level;
- S52, Cartesian coordinates of **9-I** optimized at the gas-phase B3LYP/6-31G(d) level;
- S53, Cartesian coordinates of **9-II** optimized at the gas-phase B3LYP/6-31G(d) level;
- S54, Cartesian coordinates of **9-III** optimized at the gas-phase B3LYP/6-31G(d) level;
- S55, Cartesian coordinates of **9-IV** optimized at the gas-phase B3LYP/6-31G(d) level;
- S56, Cartesian coordinates of 7,7'-methylated **1-I** optimized at the gas-phase B3LYP/6-31G(d) level;
- S57, Cartesian coordinates of 7,7'-methylated **1-II** optimized at the gas-phase B3LYP/6-31G(d) level;
- S58, Cartesian coordinates of 7,7'-methylated **1-III** optimized at the gas-phase B3LYP/6-31G(d) level;
- S59, Cartesian coordinates of 7,7'-methylated **1-IV** optimized at the gas-phase B3LYP/6-31G(d) level;
- S60, Cartesian coordinates of 7,7'-methylated **2-I** optimized at the gas-phase B3LYP/6-31G(d) level;
- S61, Cartesian coordinates of 7,7'-methylated **2-II** optimized at the gas-phase B3LYP/6-31G(d) level;
- S62, Cartesian coordinates of 7,7'-methylated **2-III** optimized at the gas-phase B3LYP/6-31G(d) level;
- S63, Cartesian coordinates of 7,7'-methylated **2-IV** optimized at the gas-phase B3LYP/6-31G(d) level;
- S64, Cartesian coordinates of **12-I** optimized at the gas-phase B3LYP/6-31G(d) level;
- S65, Cartesian coordinates of **12-II** optimized at the gas-phase B3LYP/6-31G(d) level;
- S66, Cartesian coordinates of **12-III** optimized at the gas-phase B3LYP/6-31G(d) level;
- S67, Cartesian coordinates of **12-IV** optimized at the gas-phase B3LYP/6-31G(d) level;

S68, Cartesian coordinates of **13-I** optimized at the gas-phase B3LYP/6-31G(d) level;  
S69, Cartesian coordinates of **13-II** optimized at the gas-phase B3LYP/6-31G(d) level;  
S70, Cartesian coordinates of **13-III** optimized at the gas-phase B3LYP/6-31G(d) level;  
S71, Cartesian coordinates of **13-IV** optimized at the gas-phase B3LYP/6-31G(d) level;  
S72, Cartesian coordinates of **14-I** optimized at the gas-phase B3LYP/6-31G(d) level;  
S73, Cartesian coordinates of **14-II** optimized at the gas-phase B3LYP/6-31G(d) level;  
S74, Cartesian coordinates of **14-III** optimized at the gas-phase B3LYP/6-31G(d) level;  
S75, Cartesian coordinates of **14-IV** optimized at the gas-phase B3LYP/6-31G(d) level;  
S76, Cartesian coordinates of **15-I** optimized at the gas-phase B3LYP/6-31G(d) level;  
S77, Cartesian coordinates of **15-II** optimized at the gas-phase B3LYP/6-31G(d) level;  
S78, Cartesian coordinates of **15-III** optimized at the gas-phase B3LYP/6-31G(d) level;  
S79, Cartesian coordinates of **15-IV** optimized at the gas-phase B3LYP/6-31G(d) level;  
S80, Cartesian coordinates of **16-I** optimized at the gas-phase B3LYP/6-31G(d) level;  
S81, Cartesian coordinates of **16-II** optimized at the gas-phase B3LYP/6-31G(d) level;  
S82, Cartesian coordinates of **16-III** optimized at the gas-phase B3LYP/6-31G(d) level;  
S83, Cartesian coordinates of **16-IV** optimized at the gas-phase B3LYP/6-31G(d) level;  
S84, Cartesian coordinates of **17-I** optimized at the gas-phase B3LYP/6-31G(d) level;  
S85, Cartesian coordinates of **17-II** optimized at the gas-phase B3LYP/6-31G(d) level;  
S86, Cartesian coordinates of **17-III** optimized at the gas-phase B3LYP/6-31G(d) level;  
S87, Cartesian coordinates of **17-IV** optimized at the gas-phase B3LYP/6-31G(d) level;  
S88, Cartesian coordinates of 5-chlorinated **1-I** optimized at the gas-phase B3LYP/6-31G(d) level;  
S89, Cartesian coordinates of 5-chlorinated **1-II** optimized at the gas-phase B3LYP/6-31G(d) level;  
S90, Cartesian coordinates of 5-chlorinated **1-III** optimized at the gas-phase B3LYP/6-31G(d) level;  
S91, Cartesian coordinates of 5-chlorinated **1-IV** optimized at the gas-phase B3LYP/6-31G(d) level.

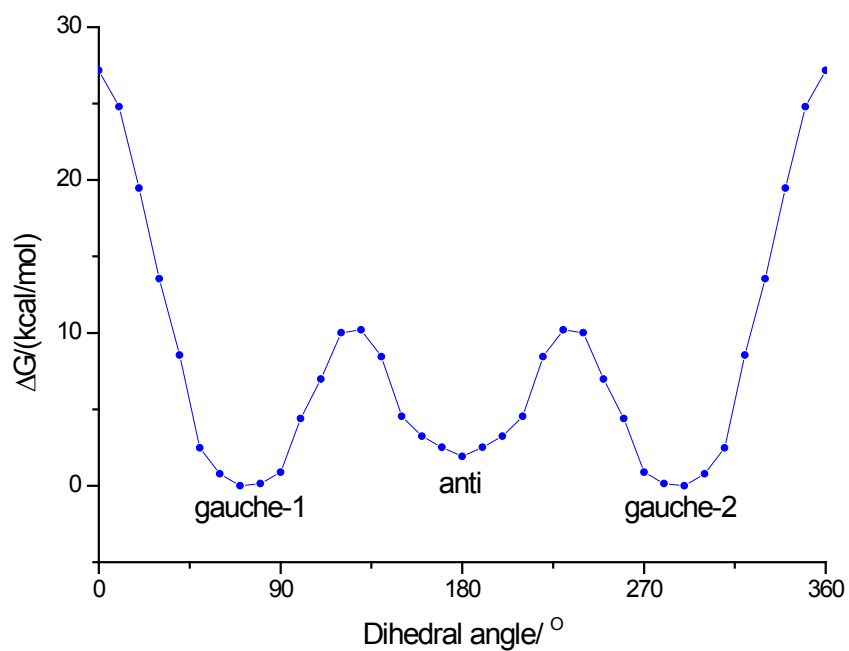

**Figure S1.** Relationship between relative free energy ( $\Delta G$ ) and dihedral angle ( $\angle\text{H-10-C-10-C-10}'\text{-H-10}'$ , 0–360°) of 1,1',8,8'-tetrahydroxybianthrone with conformers being produced by rotating the vicinal lowest-energy gauche or anti form.

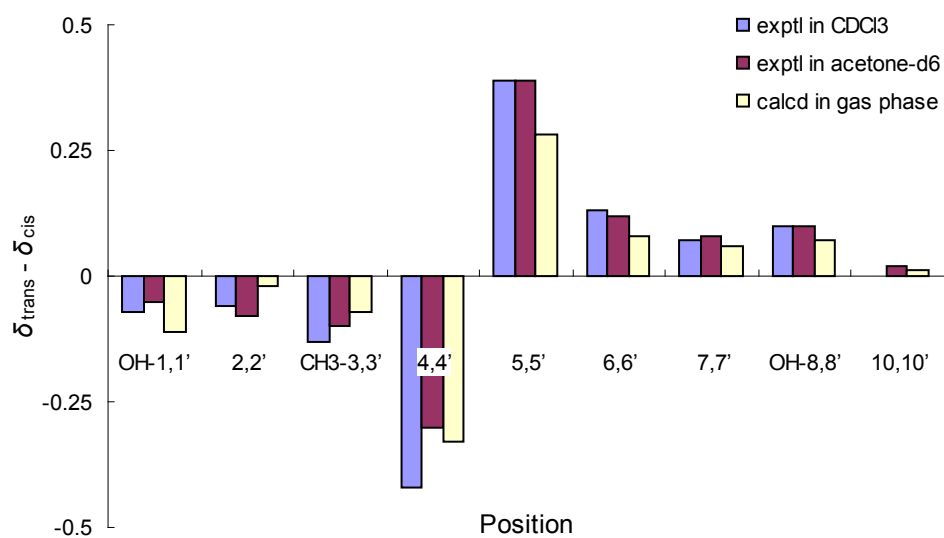

**Figure S2.** Experimental and calculated differences of  $^1\text{H}$  NMR shifts for chrysophanol bianthrone (1).

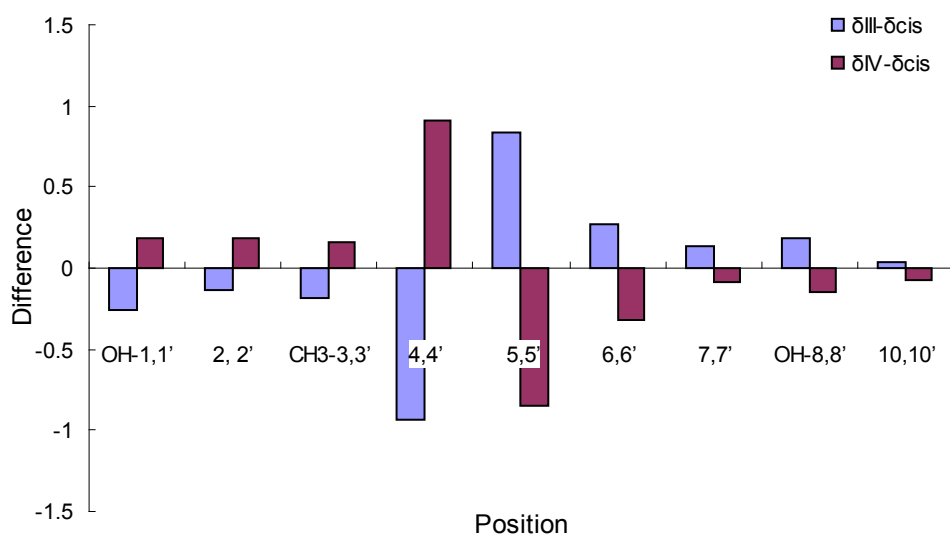

**Figure S3.** Differences of the calculated <sup>1</sup>H NMR data for *cis* (*meso*) and *trans* chrysophanol bianthrone (1).



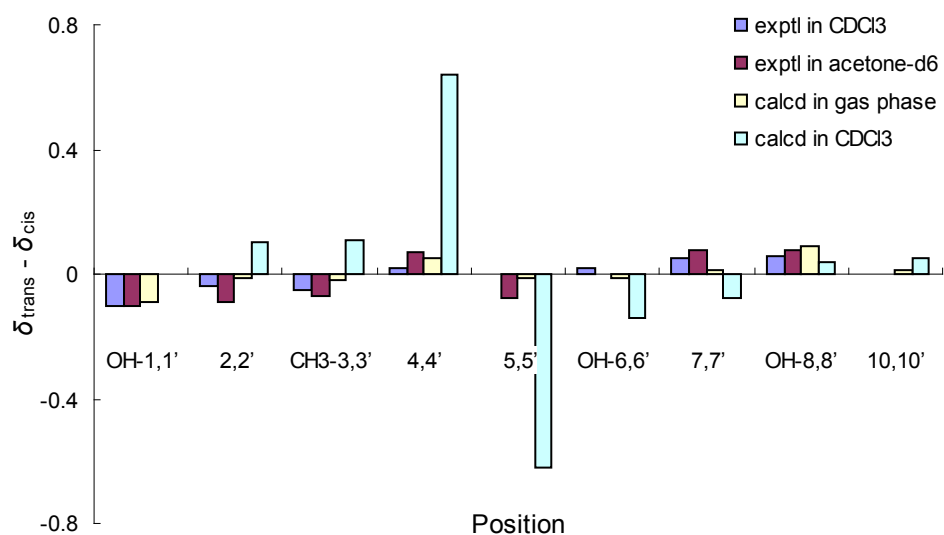

**Figure S4.** Experimental and calculated differences of  $^1\text{H}$  NMR shifts for emodin bianthrone (2).

**Table S1.** Calculated degrees for the dihedral angles  $\angle\text{H-10-C-10-C-10}'\text{-H-10}'$  at the gas-phase B3LYP/6-31G(d) level<sup>a</sup>

| 1,1'             | 2,2' | 3,3'            | 5,5' | 6,6'                | 7,7'               | 8,8'             | I/°  | II/° | III/° | IV/° |
|------------------|------|-----------------|------|---------------------|--------------------|------------------|------|------|-------|------|
| OH               | H    | H               | H    | H                   | H                  | OH               |      | 71.9 |       |      |
| OCH <sub>3</sub> | H    | CH <sub>3</sub> | H    | OH                  | H                  | OH               | 76.5 | 76.5 | 70.8  | 69.3 |
| OCH <sub>3</sub> | H    | CH <sub>3</sub> | Cl   | OH                  | H                  | OH               | 73.0 | 73.0 | 55.3  | 69.3 |
| OAc              | H    | CH <sub>3</sub> | H    | OCH <sub>3</sub>    | H                  | OCH <sub>3</sub> | 72.5 | 72.5 | 79.0  | 68.3 |
| OH               | COOH | CH <sub>3</sub> | H    | OH                  | H                  | OH               | 71.7 | 71.7 | 71.2  | 70.1 |
| OH               | H    | CH <sub>3</sub> | H    | H                   | H                  | OH               | 71.6 | 71.6 | 70.8  | 72.0 |
| OH               | H    | CH <sub>3</sub> | Cl   | H                   | H                  | OH               | 71.5 | 71.5 | 54.6  | 72.6 |
| OH               | H    | CH <sub>3</sub> | H    | OH                  | H                  | OH               | 71.2 | 71.2 | 71.0  | 71.6 |
| OH               | H    | CH <sub>3</sub> | H    | OH                  | CH <sub>3</sub>    | OH               | 71.3 | 71.3 | 70.9  | 71.3 |
| OH               | H    | CH <sub>3</sub> | H    | OCH <sub>3</sub>    | H                  | OH               | 71.4 | 71.4 | 70.7  | 72.1 |
| OH               | H    | CH <sub>3</sub> | H    | OCH <sub>3</sub>    | H                  | OCH <sub>3</sub> | 73.6 | 73.6 | 78.1  | 71.6 |
| OH               | H    | CH <sub>3</sub> | H    | H                   | CH <sub>3</sub>    | OH               | 71.7 | 71.7 | 71.1  | 71.3 |
| OH               | H    | CH <sub>3</sub> | H    | H                   | OCH <sub>3</sub>   | OH               | 71.1 | 71.1 | 70.7  | 70.4 |
| OH               | H    | COOH            | H    | H                   | H                  | OH               | 71.7 | 71.7 | 70.4  | 69.7 |
| OH               | H    | CH <sub>3</sub> | Cl,H | H                   | H                  | OH               | 69.6 | 74.8 | 70.0  | 74.5 |
| OH               | H    | CH <sub>3</sub> | H    | H,OH                | H                  | OH               | 71.8 | 71.5 | 72.0  | 71.9 |
| OH               | H    | CH <sub>3</sub> | H    | H,OCH <sub>3</sub>  | H                  | OH               | 72.0 | 72.2 | 72.1  | 71.8 |
| OH               | H    | CH <sub>3</sub> | H    | OH,OCH <sub>3</sub> | H                  | OH               | 72.3 | 71.9 | 71.9  | 72.6 |
| OH               | H    | CH <sub>3</sub> | H    | H                   | H,OCH <sub>3</sub> | OH               | 70.7 | 72.0 | 71.5  | 71.8 |

<sup>a</sup>Without groups at 4/4' and 10/10' positions.

**Table S2.** Calculated  $^1\text{H}$  NMR data for the conformers of *cis* (*meso*) and *trans* chrysophanol bianthrone (**1**)

| pos.                | $\delta_{\text{I}}$ | $\delta_{\text{II}}$ | $\delta_{\text{III}}$ | $\delta_{\text{IV}}$ |
|---------------------|---------------------|----------------------|-----------------------|----------------------|
| OH-1                | 12.21               | 12.34                | 12.02                 | 12.47                |
| 2                   | 6.83                | 7.19                 | 6.88                  | 7.20                 |
| CH <sub>3</sub> -3  | 2.16                | 2.48                 | 2.13                  | 2.48                 |
| 4                   | 5.38                | 7.28                 | 5.39                  | 7.25                 |
| 5                   | 7.38                | 5.68                 | 7.37                  | 5.67                 |
| 6                   | 7.80                | 7.25                 | 7.79                  | 7.21                 |
| 7                   | 7.18                | 6.92                 | 7.19                  | 6.97                 |
| OH-8                | 12.49               | 12.08                | 12.46                 | 12.13                |
| 10                  | 4.53                | 4.62                 | 4.62                  | 4.51                 |
| OH-1'               | 12.34               | 12.21                | 12.02                 | 12.47                |
| 2'                  | 7.20                | 6.83                 | 6.88                  | 7.20                 |
| CH <sub>3</sub> -3' | 2.48                | 2.16                 | 2.13                  | 2.48                 |
| 4'                  | 7.28                | 5.38                 | 5.39                  | 7.25                 |
| 5'                  | 5.68                | 7.38                 | 7.37                  | 5.67                 |
| 6'                  | 7.25                | 7.80                 | 7.79                  | 7.21                 |
| 7'                  | 6.92                | 7.18                 | 7.19                  | 6.97                 |
| OH-8'               | 12.08               | 12.49                | 12.47                 | 12.13                |
| 10'                 | 4.62                | 4.53                 | 4.62                  | 4.50                 |

<sup>1</sup>H NMR

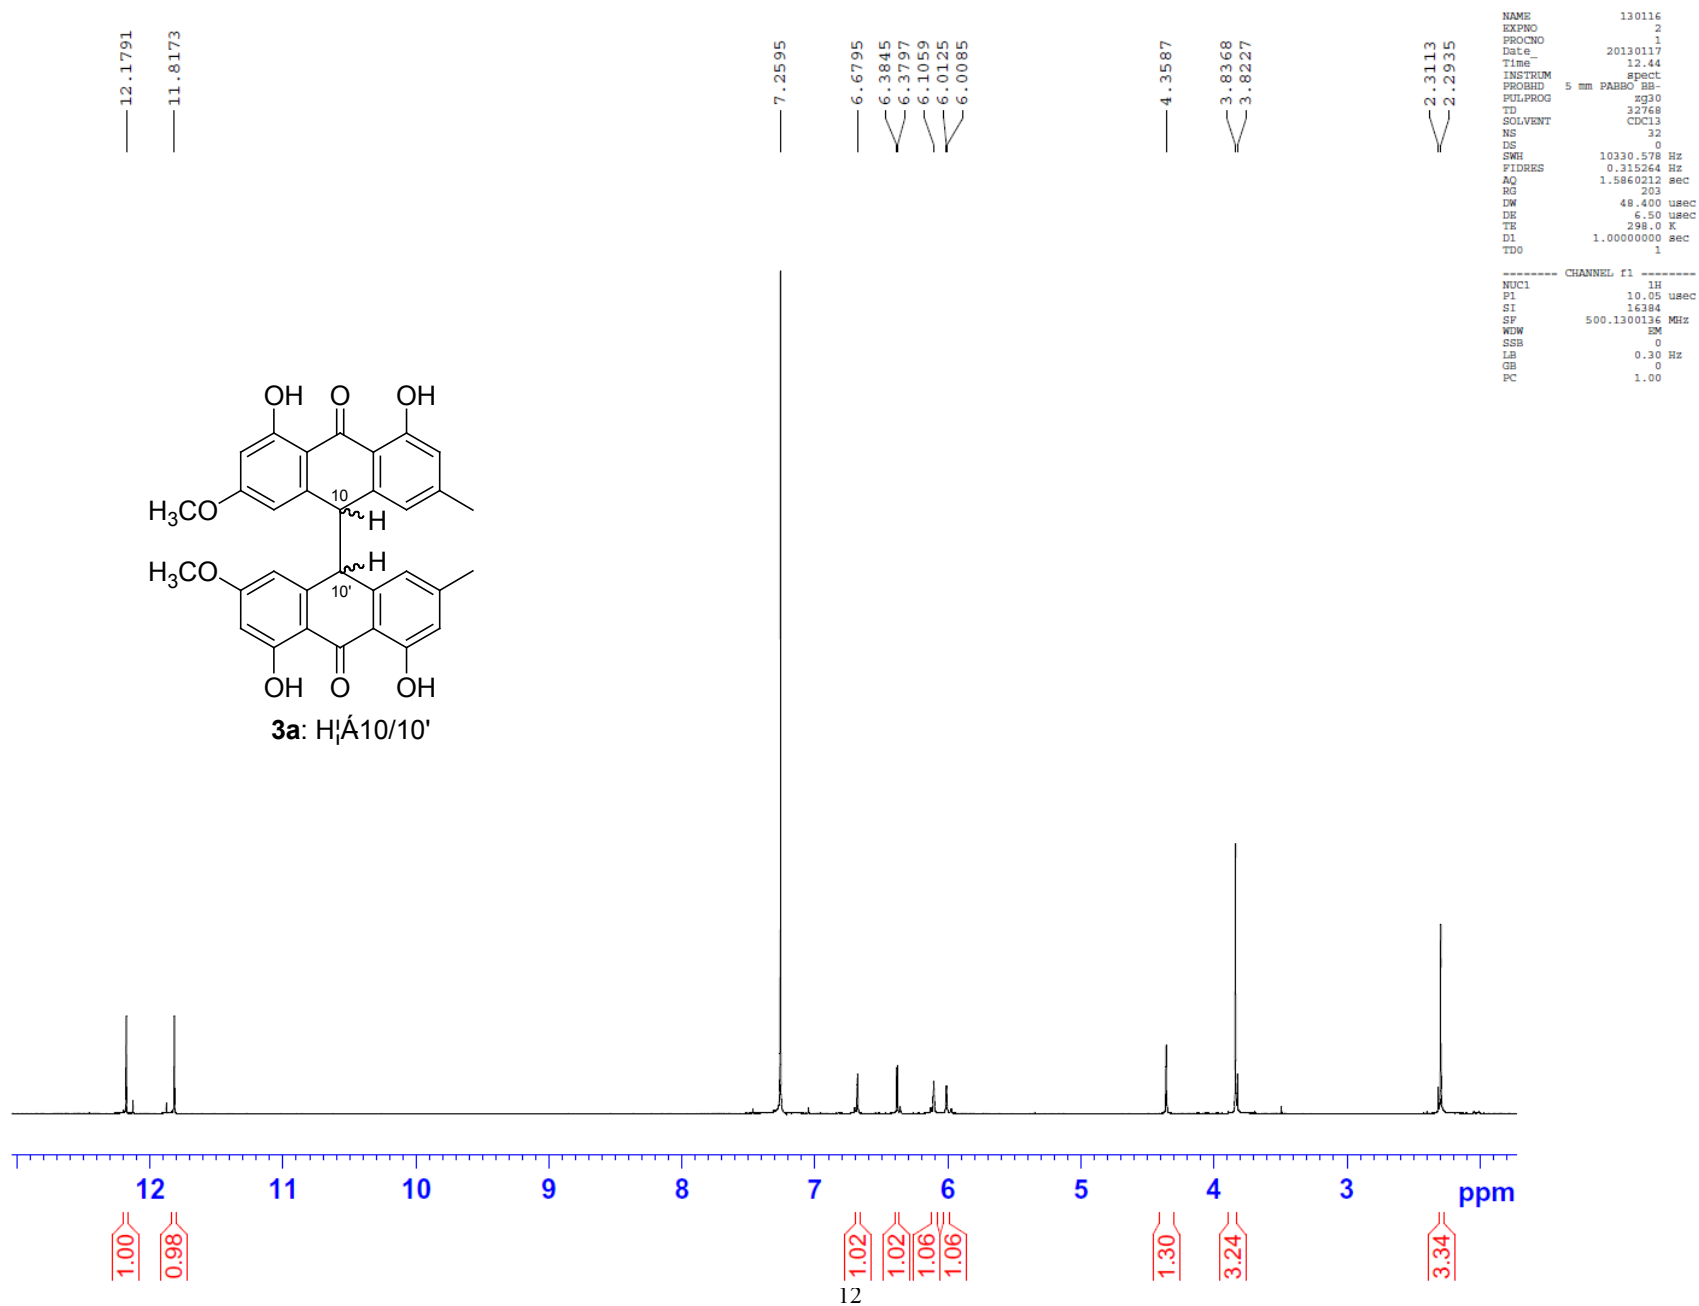

<sup>13</sup>C NMR and DEPT

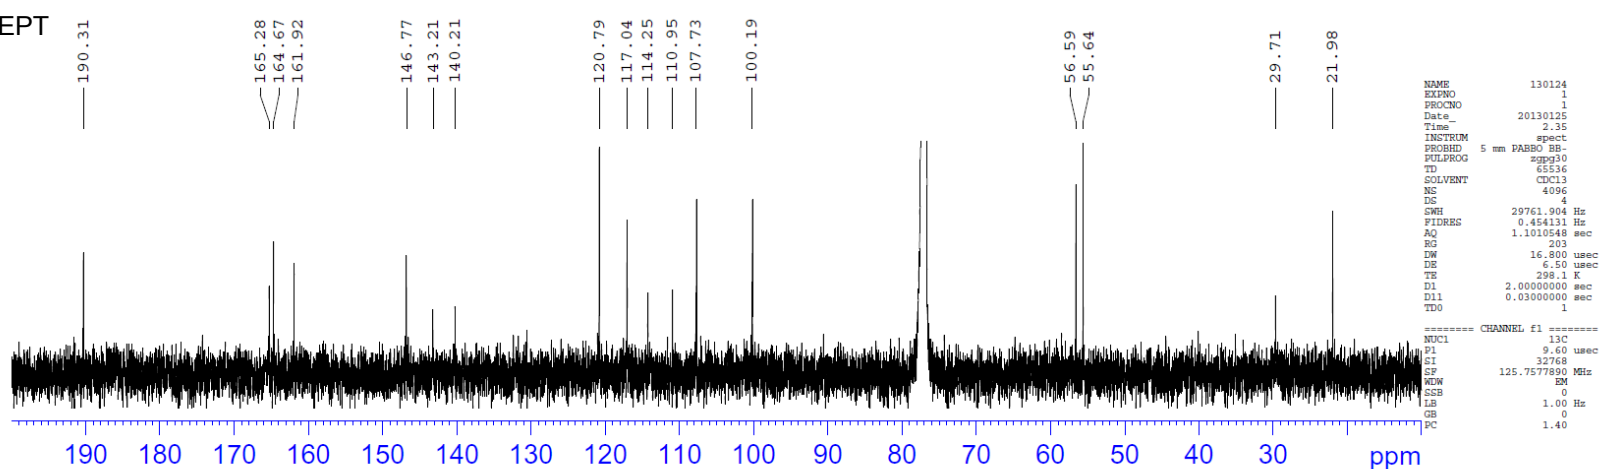

dept 90

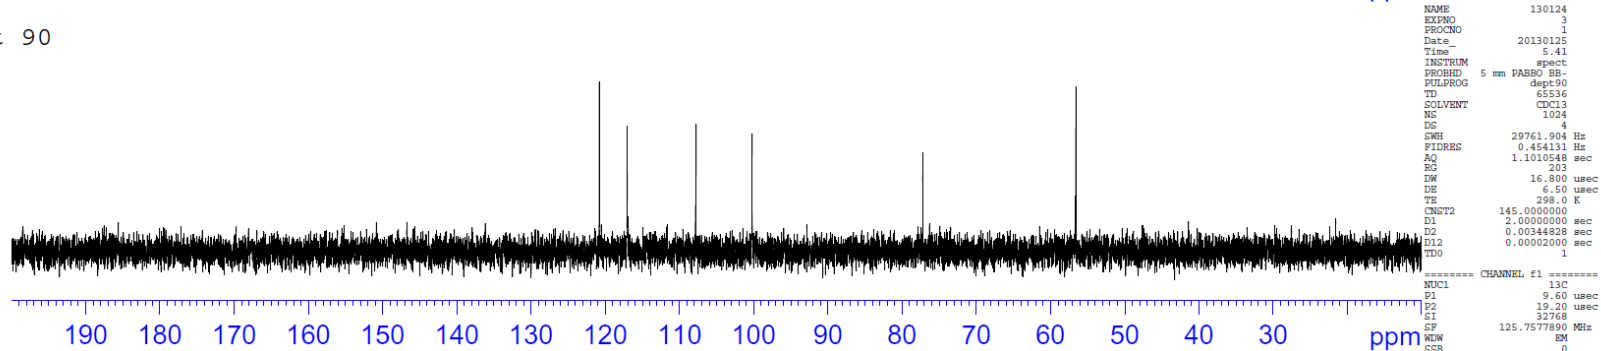

dept 135

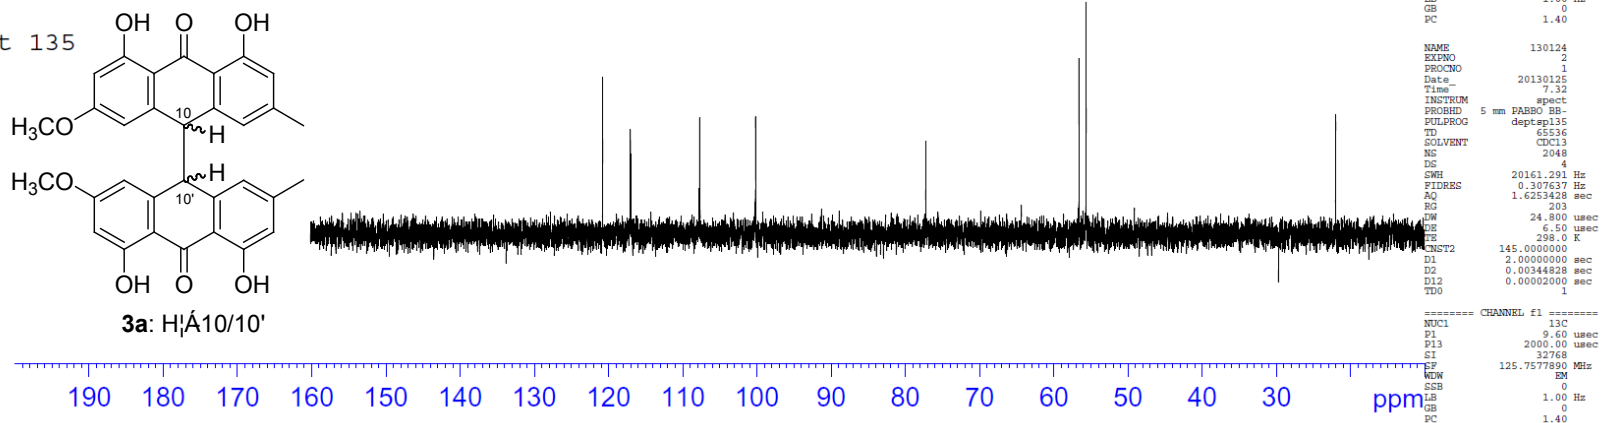

HSQC

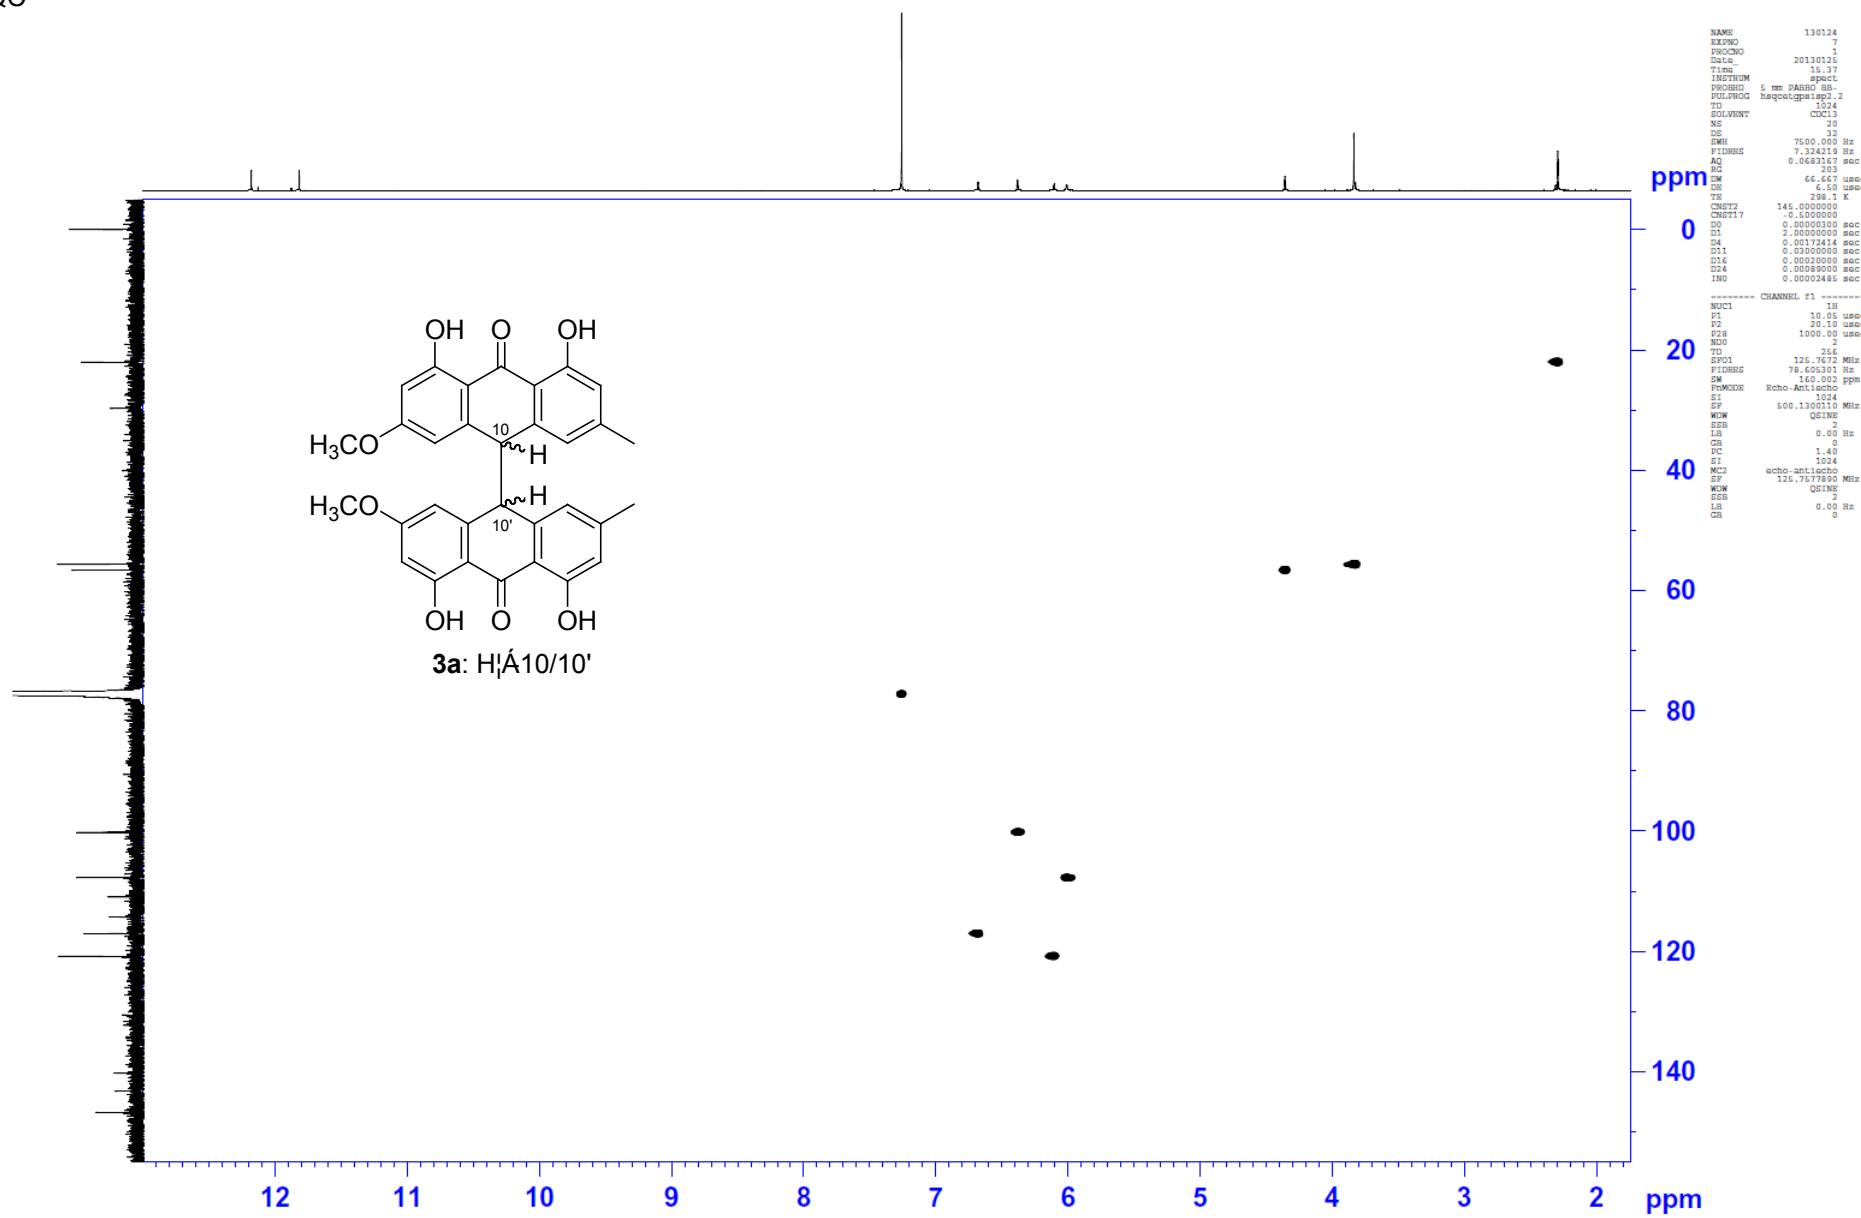

HMBC

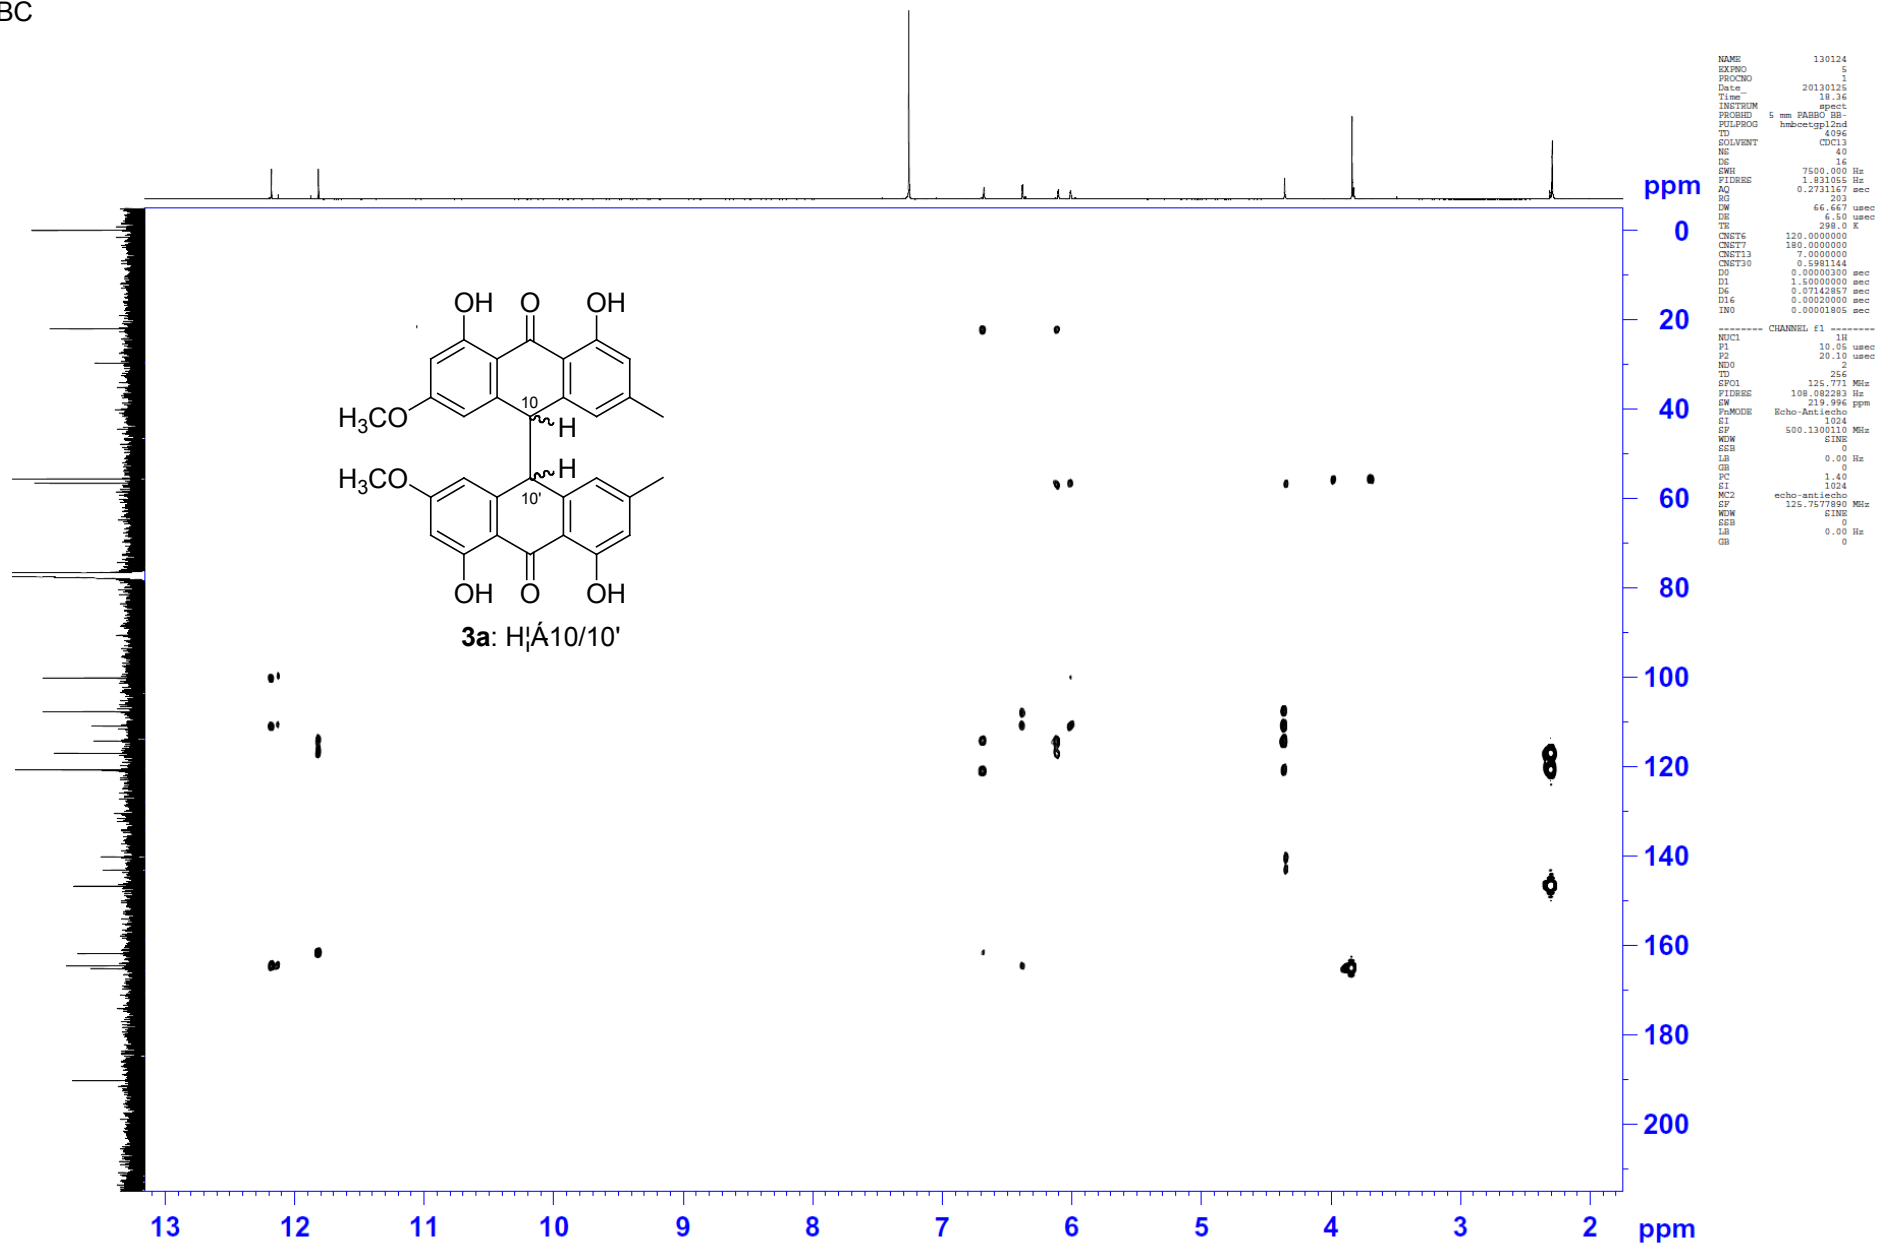

$^1\text{H}$ - $^1\text{H}$  COSY

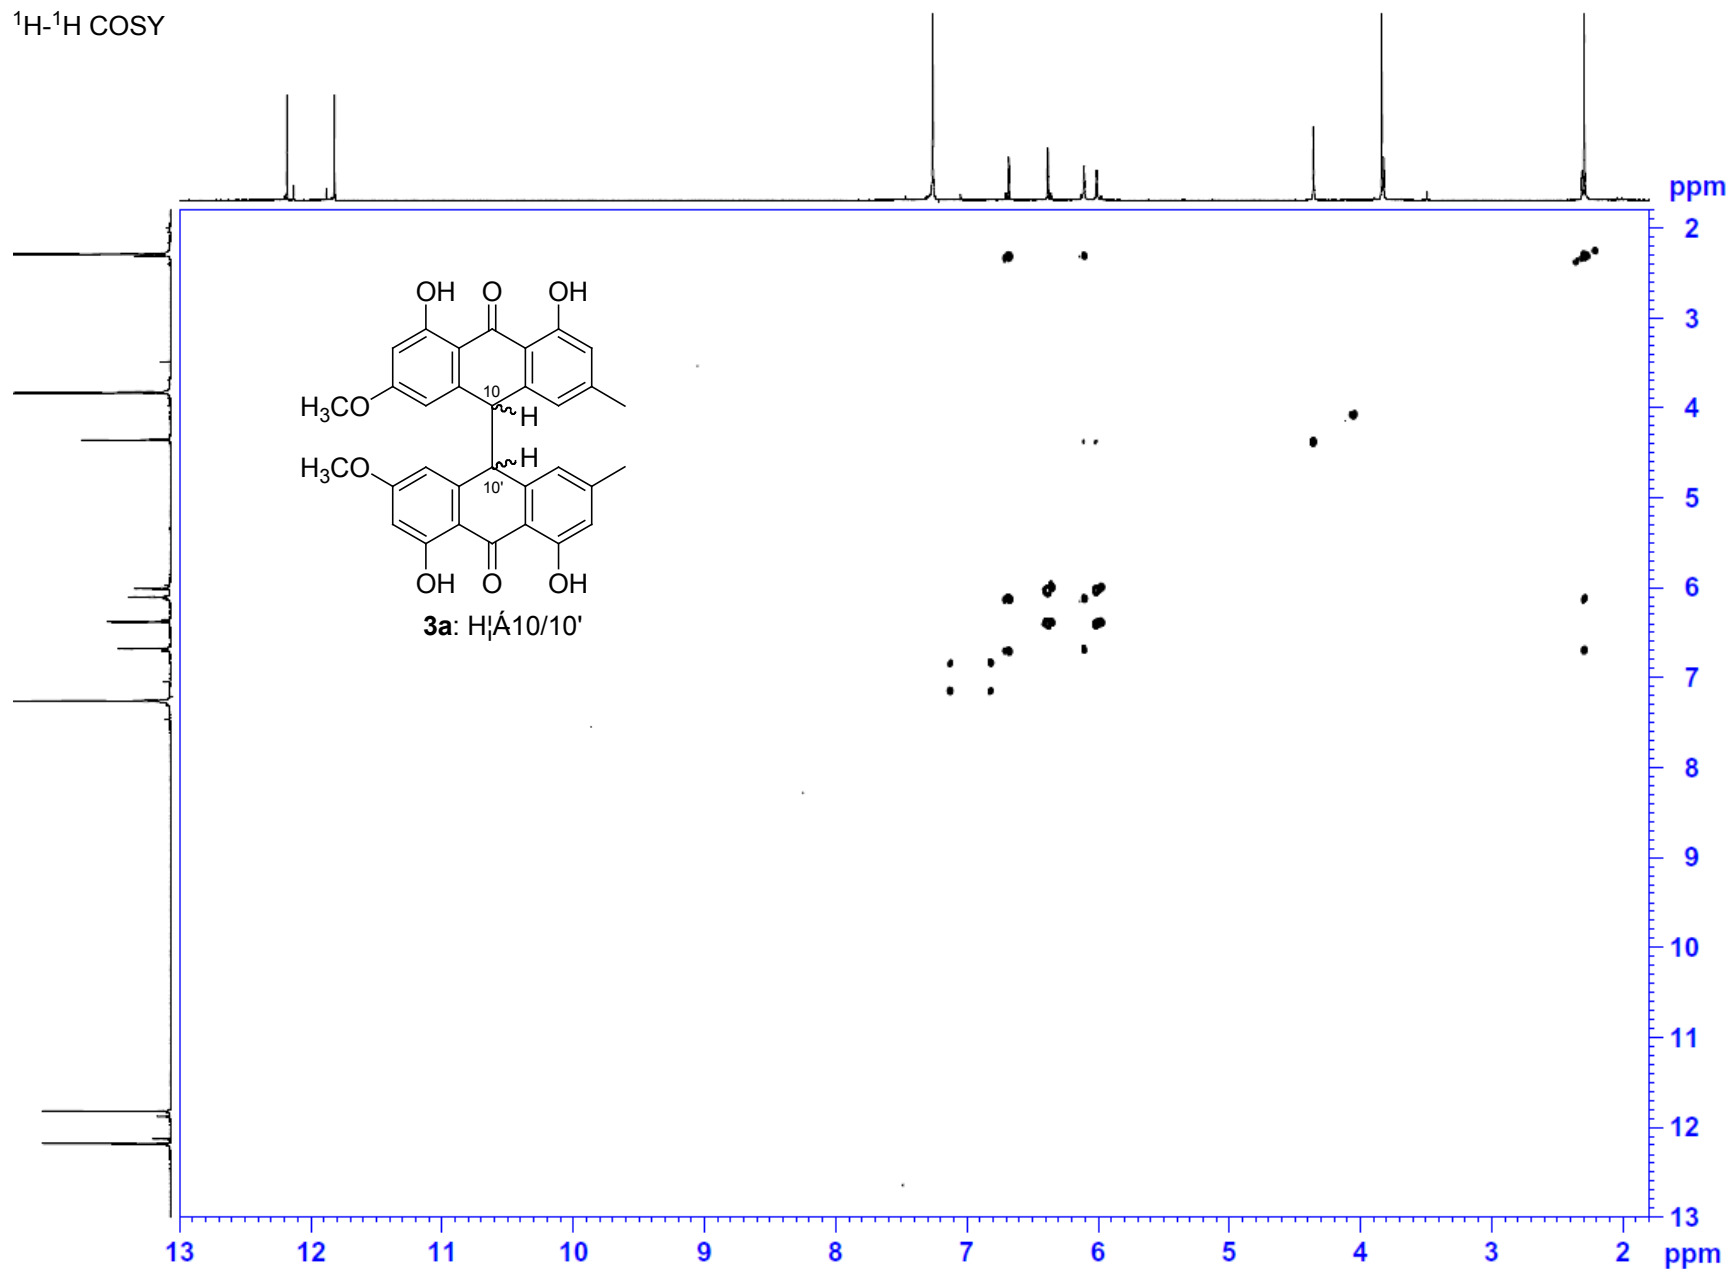

NAME 130124  
EXPNO 4  
PROCNO 1  
Date\_ 20130126  
Time 0.26  
INSTRUM spect  
PROBHD 5 mm PAIRBO SE-  
PULPROG zgpg30  
TD 65536  
SOLVENT CDCl<sub>3</sub>  
NS 0  
DS 0  
SWH 7000.000 Hz  
FIDRES 1.642100 Hz  
AQ 0.1364833 sec  
RG 200  
SQ 46.467 usec  
RG 6.50 usec  
TE 299.0 K  
NUC1 0.00000000 usec  
NUC2 0.00000000 usec  
DIL1 0.00000400 usec  
DIL2 0.00000000 usec  
DIL3 0.00000000 usec  
DIL4 0.00013330 usec  
DIL5 0.00013330 usec

===== CHANNEL f1 =====  
NUC1 1H  
P1 10.00 usec  
NUC2 13C  
P2 20.00 usec  
SFO1 500.1326 MHz  
FIDRES 29.304400 Hz  
SW 15.000 ppm  
FREQH0 0P  
SI 1024  
SF 500.1300100 MHz  
WDW EM  
SSB 0  
LBI 0.00 Hz  
GB 0  
PC 1.40  
SI 1024  
MC 0P  
SF 500.1300000 MHz  
WDW EM  
SSB 0  
LBI 0.00 Hz  
GB 0



NOESY

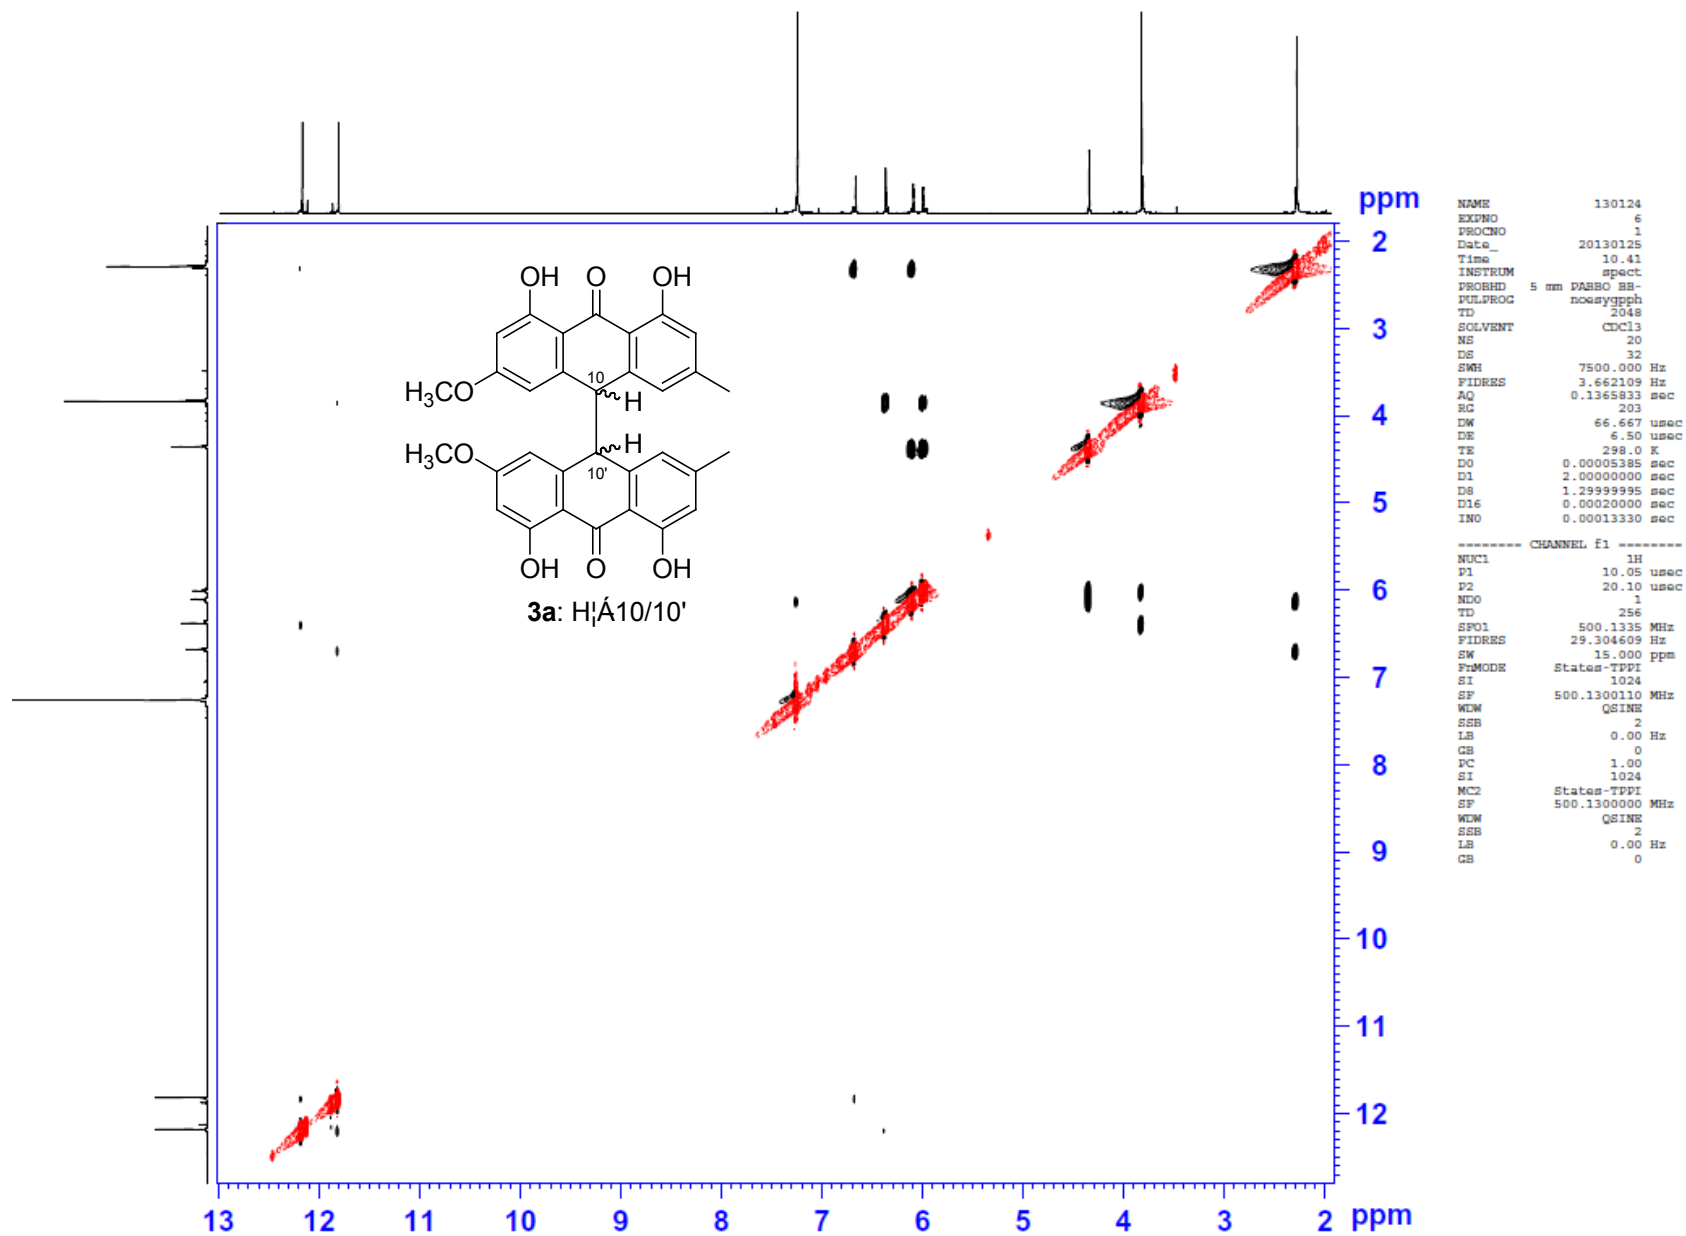

<sup>1</sup>H NMR

12.1262  
 11.8750

7.2594  
 6.6992  
 6.3601  
 6.3554  
 6.1252  
 5.9749  
 5.9709

4.3474  
 3.8215  
 3.4911

2.3102

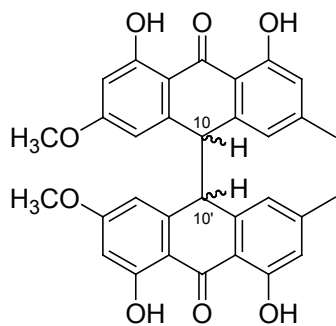

**3b:** H<sub>1</sub>Å10/H<sub>1</sub>Å10'  
**3c:** H<sub>1</sub>Å10/H<sub>1</sub>Å10'

```

NAME      130128
EXPNO     1
PROCNO    1
Date_     20130120
Time      13.14
INSTRUM   spect
PROBHD    5 mm PABBO BH-
PULPROG   zg30
TD         65536
SOLVENT   CDCl3
NS         8
DS         0
SWH        10330.378 Hz
FIDRES     0.315264 Hz
AQ         1.5860212 sec
RG         303
IN         48.400 usec
DE         6.50 usec
TE         298.0 K
D1         1.00000000 sec
TD0        1

===== CHANNEL f1 =====
NUC1       1H
P1         10.00 usec
SFO        500.1300137 MHz
RG         304
SH         0
LB         0.30 Hz
GB         0
PC         1.00
    
```

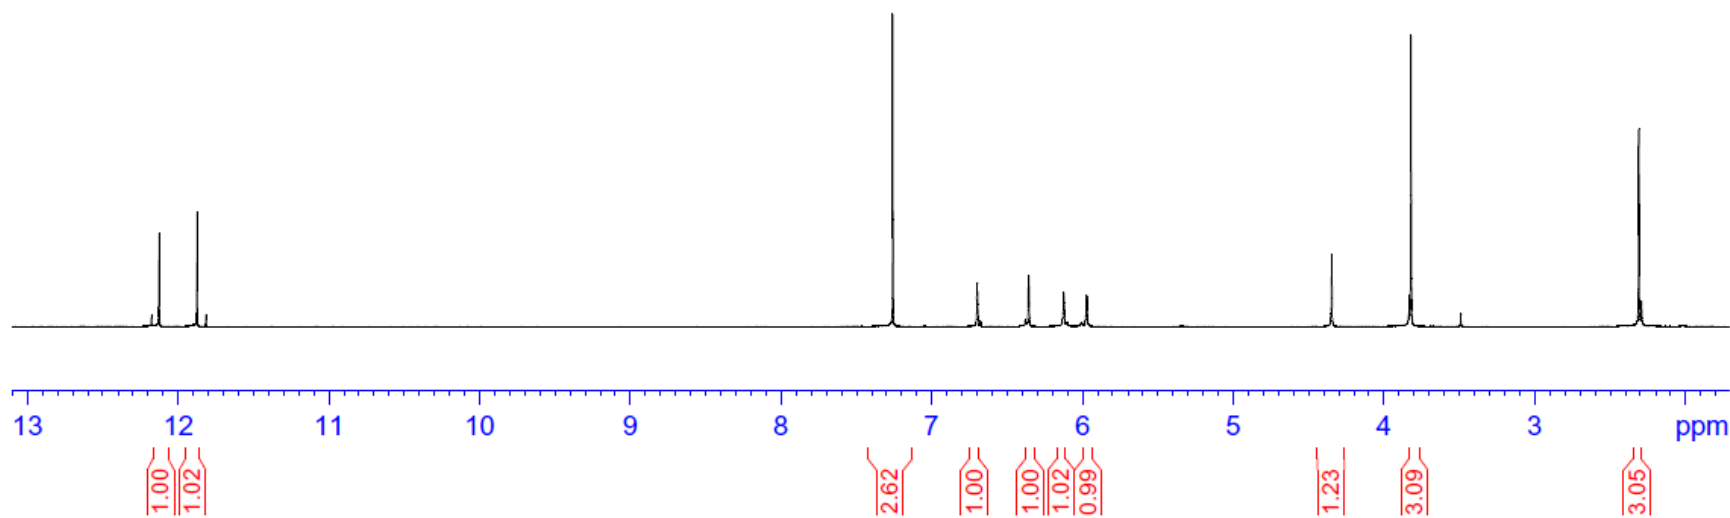

Cartesian coordinates of gauche-1 form of 1,1',8,8'-tetrahydroxybianthrone optimized at the gas-phase  
B3LYP/6-31G(d) level

| atom | X       | Y       | Z       |
|------|---------|---------|---------|
| C    | 2.8502  | 0.6031  | 0.2596  |
| C    | 1.9048  | 1.6533  | 0.2902  |
| C    | 2.2872  | 2.9366  | -0.0903 |
| C    | 3.5989  | 3.1857  | -0.5141 |
| C    | 4.5361  | 2.1650  | -0.5740 |
| C    | 4.1756  | 0.8639  | -0.1932 |
| C    | 2.4888  | -0.7306 | 0.7430  |
| C    | 1.2196  | -0.9159 | 1.4409  |
| C    | 0.2750  | 0.1398  | 1.5095  |
| C    | 0.4646  | 1.3805  | 0.6661  |
| C    | 0.9773  | -2.1223 | 2.1592  |
| C    | -0.1725 | -2.2386 | 2.9552  |
| C    | -1.0594 | -1.1783 | 3.0415  |
| C    | -0.8445 | 0.0079  | 2.3239  |
| C    | -1.9049 | 1.6532  | -0.2901 |
| C    | -2.8502 | 0.6030  | -0.2597 |
| C    | -4.1757 | 0.8638  | 0.1930  |
| C    | -4.5363 | 2.1648  | 0.5738  |
| C    | -3.5991 | 3.1856  | 0.5141  |
| C    | -2.2874 | 2.9365  | 0.0904  |
| C    | -0.4646 | 1.3805  | -0.6659 |
| C    | -0.2750 | 0.1398  | -1.5093 |
| C    | -1.2196 | -0.9160 | -1.4409 |
| C    | -2.4889 | -0.7307 | -0.7431 |
| C    | 0.8447  | 0.0079  | -2.3237 |
| C    | 1.0597  | -1.1782 | -3.0412 |
| C    | 0.1727  | -2.2386 | -2.9551 |
| C    | -0.9772 | -2.1223 | -2.1592 |
| O    | 3.3082  | -1.6881 | 0.6337  |
| O    | -3.3082 | -1.6882 | -0.6339 |
| H    | -0.0989 | 2.2420  | -1.2341 |
| H    | 0.0988  | 2.2420  | 1.2343  |
| O    | 1.8175  | -3.1660 | 2.1267  |
| O    | 5.1132  | -0.0912 | -0.2703 |
| O    | -1.8173 | -3.1660 | -2.1267 |
| O    | -5.1133 | -0.0914 | 0.2700  |
| H    | 2.5705  | -2.9136 | 1.5338  |
| H    | 4.6857  | -0.9374 | 0.0225  |
| H    | -2.5705 | -2.9137 | -1.5340 |
| H    | -4.6857 | -0.9375 | -0.0228 |
| H    | 1.5663  | 3.7494  | -0.0557 |
| H    | 3.8877  | 4.1937  | -0.8002 |
| H    | 5.5540  | 2.3400  | -0.9062 |
| H    | -0.3298 | -3.1646 | 3.4981  |
| H    | -1.9387 | -1.2670 | 3.6740  |
| H    | -1.5552 | 0.8231  | 2.4045  |
| H    | -5.5542 | 2.3398  | 0.9060  |
| H    | -3.8879 | 4.1936  | 0.8002  |
| H    | -1.5665 | 3.7493  | 0.0558  |
| H    | 1.5554  | 0.8232  | -2.4041 |
| H    | 1.9390  | -1.2669 | -3.6736 |
| H    | 0.3301  | -3.1646 | -3.4980 |

Cartesian coordinates of gauche-2 form of 1,1',8,8'-tetrahydroxybianthrone optimized at the gas-phase  
B3LYP/6-31G(d) level

| atom | X       | Y       | Z       |
|------|---------|---------|---------|
| C    | -1.2199 | -0.9160 | 1.4406  |
| C    | -0.2751 | 0.1395  | 1.5092  |
| C    | 0.8444  | 0.0073  | 2.3235  |
| C    | 1.0592  | -1.1790 | 3.0409  |
| C    | 0.1721  | -2.2392 | 2.9546  |
| C    | -0.9778 | -2.1226 | 2.1587  |
| C    | -2.4892 | -0.7306 | 0.7428  |
| C    | -2.8504 | 0.6032  | 0.2595  |
| C    | -1.9048 | 1.6533  | 0.2900  |
| C    | -0.4647 | 1.3803  | 0.6660  |
| C    | -4.1758 | 0.8643  | -0.1933 |
| C    | -4.5361 | 2.1655  | -0.5739 |
| C    | -3.5987 | 3.1861  | -0.5140 |
| C    | -2.2871 | 2.9366  | -0.0903 |
| C    | 0.2751  | 0.1395  | -1.5092 |
| C    | 1.2199  | -0.9161 | -1.4406 |
| C    | 0.9778  | -2.1226 | -2.1587 |
| C    | -0.1721 | -2.2392 | -2.9545 |
| C    | -1.0592 | -1.1791 | -3.0409 |
| C    | -0.8444 | 0.0072  | -2.3235 |
| C    | 0.4647  | 1.3803  | -0.6660 |
| C    | 1.9048  | 1.6533  | -0.2901 |
| C    | 2.8504  | 0.6032  | -0.2595 |
| C    | 2.4892  | -0.7306 | -0.7428 |
| C    | 2.2871  | 2.9366  | 0.0903  |
| C    | 3.5987  | 3.1861  | 0.5140  |
| C    | 4.5361  | 2.1655  | 0.5739  |
| C    | 4.1758  | 0.8643  | 0.1932  |
| O    | -3.3085 | -1.6881 | 0.6335  |
| O    | 3.3085  | -1.6881 | -0.6335 |
| H    | 0.0989  | 2.2417  | -1.2343 |
| H    | -0.0989 | 2.2418  | 1.2343  |
| O    | -5.1138 | -0.0905 | -0.2706 |
| O    | -1.8183 | -3.1659 | 2.1260  |
| O    | 5.1138  | -0.0905 | 0.2706  |
| O    | 1.8183  | -3.1659 | -2.1260 |
| H    | -4.6866 | -0.9370 | 0.0216  |
| H    | -2.5713 | -2.9128 | 1.5332  |
| H    | 4.6867  | -0.9370 | -0.0216 |
| H    | 2.5713  | -2.9128 | -1.5333 |
| H    | 1.5553  | 0.8224  | 2.4042  |
| H    | 1.9385  | -1.2679 | 3.6732  |
| H    | 0.3293  | -3.1653 | 3.4973  |
| H    | -5.5540 | 2.3406  | -0.9062 |
| H    | -3.8873 | 4.1941  | -0.8001 |
| H    | -1.5661 | 3.7493  | -0.0556 |
| H    | -0.3293 | -3.1654 | -3.4972 |
| H    | -1.9386 | -1.2680 | -3.6732 |
| H    | -1.5553 | 0.8224  | -2.4042 |
| H    | 1.5661  | 3.7493  | 0.0556  |
| H    | 3.8873  | 4.1941  | 0.8001  |
| H    | 5.5540  | 2.3406  | 0.9062  |

Cartesian coordinates of anti form of 1,1',8,8'-tetrahydroxybianthrone optimized at the gas-phase B3LYP/6-31G(d) level

| atom | X       | Y       | Z       |
|------|---------|---------|---------|
| C    | -2.5640 | 1.2555  | -0.1157 |
| C    | -1.2967 | 1.2509  | -0.7528 |
| C    | -0.8305 | 2.4064  | -1.3639 |
| C    | -1.6002 | 3.5798  | -1.3301 |
| C    | -2.8196 | 3.6199  | -0.6734 |
| C    | -3.3160 | 2.4614  | -0.0539 |
| C    | -3.1632 | 0.0001  | 0.3353  |
| C    | -2.5641 | -1.2554 | -0.1157 |
| C    | -1.2968 | -1.2510 | -0.7527 |
| C    | -0.4494 | -0.0001 | -0.6811 |
| C    | -3.3162 | -2.4613 | -0.0538 |
| C    | -2.8198 | -3.6199 | -0.6732 |
| C    | -1.6004 | -3.5799 | -1.3300 |
| C    | -0.8307 | -2.4065 | -1.3639 |
| C    | 1.2967  | 1.2509  | 0.7528  |
| C    | 2.5640  | 1.2555  | 0.1157  |
| C    | 3.3161  | 2.4614  | 0.0539  |
| C    | 2.8196  | 3.6199  | 0.6734  |
| C    | 1.6002  | 3.5797  | 1.3302  |
| C    | 0.8305  | 2.4064  | 1.3640  |
| C    | 0.4494  | -0.0001 | 0.6811  |
| C    | 1.2968  | -1.2510 | 0.7527  |
| C    | 2.5641  | -1.2555 | 0.1157  |
| C    | 3.1632  | 0.0000  | -0.3353 |
| C    | 0.8307  | -2.4065 | 1.3639  |
| C    | 1.6004  | -3.5799 | 1.3300  |
| C    | 2.8198  | -3.6199 | 0.6732  |
| C    | 3.3162  | -2.4613 | 0.0538  |
| O    | -4.2430 | 0.0001  | 0.9943  |
| O    | 4.2430  | 0.0001  | -0.9944 |
| H    | -0.2696 | -0.0001 | 1.5064  |
| H    | 0.2696  | -0.0001 | -1.5064 |
| O    | -4.5069 | -2.5392 | 0.5584  |
| O    | -4.5067 | 2.5393  | 0.5583  |
| O    | 4.5069  | -2.5393 | -0.5584 |
| O    | 4.5067  | 2.5394  | -0.5583 |
| H    | -4.7067 | -1.6377 | 0.9187  |
| H    | -4.7064 | 1.6377  | 0.9186  |
| H    | 4.7066  | -1.6377 | -0.9187 |
| H    | 4.7065  | 1.6378  | -0.9186 |
| H    | 0.1382  | 2.4078  | -1.8537 |
| H    | -1.2277 | 4.4756  | -1.8197 |
| H    | -3.4186 | 4.5235  | -0.6296 |
| H    | -3.4189 | -4.5234 | -0.6294 |
| H    | -1.2280 | -4.4757 | -1.8196 |
| H    | 0.1380  | -2.4080 | -1.8536 |
| H    | 3.4186  | 4.5235  | 0.6296  |
| H    | 1.2277  | 4.4756  | 1.8198  |
| H    | -0.1382 | 2.4078  | 1.8538  |
| H    | -0.1380 | -2.4080 | 1.8537  |
| H    | 1.2280  | -4.4757 | 1.8196  |
| H    | 3.4188  | -4.5235 | 0.6294  |

Cartesian coordinates of **1-I** optimized at the gas-phase B3LYP/6-31G(d) level

| atom | X       | Y       | Z       |
|------|---------|---------|---------|
| C    | -1.4192 | -0.9390 | 1.3367  |
| C    | -0.3468 | -0.0108 | 1.3793  |
| C    | 0.8222  | -0.3427 | 2.0481  |
| C    | 0.9915  | -1.6097 | 2.6447  |
| C    | -0.0408 | -2.5360 | 2.5745  |
| C    | -1.2485 | -2.2190 | 1.9352  |
| C    | -2.7159 | -0.5537 | 0.7971  |
| C    | -2.9518 | 0.8462  | 0.4350  |
| C    | -1.8850 | 1.7734  | 0.4354  |
| C    | -0.4605 | 1.3080  | 0.6486  |
| C    | -4.2705 | 1.2930  | 0.1338  |
| C    | -4.5007 | 2.6514  | -0.1302 |
| C    | -3.4431 | 3.5485  | -0.1014 |
| C    | -2.1393 | 3.1170  | 0.1741  |
| C    | 1.8289  | 1.3632  | -0.5163 |
| C    | 2.6148  | 0.1931  | -0.6225 |
| C    | 3.9878  | 0.2473  | -0.2540 |
| C    | 4.5495  | 1.4607  | 0.1657  |
| C    | 3.7798  | 2.6180  | 0.2346  |
| C    | 2.4138  | 2.5526  | -0.0998 |
| C    | 0.3381  | 1.3040  | -0.7678 |
| C    | -0.0861 | 0.1652  | -1.6671 |
| C    | 0.7071  | -1.0079 | -1.7457 |
| C    | 2.0379  | -1.0432 | -1.1446 |
| C    | -1.2736 | 0.2406  | -2.3868 |
| C    | -1.7021 | -0.8510 | -3.1567 |
| C    | -0.9636 | -2.0216 | -3.2146 |
| C    | 0.2483  | -2.1162 | -2.5135 |
| O    | -3.6573 | -1.3965 | 0.7180  |
| O    | 2.7209  | -2.1093 | -1.1542 |
| H    | 0.0364  | 2.2462  | -1.2365 |
| H    | 0.0585  | 2.0744  | 1.2336  |
| C    | 2.2955  | -1.9461 | 3.3249  |
| C    | 4.3989  | 3.9324  | 0.6440  |
| O    | -5.3223 | 0.4625  | 0.0938  |
| O    | -2.2102 | -3.1526 | 1.9286  |
| O    | 0.9388  | -3.2608 | -2.6161 |
| O    | 4.7852  | -0.8319 | -0.2868 |
| H    | -4.9767 | -0.4463 | 0.2941  |
| H    | -2.9851 | -2.7639 | 1.4473  |
| H    | 1.7589  | -3.1530 | -2.0697 |
| H    | 4.2279  | -1.5884 | -0.6065 |
| H    | 1.6315  | 0.3785  | 2.1049  |
| H    | 0.0555  | -3.5225 | 3.0174  |
| H    | -5.5152 | 2.9679  | -0.3485 |
| H    | -3.6300 | 4.6015  | -0.2956 |
| H    | -1.3233 | 3.8350  | 0.1864  |
| H    | 5.6024  | 1.4687  | 0.4310  |
| H    | 1.8071  | 3.4531  | -0.0289 |
| H    | -1.8724 | 1.1443  | -2.3512 |
| H    | -2.6318 | -0.7776 | -3.7146 |
| H    | -1.2873 | -2.8764 | -3.7990 |
| H    | 2.2608  | -2.9305 | 3.8001  |
| H    | 3.1206  | -1.9470 | 2.6013  |
| H    | 2.5437  | -1.2036 | 4.0929  |
| H    | 5.3621  | 3.7853  | 1.1414  |
| H    | 3.7430  | 4.4888  | 1.3229  |
| H    | 4.5721  | 4.5707  | -0.2323 |

Cartesian coordinates of 1-II optimized at the gas-phase B3LYP/6-31G(d) level

| atom | X       | Y       | Z       |
|------|---------|---------|---------|
| C    | -2.6149 | 0.1931  | -0.6224 |
| C    | -1.8290 | 1.3631  | -0.5162 |
| C    | -2.4138 | 2.5526  | -0.0997 |
| C    | -3.7798 | 2.6180  | 0.2347  |
| C    | -4.5496 | 1.4608  | 0.1658  |
| C    | -3.9879 | 0.2473  | -0.2539 |
| C    | -2.0381 | -1.0432 | -1.1446 |
| C    | -0.7073 | -1.0080 | -1.7457 |
| C    | 0.0860  | 0.1651  | -1.6671 |
| C    | -0.3382 | 1.3039  | -0.7678 |
| C    | -0.2485 | -2.1163 | -2.5136 |
| C    | 0.9634  | -2.0217 | -3.2146 |
| C    | 1.7020  | -0.8511 | -3.1568 |
| C    | 1.2735  | 0.2405  | -2.3868 |
| C    | 0.3469  | -0.0109 | 1.3793  |
| C    | 1.4194  | -0.9390 | 1.3367  |
| C    | 1.2487  | -2.2190 | 1.9352  |
| C    | 0.0411  | -2.5361 | 2.5746  |
| C    | -0.9912 | -1.6097 | 2.6448  |
| C    | -0.8221 | -0.3428 | 2.0482  |
| C    | 0.4605  | 1.3079  | 0.6486  |
| C    | 1.8850  | 1.7734  | 0.4353  |
| C    | 2.9518  | 0.8462  | 0.4349  |
| C    | 2.7159  | -0.5537 | 0.7971  |
| C    | 2.1393  | 3.1171  | 0.1741  |
| C    | 3.4430  | 3.5486  | -0.1015 |
| C    | 4.5006  | 2.6515  | -0.1304 |
| C    | 4.2705  | 1.2931  | 0.1336  |
| O    | -2.7211 | -2.1092 | -1.1543 |
| O    | 3.6575  | -1.3964 | 0.7179  |
| H    | -0.0585 | 2.0743  | 1.2336  |
| H    | -0.0365 | 2.2461  | -1.2365 |
| C    | -4.3989 | 3.9324  | 0.6442  |
| C    | -2.2952 | -1.9463 | 3.3251  |
| O    | -0.9390 | -3.2608 | -2.6161 |
| O    | -4.7853 | -0.8318 | -0.2867 |
| O    | 5.3223  | 0.4626  | 0.0935  |
| O    | 2.2105  | -3.1526 | 1.9286  |
| H    | -1.7591 | -3.1530 | -2.0698 |
| H    | -4.2281 | -1.5884 | -0.6065 |
| H    | 4.9767  | -0.4462 | 0.2939  |
| H    | 2.9853  | -2.7638 | 1.4473  |
| H    | -1.8070 | 3.4531  | -0.0288 |
| H    | -5.6024 | 1.4688  | 0.4311  |
| H    | 1.2871  | -2.8765 | -3.7991 |
| H    | 2.6317  | -0.7777 | -3.7146 |
| H    | 1.8723  | 1.1442  | -2.3512 |
| H    | -0.0551 | -3.5226 | 3.0175  |
| H    | -1.6314 | 0.3783  | 2.1050  |
| H    | 1.3232  | 3.8350  | 0.1864  |
| H    | 3.6298  | 4.6015  | -0.2957 |
| H    | 5.5151  | 2.9680  | -0.3488 |
| H    | -4.5721 | 4.5708  | -0.2321 |
| H    | -5.3620 | 3.7854  | 1.1416  |
| H    | -3.7429 | 4.4888  | 1.3231  |
| H    | -3.1204 | -1.9470 | 2.6016  |
| H    | -2.2605 | -2.9307 | 3.8002  |
| H    | -2.5433 | -1.2039 | 4.0933  |

Cartesian coordinates of 1-III optimized at the gas-phase B3LYP/6-31G(d) level

| atom | X       | Y       | Z       |
|------|---------|---------|---------|
| C    | 0.8968  | -0.8205 | -1.6019 |
| C    | -0.0258 | 0.2553  | -1.5282 |
| C    | -1.2713 | 0.1345  | -2.1260 |
| C    | -1.6639 | -1.0602 | -2.7657 |
| C    | -0.7791 | -2.1298 | -2.8086 |
| C    | 0.4994  | -2.0284 | -2.2402 |
| C    | 2.2663  | -0.6581 | -1.1350 |
| C    | 2.7333  | 0.6744  | -0.7433 |
| C    | 1.8195  | 1.7473  | -0.6378 |
| C    | 0.3314  | 1.4965  | -0.7437 |
| C    | 4.1190  | 0.9071  | -0.5132 |
| C    | 4.5672  | 2.2047  | -0.2253 |
| C    | 3.6568  | 3.2494  | -0.1563 |
| C    | 2.2880  | 3.0271  | -0.3534 |
| C    | 0.0258  | 0.2555  | 1.5281  |
| C    | -0.8968 | -0.8203 | 1.6020  |
| C    | -0.4994 | -2.0282 | 2.2404  |
| C    | 0.7791  | -2.1295 | 2.8088  |
| C    | 1.6639  | -1.0598 | 2.7658  |
| C    | 1.2713  | 0.1348  | 2.1259  |
| C    | -0.3314 | 1.4966  | 0.7435  |
| C    | -1.8195 | 1.7474  | 0.6376  |
| C    | -2.7334 | 0.6745  | 0.7432  |
| C    | -2.2663 | -0.6580 | 1.1350  |
| C    | -2.2880 | 3.0271  | 0.3531  |
| C    | -3.6569 | 3.2495  | 0.1559  |
| C    | -4.5673 | 2.2048  | 0.2251  |
| C    | -4.1190 | 0.9072  | 0.5131  |
| O    | 3.0723  | -1.6347 | -1.1461 |
| O    | -3.0723 | -1.6346 | 1.1463  |
| H    | 0.1261  | 2.3636  | 1.2308  |
| H    | -0.1261 | 2.3635  | -1.2311 |
| C    | -3.0436 | -1.1666 | -3.3666 |
| C    | 3.0436  | -1.1662 | 3.3668  |
| O    | 5.0323  | -0.0753 | -0.5572 |
| O    | 1.3085  | -3.0925 | -2.3387 |
| O    | -5.0323 | -0.0752 | 0.5573  |
| O    | -1.3085 | -3.0922 | 2.3391  |
| H    | 4.5419  | -0.9107 | -0.7754 |
| H    | 2.1592  | -2.8498 | -1.8913 |
| H    | -4.5419 | -0.9106 | 0.7755  |
| H    | -2.1592 | -2.8495 | 1.8917  |
| H    | -1.9665 | 0.9678  | -2.0926 |
| H    | -1.0492 | -3.0661 | -3.2870 |
| H    | 5.6292  | 2.3586  | -0.0650 |
| H    | 4.0120  | 4.2544  | 0.0563  |
| H    | 1.5888  | 3.8565  | -0.2837 |
| H    | 1.0492  | -3.0657 | 3.2874  |
| H    | 1.9665  | 0.9681  | 2.0924  |
| H    | -1.5888 | 3.8565  | 0.2832  |
| H    | -4.0120 | 4.2544  | -0.0568 |
| H    | -5.6293 | 2.3586  | 0.0648  |
| H    | -3.8115 | -1.1112 | -2.5844 |
| H    | -3.1778 | -2.1087 | -3.9057 |
| H    | -3.2362 | -0.3423 | -4.0638 |
| H    | 3.2360  | -0.3420 | 4.0641  |
| H    | 3.8115  | -1.1104 | 2.5846  |
| H    | 3.1779  | -2.1084 | 3.9056  |



Cartesian coordinates of 1-IV optimized at the gas-phase B3LYP/6-31G(d) level

| atom | X       | Y       | Z       |
|------|---------|---------|---------|
| C    | 2.8371  | 0.2915  | 0.3809  |
| C    | 1.8922  | 1.3428  | 0.3683  |
| C    | 2.2878  | 2.6225  | -0.0008 |
| C    | 3.6163  | 2.898   | -0.3765 |
| C    | 4.5437  | 1.8612  | -0.3924 |
| C    | 4.1755  | 0.5605  | -0.0212 |
| C    | 2.4619  | -1.0389 | 0.8529  |
| C    | 1.1632  | -1.2257 | 1.4959  |
| C    | 0.2138  | -0.1725 | 1.5192  |
| C    | 0.4371  | 1.0689  | 0.684   |
| C    | 0.893   | -2.4305 | 2.2061  |
| C    | -0.2913 | -2.5492 | 2.9493  |
| C    | -1.1849 | -1.4917 | 2.9923  |
| C    | -0.9412 | -0.3066 | 2.2826  |
| C    | -1.8922 | 1.3428  | -0.3682 |
| C    | -2.8371 | 0.2915  | -0.3808 |
| C    | -4.1755 | 0.5605  | 0.0212  |
| C    | -4.5438 | 1.8611  | 0.3924  |
| C    | -3.6164 | 2.8979  | 0.3766  |
| C    | -2.2878 | 2.6225  | 0.0008  |
| C    | -0.4371 | 1.069   | -0.6839 |
| C    | -0.2137 | -0.1724 | -1.5191 |
| C    | -1.1632 | -1.2256 | -1.4959 |
| C    | -2.4618 | -1.0389 | -0.8529 |
| C    | 0.9412  | -0.3065 | -2.2826 |
| C    | 1.1849  | -1.4915 | -2.9924 |
| C    | 0.2914  | -2.549  | -2.9495 |
| C    | -0.893  | -2.4304 | -2.2062 |
| O    | 3.2889  | -1.9945 | 0.784   |
| O    | -3.2888 | -1.9946 | -0.784  |
| H    | -0.0478 | 1.9298  | -1.2371 |
| H    | 0.0478  | 1.9298  | 1.2372  |
| C    | 4.026   | 4.3054  | -0.7371 |
| C    | -4.0261 | 4.3053  | 0.7371  |
| O    | 1.7383  | -3.471  | 2.2142  |
| O    | 5.1208  | -0.3897 | -0.0599 |
| O    | -1.7382 | -3.4709 | -2.2143 |
| O    | -5.1208 | -0.3898 | 0.0599  |
| H    | 2.5156  | -3.2159 | 1.654   |
| H    | 4.6859  | -1.2365 | 0.2206  |
| H    | -2.5155 | -3.2158 | -1.6541 |
| H    | -4.6859 | -1.2366 | -0.2206 |
| H    | 1.5595  | 3.431   | 0.0015  |
| H    | 5.5746  | 2.0327  | -0.6868 |
| H    | -0.4701 | -3.4745 | 3.4867  |
| H    | -2.0922 | -1.582  | 3.5837  |
| H    | -1.6582 | 0.506   | 2.3278  |
| H    | -5.5746 | 2.0326  | 0.6868  |
| H    | -1.5595 | 3.4311  | -0.0014 |
| H    | 1.6582  | 0.5061  | -2.3278 |
| H    | 2.0922  | -1.5818 | -3.5838 |
| H    | 0.4701  | -3.4743 | -3.4869 |
| H    | 3.2912  | 4.778   | -1.3987 |
| H    | 4.999   | 4.3253  | -1.2364 |
| H    | 4.1006  | 4.9321  | 0.1612  |
| H    | -4.1002 | 4.9322  | -0.1611 |
| H    | -4.9994 | 4.3253  | 1.236   |
| H    | -3.2915 | 4.7777  | 1.3993  |

Cartesian coordinates of anti form of **1a** optimized at the gas-phase B3LYP/6-31G(d) level

| atom | X       | Y       | Z       |
|------|---------|---------|---------|
| C    | 2.8533  | -0.1155 | 0.0526  |
| C    | 1.7276  | -0.6818 | -0.6001 |
| C    | 1.7922  | -1.9768 | -1.0845 |
| C    | 2.9536  | -2.7614 | -0.9177 |
| C    | 4.043   | -2.2287 | -0.2398 |
| C    | 4.0114  | -0.9143 | 0.2523  |
| C    | 2.8819  | 1.3074  | 0.3712  |
| C    | 1.8529  | 2.1697  | -0.2127 |
| C    | 0.7274  | 1.5971  | -0.858  |
| C    | 0.4488  | 0.1221  | -0.6712 |
| C    | 2.0545  | 3.5766  | -0.2659 |
| C    | 1.1658  | 4.3766  | -1.0024 |
| C    | 0.0989  | 3.7894  | -1.6647 |
| C    | -0.1327 | 2.4074  | -1.5871 |
| C    | -1.7279 | 0.682   | 0.5997  |
| C    | -2.8536 | 0.1153  | -0.0526 |
| C    | -4.0119 | 0.9138  | -0.2521 |
| C    | -4.0438 | 2.2283  | 0.2395  |
| C    | -2.9543 | 2.7614  | 0.9171  |
| C    | -1.7927 | 1.9771  | 1.0839  |
| C    | -0.4489 | -0.1216 | 0.6708  |
| C    | -0.7271 | -1.5967 | 0.8578  |
| C    | -1.8525 | -2.1696 | 0.2129  |
| C    | -2.882  | -1.3077 | -0.3708 |
| C    | 0.1335  | -2.4066 | 1.5868  |
| C    | -0.0977 | -3.7887 | 1.6646  |
| C    | -1.1647 | -4.3762 | 1.0027  |
| C    | -2.0537 | -3.5766 | 0.2663  |
| O    | 3.8397  | 1.8035  | 1.0342  |
| O    | -3.8399 | -1.8042 | -1.0335 |
| H    | 0.1634  | 0.2403  | 1.5027  |
| H    | -0.1636 | -0.2396 | -1.5032 |
| C    | 2.988   | -4.169  | -1.4592 |
| C    | -2.989  | 4.1691  | 1.4584  |
| O    | 3.0834  | 4.1823  | 0.3457  |
| O    | 5.103   | -0.4544 | 0.8811  |
| O    | -3.0827 | -4.1826 | -0.3449 |
| O    | -5.1036 | 0.4535  | -0.8806 |
| H    | 3.611   | 3.4724  | 0.7938  |
| H    | 4.9121  | 0.4842  | 1.1386  |
| H    | -3.6106 | -3.4728 | -0.7929 |
| H    | -4.9126 | -0.4851 | -1.138  |
| H    | 0.9274  | -2.4086 | -1.581  |
| H    | 4.9479  | -2.8082 | -0.0842 |
| H    | 1.3506  | 5.4449  | -1.0458 |
| H    | -0.575  | 4.4112  | -2.2482 |
| H    | -0.9947 | 1.9736  | -2.0842 |
| H    | -4.9488 | 2.8076  | 0.084   |
| H    | -0.9278 | 2.4092  | 1.58    |
| H    | 0.9956  | -1.9726 | 2.0835  |
| H    | 0.5765  | -4.4102 | 2.2479  |
| H    | -1.3492 | -5.4446 | 1.0463  |
| H    | 2.8467  | -4.1751 | -2.5471 |
| H    | 3.938   | -4.6639 | -1.2385 |
| H    | 2.179   | -4.7717 | -1.0284 |
| H    | -2.8502 | 4.1751  | 2.5467  |
| H    | -3.9381 | 4.6646  | 1.2355  |
| H    | -2.1786 | 4.7712  | 1.0295  |

Cartesian coordinates of anti form of **1b** optimized at the gas-phase B3LYP/6-31G(d) level

| atom | X       | Y       | Z       |
|------|---------|---------|---------|
| C    | 2.5349  | 0.9411  | 0.0924  |
| C    | 1.2812  | 0.8977  | 0.7544  |
| C    | 0.7976  | 2.029   | 1.3891  |
| C    | 1.5179  | 3.2423  | 1.3668  |
| C    | 2.7234  | 3.3052  | 0.6778  |
| C    | 3.2452  | 2.1705  | 0.0367  |
| C    | 3.1581  | -0.2883 | -0.3857 |
| C    | 2.5937  | -1.5663 | 0.0507  |
| C    | 1.3366  | -1.6029 | 0.7068  |
| C    | 0.4604  | -0.3699 | 0.6737  |
| C    | 3.3716  | -2.753  | -0.046  |
| C    | 2.9107  | -3.9346 | 0.5571  |
| C    | 1.701   | -3.9354 | 1.2331  |
| C    | 0.9059  | -2.7807 | 1.302   |
| C    | -1.2812 | 0.8977  | -0.7544 |
| C    | -2.5349 | 0.9411  | -0.0924 |
| C    | -3.2452 | 2.1705  | -0.0367 |
| C    | -2.7234 | 3.3052  | -0.6778 |
| C    | -1.5179 | 3.2423  | -1.3668 |
| C    | -0.7976 | 2.0289  | -1.3891 |
| C    | -0.4603 | -0.3699 | -0.6737 |
| C    | -1.3366 | -1.6029 | -0.7068 |
| C    | -2.5937 | -1.5663 | -0.0507 |
| C    | -3.1581 | -0.2883 | 0.3858  |
| C    | -0.9059 | -2.7807 | -1.302  |
| C    | -1.701  | -3.9354 | -1.2331 |
| C    | -2.9107 | -3.9346 | -0.5571 |
| C    | -3.3716 | -2.753  | 0.046   |
| O    | 4.2302  | -0.2512 | -1.0582 |
| O    | -4.2302 | -0.2512 | 1.0582  |
| H    | 0.2444  | -0.4004 | -1.5106 |
| H    | -0.2444 | -0.4004 | 1.5106  |
| C    | 0.9658  | 4.4522  | 2.0797  |
| C    | -0.9658 | 4.4522  | -2.0797 |
| O    | 4.5546  | -2.7905 | -0.6769 |
| O    | 4.423   | 2.2932  | -0.5933 |
| O    | -4.5546 | -2.7905 | 0.6769  |
| O    | -4.423  | 2.2932  | 0.5933  |
| H    | 4.7269  | -1.8764 | -1.0203 |
| H    | 4.6442  | 1.4012  | -0.9655 |
| H    | -4.7269 | -1.8764 | 1.0203  |
| H    | -4.6442 | 1.4012  | 0.9656  |
| H    | -0.1645 | 1.9919  | 1.893   |
| H    | 3.2984  | 4.225   | 0.6313  |
| H    | 3.529   | -4.8234 | 0.4863  |
| H    | 1.3566  | -4.8491 | 1.7102  |
| H    | -0.054  | -2.8129 | 1.8076  |
| H    | -3.2984 | 4.225   | -0.6313 |
| H    | 0.1645  | 1.9918  | -1.893  |
| H    | 0.054   | -2.8129 | -1.8076 |
| H    | -1.3566 | -4.8491 | -1.7102 |
| H    | -3.529  | -4.8234 | -0.4863 |
| H    | 0.911   | 4.2774  | 3.1616  |
| H    | 1.5856  | 5.3377  | 1.9128  |
| H    | -0.0528 | 4.6758  | 1.7404  |
| H    | 0.0528  | 4.6757  | -1.7405 |
| H    | -1.5856 | 5.3377  | -1.9128 |
| H    | -0.911  | 4.2774  | -3.1616 |

Cartesian coordinates of **2-I** optimized at the gas-phase B3LYP/6-31G(d) level

| atom | X       | Y       | Z       |
|------|---------|---------|---------|
| C    | -0.9462 | -1.1108 | 1.6021  |
| C    | -0.0097 | -0.049  | 1.5137  |
| C    | 1.2384  | -0.1825 | 2.1044  |
| C    | 1.6222  | -1.3798 | 2.7434  |
| C    | 0.7232  | -2.4369 | 2.7993  |
| C    | -0.5604 | -2.3189 | 2.2457  |
| C    | -2.3218 | -0.9282 | 1.1537  |
| C    | -2.7652 | 0.3979  | 0.7449  |
| C    | -1.8395 | 1.4595  | 0.6097  |
| C    | -0.3526 | 1.1962  | 0.7267  |
| C    | -4.1509 | 0.6574  | 0.5298  |
| C    | -4.582  | 1.9501  | 0.2156  |
| C    | -3.6515 | 2.9802  | 0.1113  |
| C    | -2.2805 | 2.7382  | 0.3019  |
| C    | 1.8164  | 1.4566  | -0.6226 |
| C    | 2.7294  | 0.3826  | -0.7167 |
| C    | 4.1066  | 0.6224  | -0.4576 |
| C    | 4.5435  | 1.9198  | -0.1568 |
| C    | 3.6452  | 2.9814  | -0.1009 |
| C    | 2.278   | 2.7333  | -0.3259 |
| C    | 0.329   | 1.2044  | -0.7483 |
| C    | -0.0128 | -0.0334 | -1.5475 |
| C    | 0.9142  | -1.1074 | -1.6096 |
| C    | 2.272   | -0.947  | -1.1197 |
| C    | -1.2444 | -0.139  | -2.1718 |
| C    | -1.5926 | -1.3289 | -2.8385 |
| C    | -0.7216 | -2.4125 | -2.8788 |
| C    | 0.5337  | -2.3122 | -2.2708 |
| O    | -3.1457 | -1.8921 | 1.1965  |
| O    | 3.0819  | -1.9237 | -1.1212 |
| H    | -0.123  | 2.0716  | -1.2398 |
| H    | 0.1029  | 2.0587  | 1.2239  |
| C    | 3.0076  | -1.5026 | 3.3284  |
| C    | 4.1266  | 4.3848  | 0.1776  |
| O    | -5.0808 | -0.3016 | 0.6233  |
| O    | -1.3858 | -3.3697 | 2.3621  |
| O    | 1.3488  | -3.3713 | -2.3535 |
| O    | 5.0246  | -0.3573 | -0.4835 |
| H    | -4.5972 | -1.1439 | 0.8382  |
| H    | -2.2408 | -3.1102 | 1.931   |
| H    | 2.1879  | -3.1226 | -1.8827 |
| H    | 4.5405  | -1.1923 | -0.7182 |
| O    | -4.0113 | 4.2586  | -0.1796 |
| H    | -5.6442 | 2.121   | 0.0632  |
| O    | -2.8153 | -1.3563 | -3.4288 |
| H    | -0.9826 | -3.339  | -3.3827 |
| H    | -4.9754 | 4.3039  | -0.2819 |
| H    | -2.9528 | -2.2238 | -3.8417 |
| H    | 1.9433  | 0.6421  | 2.0637  |
| H    | 0.9849  | -3.3748 | 3.2793  |
| H    | -1.5884 | 3.5691  | 0.2053  |
| H    | 5.6032  | 2.0697  | 0.0266  |
| H    | 1.5716  | 3.5587  | -0.2643 |
| H    | -1.9604 | 0.6744  | -2.1561 |
| H    | 3.2172  | -0.6825 | 4.0257  |
| H    | 3.7669  | -1.4531 | 2.5375  |
| H    | 3.1377  | -2.4475 | 3.8636  |
| H    | 4.1746  | 4.9715  | -0.7492 |
| H    | 5.1268  | 4.3859  | 0.6209  |
| H    | 3.4488  | 4.9127  | 0.8577  |

Cartesian coordinates of **2-II** optimized at the gas-phase B3LYP/6-31G(d) level

| atom | X       | Y       | Z       |
|------|---------|---------|---------|
| C    | -2.7295 | 0.3825  | -0.7168 |
| C    | -1.8164 | 1.4565  | -0.6226 |
| C    | -2.2781 | 2.7332  | -0.326  |
| C    | -3.6453 | 2.9813  | -0.1011 |
| C    | -4.5436 | 1.9197  | -0.1569 |
| C    | -4.1066 | 0.6223  | -0.4577 |
| C    | -2.2719 | -0.9471 | -1.1197 |
| C    | -0.9141 | -1.1074 | -1.6096 |
| C    | 0.0128  | -0.0333 | -1.5475 |
| C    | -0.329  | 1.2044  | -0.7484 |
| C    | -0.5334 | -2.3121 | -2.2707 |
| C    | 0.7219  | -2.4124 | -2.8788 |
| C    | 1.5928  | -1.3286 | -2.8385 |
| C    | 1.2445  | -0.1388 | -2.1719 |
| C    | 0.0096  | -0.0491 | 1.5137  |
| C    | 0.946   | -1.1108 | 1.602   |
| C    | 0.5604  | -2.319  | 2.2456  |
| C    | -0.7231 | -2.4369 | 2.7994  |
| C    | -1.6222 | -1.3798 | 2.7435  |
| C    | -1.2385 | -0.1826 | 2.1045  |
| C    | 0.3525  | 1.1962  | 0.7267  |
| C    | 1.8394  | 1.4595  | 0.6098  |
| C    | 2.7651  | 0.398   | 0.745   |
| C    | 2.3217  | -0.9283 | 1.1535  |
| C    | 2.2804  | 2.7383  | 0.3022  |
| C    | 3.6514  | 2.9804  | 0.1116  |
| C    | 4.5819  | 1.9502  | 0.2158  |
| C    | 4.1508  | 0.6574  | 0.5299  |
| O    | -3.0818 | -1.9238 | -1.1215 |
| O    | 3.1455  | -1.8922 | 1.1961  |
| H    | -0.1031 | 2.0586  | 1.2239  |
| H    | 0.1229  | 2.0717  | -1.2398 |
| C    | -4.1268 | 4.3847  | 0.1772  |
| C    | -3.0075 | -1.5027 | 3.3288  |
| O    | -1.3484 | -3.3714 | -2.3535 |
| O    | -5.0247 | -0.3574 | -0.4835 |
| O    | 5.0806  | -0.3015 | 0.6232  |
| O    | 1.3859  | -3.3696 | 2.362   |
| H    | -2.1874 | -3.1228 | -1.8825 |
| H    | -4.5407 | -1.1925 | -0.7175 |
| H    | 4.597   | -1.1439 | 0.838   |
| H    | 2.2408  | -3.1099 | 1.9308  |
| O    | 2.8155  | -1.356  | -3.4288 |
| H    | 0.983   | -3.3388 | -3.3827 |
| O    | 4.0112  | 4.2588  | -0.1792 |
| H    | 5.6441  | 2.1211  | 0.0634  |
| H    | 2.953   | -2.2236 | -3.8416 |
| H    | 4.9753  | 4.3039  | -0.2815 |
| H    | -1.5717 | 3.5586  | -0.2644 |
| H    | -5.6033 | 2.0695  | 0.0264  |
| H    | 1.9603  | 0.6747  | -2.1562 |
| H    | -0.9847 | -3.3749 | 3.2795  |
| H    | -1.9434 | 0.6421  | 2.0638  |
| H    | 1.5883  | 3.5692  | 0.2057  |
| H    | -4.1758 | 4.971   | -0.7498 |
| H    | -5.1266 | 4.3857  | 0.6214  |
| H    | -3.4485 | 4.913   | 0.8566  |
| H    | -3.7669 | -1.4538 | 2.5379  |
| H    | -3.1372 | -2.4474 | 3.8645  |
| H    | -3.2172 | -0.6822 | 4.0256  |

Cartesian coordinates of **2-III** optimized at the gas-phase B3LYP/6-31G(d) level

| atom | X       | Y       | Z       |
|------|---------|---------|---------|
| C    | 0.8985  | -1.0967 | -1.614  |
| C    | -0.0279 | -0.026  | -1.5287 |
| C    | -1.2775 | -0.1495 | -2.118  |
| C    | -1.6694 | -1.3427 | -2.7597 |
| C    | -0.7796 | -2.4077 | -2.8144 |
| C    | 0.5029  | -2.3025 | -2.2556 |
| C    | 2.2727  | -0.928  | -1.1576 |
| C    | 2.7303  | 0.3973  | -0.7601 |
| C    | 1.8171  | 1.4714  | -0.6428 |
| C    | 0.328   | 1.2168  | -0.7439 |
| C    | 4.1161  | 0.6401  | -0.531  |
| C    | 4.5624  | 1.9318  | -0.2348 |
| C    | 3.6449  | 2.9768  | -0.1582 |
| C    | 2.272   | 2.7493  | -0.3523 |
| C    | 0.0277  | -0.0253 | 1.5288  |
| C    | -0.8985 | -1.0962 | 1.6143  |
| C    | -0.5025 | -2.3017 | 2.2564  |
| C    | 0.78    | -2.4062 | 2.8154  |
| C    | 1.6695  | -1.341  | 2.7605  |
| C    | 1.2773  | -0.1482 | 2.1183  |
| C    | -0.3283 | 1.2171  | 0.7435  |
| C    | -1.8173 | 1.4715  | 0.6423  |
| C    | -2.7305 | 0.3974  | 0.7598  |
| C    | -2.2727 | -0.9278 | 1.1575  |
| C    | -2.2722 | 2.7494  | 0.3515  |
| C    | -3.6451 | 2.9768  | 0.1574  |
| C    | -4.5626 | 1.9318  | 0.2341  |
| C    | -4.1163 | 0.6402  | 0.5306  |
| O    | 3.0852  | -1.902  | -1.185  |
| O    | -3.0851 | -1.9019 | 1.1848  |
| H    | 0.1311  | 2.083   | 1.2307  |
| H    | -0.1314 | 2.0825  | -1.2315 |
| C    | -3.0534 | -1.4536 | -3.3506 |
| C    | 3.0534  | -1.4513 | 3.3517  |
| O    | 5.0311  | -0.3379 | -0.5857 |
| O    | 1.3176  | -3.3618 | -2.3665 |
| O    | -5.0315 | -0.3376 | 0.5853  |
| O    | -1.3165 | -3.3616 | 2.3678  |
| H    | 4.5379  | -1.1723 | -0.8126 |
| H    | 2.1712  | -3.1139 | -1.9265 |
| H    | -4.5386 | -1.1722 | 0.8121  |
| H    | -2.1701 | -3.1151 | 1.9277  |
| O    | 4.0203  | 4.2549  | 0.112   |
| H    | 5.6254  | 2.091   | -0.075  |
| O    | -4.0206 | 4.2549  | -0.1131 |
| H    | -5.6255 | 2.0909  | 0.0742  |
| H    | 4.9849  | 4.2907  | 0.2131  |
| H    | -4.9852 | 4.2906  | -0.2142 |
| H    | -1.9756 | 0.6811  | -2.0762 |
| H    | -1.0486 | -3.343  | -3.2955 |
| H    | 1.5894  | 3.5894  | -0.2701 |
| H    | 1.0492  | -3.3413 | 3.2968  |
| H    | 1.9752  | 0.6826  | 2.0762  |
| H    | -1.5896 | 3.5895  | 0.2691  |
| H    | -3.2567 | -0.6262 | -4.0411 |
| H    | -3.1859 | -2.393  | -3.8949 |
| H    | -3.8156 | -1.4086 | -2.5621 |
| H    | 3.1863  | -2.3907 | 3.8958  |
| H    | 3.8158  | -1.4057 | 2.5634  |
| H    | 3.256   | -0.6239 | 4.0424  |

Cartesian coordinates of **2-IV** optimized at the gas-phase B3LYP/6-31G(d) level

| atom | X       | Y       | Z       |
|------|---------|---------|---------|
| C    | -2.77   | 0.3839  | -0.6942 |
| C    | -1.8406 | 1.4425  | -0.5822 |
| C    | -2.2837 | 2.7213  | -0.2673 |
| C    | -3.648  | 2.9882  | -0.0449 |
| C    | -4.5635 | 1.9443  | -0.1291 |
| C    | -4.1466 | 0.6445  | -0.4494 |
| C    | -2.3319 | -0.9474 | -1.1111 |
| C    | -0.974  | -1.1245 | -1.5967 |
| C    | -0.0334 | -0.0625 | -1.5322 |
| C    | -0.3564 | 1.1782  | -0.7291 |
| C    | -0.6101 | -2.3306 | -2.2653 |
| C    | 0.6428  | -2.4447 | -2.8757 |
| C    | 1.5266  | -1.3714 | -2.8346 |
| C    | 1.1942  | -0.18   | -2.1629 |
| C    | 1.8406  | 1.4426  | 0.5823  |
| C    | 2.77    | 0.384   | 0.6942  |
| C    | 4.1466  | 0.6446  | 0.4494  |
| C    | 4.5635  | 1.9444  | 0.1292  |
| C    | 3.648   | 2.9882  | 0.045   |
| C    | 2.2837  | 2.7213  | 0.2674  |
| C    | 0.3564  | 1.1782  | 0.7292  |
| C    | 0.0334  | -0.0626 | 1.5323  |
| C    | 0.974   | -1.1246 | 1.5967  |
| C    | 2.3319  | -0.9474 | 1.1109  |
| C    | -1.1942 | -0.1801 | 2.163   |
| C    | -1.5266 | -1.3715 | 2.8346  |
| C    | -0.6427 | -2.4448 | 2.8757  |
| C    | 0.6102  | -2.3306 | 2.2654  |
| O    | -3.1564 | -1.9115 | -1.1279 |
| O    | 3.1564  | -1.9115 | 1.1275  |
| H    | -0.0906 | 2.041   | 1.233   |
| H    | 0.0906  | 2.041   | -1.2329 |
| C    | -4.1067 | 4.394   | 0.2589  |
| C    | 4.1066  | 4.3941  | -0.2589 |
| O    | -1.4396 | -3.3783 | -2.3529 |
| O    | -5.0841 | -0.3121 | -0.5169 |
| O    | 1.4397  | -3.3784 | 2.3529  |
| O    | 5.084   | -0.3121 | 0.5169  |
| H    | -2.2779 | -3.1163 | -1.8871 |
| H    | -4.6122 | -1.1573 | -0.7364 |
| H    | 2.2781  | -3.1163 | 1.8873  |
| H    | 4.612   | -1.1572 | 0.7367  |
| O    | 2.7465  | -1.4105 | -3.4297 |
| H    | 0.8906  | -3.3718 | -3.385  |
| O    | -2.7465 | -1.4106 | 3.4297  |
| H    | -0.8905 | -3.372  | 3.385   |
| H    | 2.8732  | -2.2783 | -3.8455 |
| H    | -2.8733 | -2.2785 | 3.8454  |
| H    | -1.5652 | 3.5351  | -0.192  |
| H    | -5.6222 | 2.1089  | 0.0467  |
| H    | 1.9194  | 0.6249  | -2.1481 |
| H    | 5.6222  | 2.109   | -0.0466 |
| H    | 1.5651  | 3.5352  | 0.1922  |
| H    | -1.9194 | 0.6248  | 2.1482  |
| H    | -4.1152 | 5.0074  | -0.6517 |
| H    | -5.1186 | 4.4051  | 0.6744  |
| H    | -3.4374 | 4.8871  | 0.9729  |
| H    | 3.4386  | 4.8863  | -0.9748 |
| H    | 5.1193  | 4.4053  | -0.6724 |
| H    | 4.1128  | 5.0082  | 0.6512  |

Cartesian coordinates of **3-I** optimized at the gas-phase B3LYP/6-31G(d) level

| atom | X       | Y       | Z       |
|------|---------|---------|---------|
| C    | -2.8781 | 0.5382  | -0.8890 |
| C    | -1.8507 | 1.5082  | -0.8818 |
| C    | -2.1748 | 2.8587  | -0.8288 |
| C    | -3.5142 | 3.2866  | -0.7674 |
| C    | -4.5280 | 2.3337  | -0.7379 |
| C    | -4.2310 | 0.9650  | -0.7945 |
| C    | -2.5586 | -0.8817 | -1.0411 |
| C    | -1.2003 | -1.2661 | -1.3773 |
| C    | -0.1556 | -0.3025 | -1.4019 |
| C    | -0.3989 | 1.0804  | -0.8381 |
| C    | -0.9185 | -2.5955 | -1.8017 |
| C    | 0.3567  | -2.9386 | -2.2698 |
| C    | 1.3491  | -1.9639 | -2.3238 |
| C    | 1.0922  | -0.6459 | -1.8869 |
| C    | -0.3606 | 0.1884  | 1.6121  |
| C    | 0.4373  | -0.9351 | 1.9483  |
| C    | -0.1300 | -1.9719 | 2.7395  |
| C    | -1.4536 | -1.8621 | 3.1910  |
| C    | -2.2174 | -0.7418 | 2.8902  |
| C    | -1.6536 | 0.2855  | 2.1059  |
| C    | 0.1777  | 1.2436  | 0.6709  |
| C    | 1.6898  | 1.3267  | 0.6420  |
| C    | 2.4739  | 0.2104  | 1.0232  |
| C    | 1.8522  | -0.9750 | 1.5962  |
| C    | 2.2998  | 2.4800  | 0.1791  |
| C    | 3.7036  | 2.5505  | 0.0721  |
| C    | 4.4970  | 1.4589  | 0.4185  |
| C    | 3.8893  | 0.2882  | 0.8910  |
| O    | -3.4799 | -1.7514 | -0.9637 |
| O    | 2.5526  | -1.9996 | 1.8617  |
| H    | -0.2056 | 2.2190  | 0.9878  |
| H    | 0.1851  | 1.8011  | -1.4192 |
| C    | -3.8403 | 4.7606  | -0.7532 |
| C    | -3.6456 | -0.6223 | 3.3625  |
| O    | -1.8473 | -3.5609 | -1.7912 |
| O    | -5.2568 | 0.0993  | -0.7514 |
| O    | 4.6936  | -0.7339 | 1.2133  |
| O    | 0.5580  | -3.0680 | 3.0926  |
| H    | -2.6826 | -3.1487 | -1.4448 |
| H    | -4.8609 | -0.8101 | -0.8093 |
| H    | 4.1015  | -1.4739 | 1.5156  |
| H    | 1.4646  | -2.9735 | 2.7004  |
| O    | 2.6064  | -2.1797 | -2.7786 |
| H    | 0.5194  | -3.9605 | -2.5873 |
| O    | 4.1880  | 3.7321  | -0.3843 |
| H    | 5.5768  | 1.4715  | 0.3436  |
| C    | 2.9587  | -3.4877 | -3.2152 |
| C    | 5.5968  | 3.8853  | -0.5152 |
| H    | 2.3418  | -3.8039 | -4.0654 |
| H    | 6.0120  | 3.1637  | -1.2294 |
| H    | -1.3798 | 3.6018  | -0.8335 |
| H    | -5.5722 | 2.6250  | -0.6754 |
| H    | 1.9004  | 0.0746  | -1.9332 |
| H    | -1.8553 | -2.6746 | 3.7886  |
| H    | -2.2534 | 1.1598  | 1.8729  |
| H    | 1.7197  | 3.3516  | -0.1086 |
| H    | -3.7386 | 5.1921  | -1.7577 |
| H    | -4.8659 | 4.9421  | -0.4183 |
| H    | -3.1610 | 5.3140  | -0.0951 |
| H    | -4.3372 | -0.6431 | 2.5106  |
| H    | -3.9171 | -1.4385 | 4.0381  |
| H    | -3.8115 | 0.3263  | 3.8871  |
| H    | 4.0026  | -3.4245 | -3.5257 |
| H    | 2.8620  | -4.2178 | -2.4026 |
| H    | 5.7508  | 4.8983  | -0.8901 |
| H    | 6.1020  | 3.7722  | 0.4519  |



Cartesian coordinates of **3-II** optimized at the gas-phase B3LYP/6-31G(d) level

| atom | X       | Y       | Z       |
|------|---------|---------|---------|
| C    | -0.4372 | -0.9355 | 1.9481  |
| C    | 0.3607  | 0.1881  | 1.6122  |
| C    | 1.6537  | 0.2850  | 2.1060  |
| C    | 2.2175  | -0.7426 | 2.8899  |
| C    | 1.4536  | -1.8630 | 3.1904  |
| C    | 0.1300  | -1.9725 | 2.7390  |
| C    | -1.8522 | -0.9751 | 1.5961  |
| C    | -2.4738 | 0.2104  | 1.0234  |
| C    | -1.6896 | 1.3267  | 0.6423  |
| C    | -0.1775 | 1.2436  | 0.6713  |
| C    | -3.8892 | 0.2881  | 0.8912  |
| C    | -4.4969 | 1.4588  | 0.4188  |
| C    | -3.7035 | 2.5505  | 0.0726  |
| C    | -2.2997 | 2.4800  | 0.1795  |
| C    | 1.8509  | 1.5083  | -0.8815 |
| C    | 2.8782  | 0.5383  | -0.8889 |
| C    | 4.2311  | 0.9649  | -0.7945 |
| C    | 4.5282  | 2.3336  | -0.7378 |
| C    | 3.5145  | 3.2867  | -0.7670 |
| C    | 2.1750  | 2.8588  | -0.8283 |
| C    | 0.3990  | 1.0806  | -0.8378 |
| C    | 0.1556  | -0.3021 | -1.4019 |
| C    | 1.2002  | -1.2658 | -1.3775 |
| C    | 2.5585  | -0.8816 | -1.0411 |
| C    | -1.0923 | -0.6453 | -1.8869 |
| C    | -1.3494 | -1.9631 | -2.3241 |
| C    | -0.3571 | -2.9380 | -2.2703 |
| C    | 0.9181  | -2.5951 | -1.8021 |
| O    | -2.5526 | -1.9997 | 1.8615  |
| O    | 3.4796  | -1.7515 | -0.9637 |
| H    | -0.1849 | 1.8015  | -1.4187 |
| H    | 0.2058  | 2.2189  | 0.9883  |
| C    | 3.6458  | -0.6235 | 3.3620  |
| C    | 3.8406  | 4.7606  | -0.7522 |
| O    | -4.6933 | -0.7341 | 1.2135  |
| O    | -0.5581 | -3.0687 | 3.0918  |
| O    | 1.8468  | -3.5607 | -1.7919 |
| O    | 5.2569  | 0.0993  | -0.7518 |
| H    | -4.1008 | -1.4739 | 1.5160  |
| H    | -1.4648 | -2.9738 | 2.6998  |
| H    | 2.6821  | -3.1490 | -1.4455 |
| H    | 4.8612  | -0.8101 | -0.8099 |
| O    | -4.1879 | 3.7322  | -0.3837 |
| H    | -5.5767 | 1.4715  | 0.3440  |
| O    | -2.6068 | -2.1786 | -2.7789 |
| H    | -0.5199 | -3.9598 | -2.5880 |
| C    | -5.5967 | 3.8853  | -0.5149 |
| C    | -2.9593 | -3.4866 | -3.2153 |
| H    | -6.0116 | 3.1639  | -1.2294 |
| H    | -2.3428 | -3.8030 | -4.0657 |
| H    | 2.2536  | 1.1593  | 1.8734  |
| H    | 1.8553  | -2.6757 | 3.7878  |
| H    | -1.7196 | 3.3517  | -0.1080 |
| H    | 5.5724  | 2.6249  | -0.6754 |
| H    | 1.3801  | 3.6020  | -0.8329 |
| H    | -1.9004 | 0.0754  | -1.9330 |
| H    | 3.8129  | 0.3264  | 3.8839  |
| H    | 4.3373  | -0.6475 | 2.5100  |
| H    | 3.9164  | -1.4382 | 4.0398  |
| H    | 3.7339  | 5.1936  | -1.7555 |
| H    | 4.8677  | 4.9417  | -0.4218 |
| H    | 3.1644  | 5.3129  | -0.0900 |
| H    | -6.1021 | 3.7720  | 0.4519  |
| H    | -5.7506 | 4.8983  | -0.8897 |
| H    | -2.8624 | -4.2167 | -2.4027 |
| H    | -4.0034 | -3.4233 | -3.5253 |

Cartesian coordinates of **3-III** optimized at the gas-phase B3LYP/6-31G(d) level

| atom | X       | Y       | Z       |
|------|---------|---------|---------|
| C    | -0.8660 | -1.3582 | 1.6359  |
| C    | 0.0567  | -0.2862 | 1.5296  |
| C    | 1.3177  | -0.4060 | 2.0954  |
| C    | 1.7238  | -1.5963 | 2.7332  |
| C    | 0.8368  | -2.6624 | 2.8088  |
| C    | -0.4561 | -2.5611 | 2.2739  |
| C    | -2.2491 | -1.1942 | 1.2038  |
| C    | -2.7161 | 0.1281  | 0.8103  |
| C    | -1.8070 | 1.2054  | 0.6737  |
| C    | -0.3155 | 0.9545  | 0.7482  |
| C    | -4.1033 | 0.3699  | 0.6044  |
| C    | -4.5654 | 1.6597  | 0.3114  |
| C    | -3.6527 | 2.7085  | 0.2153  |
| C    | -2.2729 | 2.4774  | 0.3883  |
| C    | -0.0566 | -0.2869 | -1.5298 |
| C    | 0.8662  | -1.3589 | -1.6358 |
| C    | 0.4561  | -2.5622 | -2.2731 |
| C    | -0.8370 | -2.6639 | -2.8074 |
| C    | -1.7240 | -1.5977 | -2.7322 |
| C    | -1.3177 | -0.4070 | -2.0952 |
| C    | 0.3156  | 0.9542  | -0.7491 |
| C    | 1.8071  | 1.2051  | -0.6745 |
| C    | 2.7162  | 0.1278  | -0.8108 |
| C    | 2.2494  | -1.1945 | -1.2042 |
| C    | 2.2729  | 2.4772  | -0.3893 |
| C    | 3.6526  | 2.7084  | -0.2160 |
| C    | 4.5654  | 1.6595  | -0.3117 |
| C    | 4.1034  | 0.3697  | -0.6045 |
| O    | -3.0585 | -2.1705 | 1.2491  |
| O    | 3.0591  | -2.1706 | -1.2499 |
| H    | -0.1509 | 1.8212  | -1.2276 |
| H    | 0.1510  | 1.8218  | 1.2264  |
| C    | 3.1195  | -1.7034 | 3.2969  |
| C    | -3.1198 | -1.7052 | -3.2956 |
| O    | -5.0169 | -0.6091 | 0.6776  |
| O    | -1.2669 | -3.6217 | 2.4036  |
| O    | 5.0169  | -0.6095 | -0.6772 |
| O    | 1.2667  | -3.6229 | -2.4023 |
| H    | -4.5192 | -1.4425 | 0.8979  |
| H    | -2.1287 | -3.3762 | 1.9782  |
| H    | 4.5191  | -1.4427 | -0.8976 |
| H    | 2.1288  | -3.3772 | -1.9777 |
| O    | -3.9928 | 3.9941  | -0.0501 |
| H    | -5.6304 | 1.7955  | 0.1739  |
| O    | 3.9927  | 3.9939  | 0.0492  |
| H    | 5.6304  | 1.7953  | -0.1739 |
| C    | -5.3682 | 4.3119  | -0.2310 |
| C    | 5.3681  | 4.3117  | 0.2306  |
| H    | -5.7927 | 3.7750  | -1.0882 |
| H    | 5.7922  | 3.7749  | 1.0881  |
| H    | 2.0139  | 0.4251  | 2.0360  |
| H    | 1.1165  | -3.5958 | 3.2876  |
| H    | -1.5956 | 3.3203  | 0.2895  |
| H    | -1.1168 | -3.5975 | -3.2855 |
| H    | -2.0140 | 0.4240  | -2.0362 |
| H    | 1.5956  | 3.3201  | -0.2908 |
| H    | 3.3355  | -0.8733 | 3.9802  |
| H    | 3.2637  | -2.6407 | 3.8419  |
| H    | 3.8658  | -1.6605 | 2.4934  |
| H    | -3.2645 | -2.6432 | -3.8392 |
| H    | -3.8660 | -1.6608 | -2.4920 |
| H    | -3.3356 | -0.8760 | -3.9801 |
| H    | -5.9525 | 4.0816  | 0.6682  |
| H    | -5.4012 | 5.3856  | -0.4219 |
| H    | 5.9527  | 4.0812  | -0.6683 |
| H    | 5.4010  | 5.3854  | 0.4212  |

Cartesian coordinates of **3-IV** optimized at the gas-phase B3LYP/6-31G(d) level

| atom | X       | Y       | Z       |
|------|---------|---------|---------|
| C    | -2.6206 | 0.5425  | -1.1401 |
| C    | -1.7183 | 1.5982  | -0.8781 |
| C    | -2.2027 | 2.8794  | -0.6436 |
| C    | -3.5838 | 3.1517  | -0.6507 |
| C    | -4.4768 | 2.1108  | -0.8829 |
| C    | -4.0175 | 0.8087  | -1.1264 |
| C    | -2.1253 | -0.7922 | -1.4764 |
| C    | -0.7078 | -0.9749 | -1.7314 |
| C    | 0.2144  | 0.0849  | -1.5153 |
| C    | -0.2309 | 1.3290  | -0.7779 |
| C    | -0.2396 | -2.1821 | -2.3241 |
| C    | 1.0983  | -2.3102 | -2.7192 |
| C    | 1.9691  | -1.2395 | -2.5368 |
| C    | 1.5258  | -0.0423 | -1.9335 |
| C    | 1.7184  | 1.5984  | 0.8777  |
| C    | 2.6207  | 0.5427  | 1.1400  |
| C    | 4.0175  | 0.8090  | 1.1266  |
| C    | 4.4768  | 2.1111  | 0.8828  |
| C    | 3.5839  | 3.1519  | 0.6502  |
| C    | 2.2028  | 2.8795  | 0.6431  |
| C    | 0.2309  | 1.3292  | 0.7776  |
| C    | -0.2143 | 0.0852  | 1.5152  |
| C    | 0.7079  | -0.9746 | 1.7314  |
| C    | 2.1254  | -0.7919 | 1.4765  |
| C    | -1.5257 | -0.0418 | 1.9335  |
| C    | -1.9690 | -1.2389 | 2.5372  |
| C    | -1.0982 | -2.3095 | 2.7198  |
| C    | 0.2397  | -2.1816 | 2.3244  |
| O    | -2.9407 | -1.7534 | -1.6263 |
| O    | 2.9407  | -1.7531 | 1.6265  |
| H    | -0.2958 | 2.1896  | 1.2024  |
| H    | 0.2959  | 2.1894  | -1.2029 |
| C    | -4.0806 | 4.5597  | -0.4271 |
| C    | 4.0806  | 4.5598  | 0.4258  |
| O    | -1.0465 | -3.2290 | -2.5441 |
| O    | -4.9345 | -0.1458 | -1.3450 |
| O    | 1.0465  | -3.2285 | 2.5447  |
| O    | 4.9345  | -0.1454 | 1.3456  |
| H    | -1.9493 | -2.9631 | -2.2242 |
| H    | -4.4341 | -0.9924 | -1.4824 |
| H    | 1.9492  | -2.9628 | 2.2243  |
| H    | 4.4343  | -0.9920 | 1.4833  |
| O    | 3.2730  | -1.2460 | -2.9022 |
| H    | 1.4044  | -3.2455 | -3.1699 |
| O    | -3.2729 | -1.2451 | 2.9025  |
| H    | -1.4042 | -3.2447 | 3.1708  |
| C    | 3.8094  | -2.4243 | -3.4934 |
| C    | -3.8101 | -2.4231 | 3.4937  |
| H    | 3.2997  | -2.6657 | -4.4343 |
| H    | -3.3030 | -2.6630 | 4.4363  |
| H    | -1.5032 | 3.6907  | -0.4519 |
| H    | -5.5493 | 2.2796  | -0.8853 |
| H    | 2.2439  | 0.7581  | -1.7996 |
| H    | 5.5494  | 2.2800  | 0.8855  |
| H    | 1.5033  | 3.6908  | 0.4511  |
| H    | -2.2437 | 0.7586  | 1.7995  |
| H    | -5.1557 | 4.5789  | -0.2262 |
| H    | -3.8960 | 5.1845  | -1.3108 |
| H    | -3.5662 | 5.0352  | 0.4159  |
| H    | 5.1571  | 4.5797  | 0.2329  |
| H    | 3.5721  | 5.0317  | -0.4229 |
| H    | 3.8882  | 5.1874  | 1.3057  |
| H    | 4.8589  | -2.2033 | -3.6931 |
| H    | 3.7387  | -3.2793 | -2.8104 |
| H    | -4.8603 | -2.2025 | 3.6902  |
| H    | -3.7370 | -3.2789 | 2.8118  |

Cartesian coordinates of 4-I optimized at the gas-phase B3LYP/6-31G(d) level

| atom | X       | Y       | Z       |
|------|---------|---------|---------|
| C    | 1.3647  | -1.1751 | -1.2286 |
| C    | 0.3299  | -0.2260 | -1.3944 |
| C    | -0.8734 | -0.5881 | -1.9984 |
| C    | -1.1240 | -1.9087 | -2.3804 |
| C    | -0.1218 | -2.8618 | -2.1976 |
| C    | 1.1180  | -2.5156 | -1.6441 |
| C    | 2.6862  | -0.7393 | -0.7170 |
| C    | 2.9357  | 0.7051  | -0.5937 |
| C    | 1.8988  | 1.6499  | -0.7283 |
| C    | 0.4693  | 1.1805  | -0.8568 |
| C    | 4.2639  | 1.1724  | -0.3644 |
| C    | 4.5266  | 2.5463  | -0.3192 |
| C    | 3.4847  | 3.4549  | -0.4830 |
| C    | 2.1680  | 3.0124  | -0.6797 |
| C    | -1.7968 | 1.5410  | 0.3195  |
| C    | -2.6910 | 0.4712  | 0.5112  |
| C    | -4.0710 | 0.6849  | 0.2216  |
| C    | -4.5037 | 1.9313  | -0.2413 |
| C    | -3.6053 | 2.9891  | -0.4255 |
| C    | -2.2569 | 2.7774  | -0.1444 |
| C    | -0.3096 | 1.3764  | 0.5558  |
| C    | 0.0204  | 0.2940  | 1.5535  |
| C    | -0.8566 | -0.8089 | 1.6786  |
| C    | -2.1771 | -0.8188 | 1.0437  |
| C    | 1.2013  | 0.3442  | 2.2782  |
| C    | 1.5450  | -0.7284 | 3.1202  |
| C    | 0.7276  | -1.8497 | 3.2247  |
| C    | -0.4681 | -1.9057 | 2.5003  |
| O    | 3.5989  | -1.5507 | -0.4643 |
| O    | -2.8645 | -1.8602 | 1.0197  |
| H    | 0.0711  | 2.3307  | 0.9330  |
| H    | -0.0491 | 1.8627  | -1.5387 |
| C    | -2.4769 | -2.3022 | -2.9188 |
| C    | -4.1046 | 4.3334  | -0.8983 |
| O    | 5.2916  | 0.3332  | -0.1920 |
| O    | 2.1138  | -3.4168 | -1.4903 |
| O    | -1.2264 | -3.0036 | 2.6237  |
| O    | -4.9215 | -0.3490 | 0.4234  |
| H    | 4.8951  | -0.5861 | -0.2223 |
| H    | -2.0069 | -2.8628 | 2.0163  |
| H    | -1.6432 | 0.1628  | -2.1454 |
| H    | -0.3157 | -3.8856 | -2.4939 |
| H    | 5.5494  | 2.8737  | -0.1520 |
| H    | 1.3801  | 3.7506  | -0.7937 |
| H    | -5.5530 | 2.0949  | -0.4581 |
| H    | -1.5487 | 3.5921  | -0.2788 |
| H    | 1.8797  | 1.1858  | 2.2008  |
| H    | 0.9931  | -2.6930 | 3.8566  |
| H    | -2.4440 | -3.2635 | -3.4412 |
| H    | -3.1934 | -2.3917 | -2.0915 |
| H    | -2.8678 | -1.5478 | -3.6106 |
| H    | -4.7385 | 4.2336  | -1.7873 |
| H    | -3.2761 | 5.0035  | -1.1464 |
| H    | -4.7097 | 4.8240  | -0.1251 |
| C    | -6.3105 | -0.1549 | 0.2067  |
| H    | -6.7793 | -1.1077 | 0.4579  |
| H    | -6.7156 | 0.6331  | 0.8547  |
| H    | -6.5268 | 0.0909  | -0.8413 |
| C    | 1.9058  | -4.7596 | -1.9006 |
| H    | 1.6944  | -4.8276 | -2.9757 |
| H    | 2.8415  | -5.2766 | -1.6822 |
| H    | 1.0898  | -5.2320 | -1.3388 |
| O    | 3.6841  | 4.8027  | -0.4557 |
| H    | 4.6286  | 4.9784  | -0.3190 |
| O    | 2.7106  | -0.6116 | 3.8110  |
| H    | 2.8597  | -1.4230 | 4.3218  |

Cartesian coordinates of 4-II optimized at the gas-phase B3LYP/6-31G(d) level

| atom | X       | Y       | Z       |
|------|---------|---------|---------|
| C    | 2.6910  | 0.4711  | 0.5112  |
| C    | 1.7969  | 1.5409  | 0.3194  |
| C    | 2.2570  | 2.7774  | -0.1445 |
| C    | 3.6054  | 2.9890  | -0.4256 |
| C    | 4.5038  | 1.9312  | -0.2415 |
| C    | 4.0710  | 0.6847  | 0.2214  |
| C    | 2.1771  | -0.8188 | 1.0438  |
| C    | 0.8566  | -0.8089 | 1.6787  |
| C    | -0.0203 | 0.2941  | 1.5535  |
| C    | 0.3097  | 1.3764  | 0.5557  |
| C    | 0.4681  | -1.9056 | 2.5005  |
| C    | -0.7275 | -1.8496 | 3.2249  |
| C    | -1.5449 | -0.7282 | 3.1202  |
| C    | -1.2012 | 0.3443  | 2.2783  |
| C    | -0.3299 | -0.2261 | -1.3943 |
| C    | -1.3648 | -1.1751 | -1.2285 |
| C    | -1.1182 | -2.5156 | -1.6441 |
| C    | 0.1216  | -2.8619 | -2.1976 |
| C    | 1.1238  | -1.9089 | -2.3803 |
| C    | 0.8734  | -0.5883 | -1.9983 |
| C    | -0.4692 | 1.1804  | -0.8568 |
| C    | -1.8988 | 1.6499  | -0.7284 |
| C    | -2.9356 | 0.7051  | -0.5937 |
| C    | -2.6862 | -0.7393 | -0.7168 |
| C    | -2.1679 | 3.0124  | -0.6798 |
| C    | -3.4846 | 3.4549  | -0.4831 |
| C    | -4.5265 | 2.5464  | -0.3192 |
| C    | -4.2638 | 1.1725  | -0.3644 |
| O    | 2.8645  | -1.8602 | 1.0199  |
| O    | -3.5989 | -1.5507 | -0.4638 |
| H    | 0.0492  | 1.8626  | -1.5388 |
| H    | -0.0710 | 2.3307  | 0.9329  |
| C    | 4.1047  | 4.3334  | -0.8984 |
| C    | 2.4768  | -2.3025 | -2.9186 |
| O    | 1.2265  | -3.0035 | 2.6239  |
| O    | 4.9214  | -0.3492 | 0.4230  |
| O    | -5.2916 | 0.3333  | -0.1919 |
| O    | -2.1142 | -3.4167 | -1.4904 |
| H    | 2.0070  | -2.8626 | 2.0166  |
| H    | -4.8951 | -0.5859 | -0.2221 |
| H    | 1.5489  | 3.5921  | -0.2788 |
| H    | 5.5531  | 2.0946  | -0.4585 |
| H    | -0.9930 | -2.6928 | 3.8569  |
| H    | -1.8797 | 1.1859  | 2.2008  |
| H    | 0.3154  | -3.8858 | -2.4939 |
| H    | 1.6432  | 0.1626  | -2.1454 |
| H    | -1.3800 | 3.7506  | -0.7939 |
| H    | -5.5493 | 2.8738  | -0.1521 |
| H    | 4.7102  | 4.8238  | -0.1254 |
| H    | 4.7382  | 4.2336  | -1.7877 |
| H    | 3.2762  | 5.0036  | -1.1461 |
| H    | 3.1932  | -2.3919 | -2.0913 |
| H    | 2.8678  | -1.5481 | -3.6105 |
| H    | 2.4438  | -3.2639 | -3.4409 |
| C    | -1.9063 | -4.7594 | -1.9009 |
| H    | -2.8422 | -5.2763 | -1.6827 |
| H    | -1.6948 | -4.8273 | -2.9760 |
| H    | -1.0906 | -5.2321 | -1.3392 |
| C    | 6.3105  | -0.1550 | 0.2066  |
| H    | 6.7154  | 0.6330  | 0.8547  |
| H    | 6.7793  | -1.1077 | 0.4579  |
| H    | 6.5271  | 0.0907  | -0.8413 |
| O    | -2.7105 | -0.6114 | 3.8111  |
| H    | -2.8597 | -1.4229 | 4.3218  |
| O    | -3.6840 | 4.8027  | -0.4559 |
| H    | -4.6285 | 4.9785  | -0.3194 |

Cartesian coordinates of 4-III optimized at the gas-phase B3LYP/6-31G(d) level

| atom | X       | Y       | Z       |
|------|---------|---------|---------|
| C    | -4.5574 | 2.1466  | 0.2017  |
| C    | -3.6613 | 3.2126  | 0.1712  |
| C    | -2.2883 | 3.0062  | 0.3762  |
| C    | -1.8176 | 1.7263  | 0.6416  |
| C    | -2.7051 | 0.6342  | 0.7224  |
| C    | -4.0891 | 0.8540  | 0.4629  |
| C    | -0.3312 | 1.4814  | 0.7420  |
| C    | 0.0275  | 0.2462  | 1.5374  |
| C    | -0.8655 | -0.8474 | 1.6220  |
| C    | -2.2381 | -0.7140 | 1.0801  |
| C    | 1.2792  | 0.1865  | 2.1472  |
| C    | 1.7095  | -0.9679 | 2.8076  |
| C    | 0.8456  | -2.0609 | 2.8817  |
| C    | -0.4331 | -2.0166 | 2.3104  |
| C    | 0.3313  | 1.4814  | -0.7420 |
| C    | 1.8176  | 1.7263  | -0.6417 |
| C    | 2.7052  | 0.6341  | -0.7225 |
| C    | 2.2381  | -0.7140 | -1.0801 |
| C    | 0.8655  | -0.8475 | -1.6220 |
| C    | -0.0275 | 0.2462  | -1.5374 |
| C    | 0.4330  | -2.0166 | -2.3103 |
| C    | -0.8457 | -2.0610 | -2.8815 |
| C    | -1.7096 | -0.9680 | -2.8075 |
| C    | -1.2792 | 0.1865  | -2.1472 |
| C    | 2.2884  | 3.0062  | -0.3763 |
| C    | 3.6614  | 3.2125  | -0.1712 |
| C    | 4.5575  | 2.1465  | -0.2018 |
| C    | 4.0891  | 0.8539  | -0.4630 |
| O    | -3.0160 | -1.6855 | 0.9909  |
| O    | 3.0160  | -1.6856 | -0.9909 |
| C    | 3.0992  | -1.0361 | 3.3920  |
| C    | -3.0993 | -1.0361 | -3.3918 |
| O    | -4.9765 | -0.1502 | 0.4535  |
| O    | -1.2986 | -3.0526 | 2.3978  |
| O    | 4.9765  | -0.1503 | -0.4537 |
| O    | 1.2985  | -3.0527 | -2.3977 |
| H    | -4.4438 | -0.9782 | 0.6409  |
| C    | -0.9156 | -4.2181 | 3.1115  |
| H    | 4.4439  | -0.9783 | -0.6412 |
| C    | 0.9155  | -4.2182 | -3.1115 |
| H    | 0.1273  | 2.3489  | 1.2275  |
| H    | -0.1273 | 2.3489  | -1.2276 |
| H    | 1.1794  | -2.9555 | 3.3935  |
| H    | -1.1795 | -2.9556 | -3.3933 |
| H    | 0.0460  | -4.7063 | -2.6528 |
| H    | -0.0461 | -4.7062 | 2.6529  |
| H    | -5.6200 | 2.2885  | 0.0227  |
| H    | -1.6170 | 3.8577  | 0.3209  |
| H    | 1.9402  | 1.0459  | 2.0915  |
| H    | -1.9402 | 1.0459  | -2.0914 |
| H    | 1.6171  | 3.8577  | -0.3209 |
| H    | 5.6201  | 2.2883  | -0.0228 |
| H    | 3.3262  | -0.1426 | 3.9849  |
| H    | 3.8483  | -1.0909 | 2.5915  |
| H    | 3.2277  | -1.9137 | 4.0329  |
| H    | -3.8484 | -1.0909 | -2.5913 |
| H    | -3.2279 | -1.9137 | -4.0327 |
| H    | -3.3263 | -0.1426 | -3.9848 |
| H    | -0.6939 | -3.9954 | 4.1634  |
| H    | -1.7761 | -4.8869 | 3.0565  |
| H    | 0.6937  | -3.9954 | -4.1633 |
| H    | 1.7759  | -4.8870 | -3.0565 |
| O    | -4.0626 | 4.4919  | -0.0687 |
| H    | -5.0263 | 4.5053  | -0.1812 |
| O    | 4.0627  | 4.4918  | 0.0688  |
| H    | 5.0264  | 4.5051  | 0.1812  |

Cartesian coordinates of 4-IV optimized at the gas-phase B3LYP/6-31G(d) level

| atom | X       | Y       | Z       |
|------|---------|---------|---------|
| C    | 0.6278  | -2.4250 | -2.8979 |
| C    | 1.4896  | -1.3335 | -2.9033 |
| C    | 1.1619  | -0.1479 | -2.2234 |
| C    | -0.0443 | -0.0574 | -1.5438 |
| C    | -0.9638 | -1.1311 | -1.5628 |
| C    | -0.5976 | -2.3374 | -2.2274 |
| C    | -0.3658 | 1.1667  | -0.7232 |
| C    | -1.8511 | 1.4123  | -0.5557 |
| C    | -2.7824 | 0.3607  | -0.6399 |
| C    | -2.3125 | -1.0035 | -1.0010 |
| C    | -2.2716 | 2.7129  | -0.2603 |
| C    | -3.6152 | 3.0066  | -0.0364 |
| C    | -4.5502 | 1.9681  | -0.1117 |
| C    | -4.1588 | 0.6597  | -0.4136 |
| C    | 0.3658  | 1.1667  | 0.7232  |
| C    | 0.0443  | -0.0574 | 1.5438  |
| C    | 0.9638  | -1.1311 | 1.5628  |
| C    | 2.3125  | -1.0035 | 1.0009  |
| C    | 2.7824  | 0.3607  | 0.6399  |
| C    | 1.8511  | 1.4123  | 0.5558  |
| C    | 4.1588  | 0.6597  | 0.4137  |
| C    | 4.5502  | 1.9681  | 0.1118  |
| C    | 3.6152  | 3.0066  | 0.0364  |
| C    | 2.2716  | 2.7129  | 0.2603  |
| C    | -1.1619 | -0.1479 | 2.2234  |
| C    | -1.4895 | -1.3335 | 2.9033  |
| C    | -0.6278 | -2.4251 | 2.8979  |
| C    | 0.5976  | -2.3375 | 2.2274  |
| O    | -3.0559 | -1.9998 | -0.9085 |
| O    | 3.0559  | -1.9999 | 0.9085  |
| C    | -4.0701 | 4.4158  | 0.2597  |
| C    | 4.0701  | 4.4158  | -0.2597 |
| O    | -1.4021 | -3.4072 | -2.2530 |
| O    | -5.0460 | -0.3554 | -0.5171 |
| O    | 1.4021  | -3.4072 | 2.2530  |
| O    | 5.0460  | -0.3554 | 0.5171  |
| H    | -2.2038 | -3.1559 | -1.7110 |
| C    | -6.4260 | -0.0933 | -0.3176 |
| H    | 2.2038  | -3.1559 | 1.7110  |
| C    | 6.4260  | -0.0933 | 0.3176  |
| H    | 0.0578  | 2.0425  | -1.2261 |
| H    | -0.0578 | 2.0425  | 1.2261  |
| H    | -5.5959 | 2.1944  | 0.0616  |
| H    | 5.5959  | 2.1944  | -0.0615 |
| H    | 6.6252  | 0.2739  | -0.6975 |
| H    | -6.6252 | 0.2739  | 0.6975  |
| H    | 0.8767  | -3.3530 | -3.4057 |
| H    | 1.8716  | 0.6711  | -2.2330 |
| H    | -1.5349 | 3.5119  | -0.2097 |
| H    | 1.5349  | 3.5119  | 0.2097  |
| H    | -1.8716 | 0.6711  | 2.2330  |
| H    | -0.8767 | -3.3531 | 3.4056  |
| H    | -3.2214 | 5.0769  | 0.4594  |
| H    | -4.7353 | 4.4452  | 1.1307  |
| H    | -4.6285 | 4.8372  | -0.5861 |
| H    | 4.7348  | 4.4452  | -1.1310 |
| H    | 4.6290  | 4.8370  | 0.5859  |
| H    | 3.2214  | 5.0771  | -0.4588 |
| H    | -6.8119 | 0.6300  | -1.0479 |
| H    | -6.9264 | -1.0525 | -0.4591 |
| H    | 6.8119  | 0.6300  | 1.0480  |
| H    | 6.9264  | -1.0525 | 0.4591  |
| O    | 2.6848  | -1.3540 | -3.5547 |
| H    | 2.8134  | -2.2315 | -3.9485 |
| O    | -2.6848 | -1.3541 | 3.5547  |
| H    | -2.8134 | -2.2316 | 3.9485  |

Cartesian coordinates of **5-I** optimized at the gas-phase B3LYP/6-31G(d) level

| atom | X       | Y       | Z       |
|------|---------|---------|---------|
| C    | -4.4719 | 1.4634  | 0.1043  |
| C    | -3.6870 | 2.5489  | -0.2962 |
| C    | -2.3007 | 2.5140  | -0.1244 |
| C    | -1.6904 | 1.4014  | 0.4453  |
| C    | -2.4533 | 0.2875  | 0.8627  |
| C    | -3.8649 | 0.3399  | 0.6822  |
| C    | -0.1789 | 1.4076  | 0.5572  |
| C    | 0.3539  | 0.4778  | 1.6188  |
| C    | -0.3943 | -0.6674 | 1.9738  |
| C    | -1.7770 | -0.8613 | 1.5101  |
| C    | 1.6006  | 0.6997  | 2.1891  |
| C    | 2.1691  | -0.2316 | 3.0799  |
| C    | 1.4563  | -1.3794 | 3.4046  |
| C    | 0.1834  | -1.6143 | 2.8635  |
| C    | 0.4950  | 1.1486  | -0.8964 |
| C    | 1.8996  | 1.7026  | -0.9214 |
| C    | 2.9923  | 0.8339  | -0.7388 |
| C    | 2.8119  | -0.6310 | -0.6884 |
| C    | 1.5082  | -1.1761 | -1.1188 |
| C    | 0.4114  | -0.3009 | -1.3203 |
| C    | 1.3289  | -2.5526 | -1.4350 |
| C    | 0.1128  | -3.0146 | -1.9575 |
| C    | -0.9337 | -2.1168 | -2.1789 |
| C    | -0.7814 | -0.7623 | -1.8608 |
| C    | 2.1057  | 3.0740  | -1.0363 |
| C    | 3.3984  | 3.6221  | -0.9630 |
| C    | 4.4798  | 2.7730  | -0.7441 |
| C    | 4.2963  | 1.3885  | -0.6191 |
| O    | -2.3682 | -1.9379 | 1.7262  |
| O    | 3.7714  | -1.3606 | -0.3690 |
| C    | 3.5561  | 0.0056  | 3.6252  |
| O    | -4.5906 | -0.7208 | 1.1013  |
| O    | -0.4531 | -2.7404 | 3.2209  |
| O    | 5.3765  | 0.6275  | -0.3829 |
| O    | 2.3742  | -3.3833 | -1.2311 |
| C    | -6.0032 | -0.6936 | 0.9802  |
| H    | 0.1267  | 2.4303  | 0.8012  |
| H    | -0.1182 | 1.7426  | -1.5818 |
| H    | 5.4909  | 3.1607  | -0.6604 |
| H    | -6.3187 | -0.6206 | -0.0690 |
| H    | -5.5439 | 1.4909  | -0.0228 |
| H    | -1.7182 | 3.3749  | -0.4378 |
| H    | 2.1605  | 1.5919  | 1.9259  |
| H    | 1.8672  | -2.1252 | 4.0786  |
| H    | -0.0079 | -4.0609 | -2.1953 |
| H    | -1.6157 | -0.0927 | -2.0343 |
| H    | 1.2538  | 3.7350  | -1.1852 |
| H    | 3.6529  | 1.0141  | 4.0447  |
| H    | 4.3011  | -0.0834 | 2.8240  |
| H    | 3.8124  | -0.7168 | 4.4057  |
| H    | -6.3480 | -1.6422 | 1.3946  |
| H    | -6.4440 | 0.1340  | 1.5515  |
| O    | -4.1852 | 3.6831  | -0.8565 |
| C    | -5.5884 | 3.7944  | -1.0475 |
| H    | -5.9652 | 3.0172  | -1.7248 |
| H    | -6.1294 | 3.7401  | -0.0941 |
| H    | -5.7499 | 4.7748  | -1.4986 |
| C    | 3.6076  | 5.1076  | -1.1366 |
| H    | 2.8215  | 5.6839  | -0.6356 |
| H    | 4.5742  | 5.4263  | -0.7346 |
| H    | 3.5842  | 5.3854  | -2.1987 |
| C    | 2.2452  | -4.7615 | -1.5420 |
| H    | 3.2094  | -5.2061 | -1.2912 |
| H    | 1.4591  | -5.2385 | -0.9427 |
| H    | 2.0386  | -4.9194 | -2.6089 |
| C    | -2.3866 | -3.8328 | -2.9952 |
| H    | -3.4087 | -3.8734 | -3.3754 |
| H    | -1.6997 | -4.2120 | -3.7630 |
| H    | -2.3087 | -4.4550 | -2.0949 |
| O    | -2.1374 | -2.4652 | -2.7024 |
| H    | -1.3152 | -2.7337 | 2.7185  |
| H    | 5.0338  | -0.3081 | -0.3041 |



Cartesian coordinates of **5-II** optimized at the gas-phase B3LYP/6-31G(d) level

| atom | X       | Y       | Z       |
|------|---------|---------|---------|
| C    | -1.9239 | -2.2860 | 1.9536  |
| C    | -2.5432 | -1.5225 | 0.9595  |
| C    | -1.9673 | -0.3221 | 0.5355  |
| C    | -0.7753 | 0.1232  | 1.0973  |
| C    | -0.1232 | -0.6226 | 2.1051  |
| C    | -0.7243 | -1.8427 | 2.5271  |
| C    | -0.1789 | 1.4076  | 0.5572  |
| C    | 0.7601  | 2.0913  | 1.5196  |
| C    | 1.4536  | 1.3168  | 2.4770  |
| C    | 1.1197  | -0.0958 | 2.7166  |
| C    | 1.0012  | 3.4554  | 1.4202  |
| C    | 1.9754  | 4.0821  | 2.2215  |
| C    | 2.6892  | 3.3204  | 3.1388  |
| C    | 2.4459  | 1.9457  | 3.2781  |
| C    | 0.4950  | 1.1486  | -0.8964 |
| C    | 1.5263  | 0.0497  | -0.8000 |
| C    | 1.1891  | -1.2566 | -1.2023 |
| C    | -0.0942 | -1.5494 | -1.8720 |
| C    | -0.8861 | -0.4046 | -2.3663 |
| C    | -0.5373 | 0.9130  | -1.9764 |
| C    | -1.9433 | -0.5633 | -3.3065 |
| C    | -2.5935 | 0.5544  | -3.8481 |
| C    | -2.1976 | 1.8390  | -3.4697 |
| C    | -1.1700 | 2.0150  | -2.5358 |
| C    | 2.7712  | 0.3101  | -0.2353 |
| C    | 3.7109  | -0.7182 | -0.0448 |
| C    | 3.3698  | -2.0191 | -0.4049 |
| C    | 2.1192  | -2.3070 | -0.9700 |
| O    | 1.8307  | -0.7918 | 3.4686  |
| O    | -0.4300 | -2.7335 | -2.0722 |
| C    | 2.2626  | 5.5521  | 2.0372  |
| O    | -0.1055 | -2.5413 | 3.5050  |
| O    | 3.1672  | 1.2688  | 4.1850  |
| O    | 1.8419  | -3.5853 | -1.2710 |
| O    | -2.2779 | -1.8215 | -3.6661 |
| C    | -0.6909 | -3.7401 | 3.9859  |
| H    | -1.0094 | 2.0859  | 0.3359  |
| H    | 1.0153  | 2.0862  | -1.1175 |
| H    | 4.0605  | -2.8436 | -0.2537 |
| H    | -0.7662 | -4.4994 | 3.1963  |
| H    | -2.3704 | -3.2113 | 2.2863  |
| H    | -2.4753 | 0.2531  | -0.2325 |
| H    | 0.4500  | 4.0468  | 0.6955  |
| H    | 3.4558  | 3.7665  | 3.7653  |
| H    | -3.3918 | 0.4188  | -4.5623 |
| H    | -0.8931 | 3.0244  | -2.2547 |
| H    | 3.0236  | 1.3256  | 0.0646  |
| H    | 1.3401  | 6.1446  | 2.0583  |
| H    | 2.7372  | 5.7287  | 1.0634  |
| H    | 2.9330  | 5.9332  | 2.8131  |
| H    | -0.0182 | -4.0982 | 4.7667  |
| H    | -1.6852 | -3.5623 | 4.4163  |
| O    | -3.7104 | -1.8656 | 0.3523  |
| C    | -4.3602 | -3.0663 | 0.7443  |
| H    | -3.7320 | -3.9454 | 0.5511  |
| H    | -4.6393 | -3.0443 | 1.8056  |
| H    | -5.2634 | -3.1278 | 0.1350  |
| C    | 5.0743  | -0.4089 | 0.5263  |
| H    | 5.0120  | 0.3292  | 1.3340  |
| H    | 5.5573  | -1.3080 | 0.9211  |
| H    | 5.7359  | 0.0102  | -0.2434 |
| C    | -3.3182 | -2.0279 | -4.6083 |
| H    | -3.3921 | -3.1101 | -4.7252 |
| H    | -4.2765 | -1.6363 | -4.2436 |
| H    | -3.0826 | -1.5727 | -5.5795 |
| C    | -3.8384 | 2.8804  | -4.8644 |
| H    | -4.1275 | 3.9071  | -5.0950 |
| H    | -3.5446 | 2.3706  | -5.7912 |
| H    | -4.6895 | 2.3560  | -4.4122 |
| O    | -2.7502 | 2.9800  | -3.9567 |
| H    | 2.8676  | 0.3197  | 4.1136  |
| H    | 0.9102  | -3.5799 | -1.6329 |

Cartesian coordinates of 5-III optimized at the gas-phase B3LYP/6-31G(d) level

| atom | X       | Y       | Z       |
|------|---------|---------|---------|
| C    | 4.5040  | 1.9338  | -0.1368 |
| C    | 3.4930  | 2.8996  | -0.1300 |
| C    | 2.1631  | 2.5255  | -0.3400 |
| C    | 1.8343  | 1.1919  | -0.5595 |
| C    | 2.8309  | 0.1906  | -0.5776 |
| C    | 4.1807  | 0.5883  | -0.3601 |
| C    | 0.3689  | 0.8428  | -0.7241 |
| C    | 0.1345  | -0.4389 | -1.4831 |
| C    | 1.1178  | -1.4524 | -1.4439 |
| C    | 2.4511  | -1.2122 | -0.8697 |
| C    | -1.0702 | -0.6600 | -2.1380 |
| C    | -1.3593 | -1.9075 | -2.7243 |
| C    | -0.4100 | -2.9205 | -2.6630 |
| C    | 0.8240  | -2.7151 | -2.0275 |
| C    | -0.3689 | 0.8428  | 0.7241  |
| C    | -1.8343 | 1.1919  | 0.5595  |
| C    | -2.8309 | 0.1906  | 0.5776  |
| C    | -2.4511 | -1.2121 | 0.8696  |
| C    | -1.1178 | -1.4523 | 1.4439  |
| C    | -0.1345 | -0.4389 | 1.4831  |
| C    | -0.8240 | -2.7151 | 2.0275  |
| C    | 0.4099  | -2.9205 | 2.6630  |
| C    | 1.3592  | -1.9075 | 2.7244  |
| C    | 1.0702  | -0.6600 | 2.1381  |
| C    | -2.1631 | 2.5255  | 0.3400  |
| C    | -3.4929 | 2.8996  | 0.1300  |
| C    | -4.5040 | 1.9338  | 0.1368  |
| C    | -4.1807 | 0.5883  | 0.3600  |
| O    | 3.2475  | -2.1578 | -0.7074 |
| O    | -3.2475 | -2.1578 | 0.7073  |
| C    | -2.7104 | -2.1464 | -3.3522 |
| C    | 2.7103  | -2.1464 | 3.3523  |
| O    | 5.1302  | -0.3740 | -0.3910 |
| O    | 1.6949  | -3.7345 | -2.0036 |
| O    | -5.1302 | -0.3740 | 0.3910  |
| O    | -1.6949 | -3.7345 | 2.0036  |
| C    | 6.4942  | -0.0174 | -0.2348 |
| C    | -6.4942 | -0.0173 | 0.2348  |
| H    | -0.1056 | 1.6670  | -1.2660 |
| H    | 0.1056  | 1.6670  | 1.2660  |
| H    | -6.6865 | 0.4301  | -0.7493 |
| H    | -5.5327 | 2.2215  | -0.0223 |
| H    | 6.6865  | 0.4301  | 0.7493  |
| H    | 5.5327  | 2.2214  | 0.0223  |
| H    | 1.4011  | 3.2988  | -0.3353 |
| H    | -1.8143 | 0.1303  | -2.1765 |
| H    | -0.6021 | -3.8985 | -3.0939 |
| H    | 0.6021  | -3.8985 | 3.0940  |
| H    | 1.8142  | 0.1303  | 2.1766  |
| H    | -1.4011 | 3.2988  | 0.3353  |
| H    | -3.0147 | -1.3017 | -3.9814 |
| H    | -3.4725 | -2.2634 | -2.5705 |
| H    | -2.7166 | -3.0522 | -3.9661 |
| H    | 3.4724  | -2.2634 | 2.5706  |
| H    | 2.7165  | -3.0522 | 3.9662  |
| H    | 3.0146  | -1.3017 | 3.9815  |
| H    | 7.0496  | -0.9526 | -0.3192 |
| H    | 6.8253  | 0.6746  | -1.0204 |
| H    | -7.0496 | -0.9526 | 0.3191  |
| H    | -6.8253 | 0.6746  | 1.0203  |
| O    | -3.7094 | 4.2272  | -0.0687 |
| O    | 3.7094  | 4.2272  | 0.0687  |
| C    | 5.0392  | 4.6823  | 0.2740  |
| H    | 5.4823  | 4.2385  | 1.1749  |
| H    | 5.6776  | 4.4630  | -0.5915 |
| H    | 4.9664  | 5.7633  | 0.4037  |
| C    | -5.0392 | 4.6823  | -0.2740 |
| H    | -5.4822 | 4.2386  | -1.1749 |
| H    | -5.6775 | 4.4630  | 0.5915  |
| H    | -4.9663 | 5.7634  | -0.4037 |
| H    | -2.4761 | -3.4128 | 1.4741  |
| H    | 2.4761  | -3.4128 | -1.4742 |

Cartesian coordinates of **5-IV** optimized at the gas-phase B3LYP/6-31G(d) level

| atom | X       | Y       | Z       |
|------|---------|---------|---------|
| C    | 1.2609  | -1.9870 | -2.7422 |
| C    | 2.0890  | -0.8804 | -2.5402 |
| C    | 1.5868  | 0.2759  | -1.9319 |
| C    | 0.2628  | 0.3303  | -1.5178 |
| C    | -0.6157 | -0.7608 | -1.7390 |
| C    | -0.0831 | -1.9317 | -2.3494 |
| C    | -0.2101 | 1.5658  | -0.7832 |
| C    | -1.6914 | 1.8218  | -0.9300 |
| C    | -2.5645 | 0.7440  | -1.1719 |
| C    | -2.0550 | -0.6154 | -1.4404 |
| C    | -2.1962 | 3.1060  | -0.7488 |
| C    | -3.5791 | 3.3553  | -0.7956 |
| C    | -4.4504 | 2.2894  | -1.0017 |
| C    | -3.9664 | 0.9857  | -1.1807 |
| C    | 0.2098  | 1.5657  | 0.7834  |
| C    | -0.2629 | 0.3301  | 1.5179  |
| C    | 0.6158  | -0.7610 | 1.7388  |
| C    | 2.0550  | -0.6154 | 1.4401  |
| C    | 2.5644  | 0.7441  | 1.1718  |
| C    | 1.6912  | 1.8219  | 0.9301  |
| C    | 3.9662  | 0.9859  | 1.1805  |
| C    | 4.4501  | 2.2897  | 1.0017  |
| C    | 3.5788  | 3.3556  | 0.7958  |
| C    | 2.1958  | 3.1061  | 0.7491  |
| C    | -1.5868 | 0.2756  | 1.9322  |
| C    | -2.0888 | -0.8809 | 2.5405  |
| C    | -1.2606 | -1.9874 | 2.7422  |
| C    | 0.0833  | -1.9319 | 2.3492  |
| O    | -2.8494 | -1.5757 | -1.4885 |
| O    | 2.8496  | -1.5756 | 1.4879  |
| C    | -4.1060 | 4.7628  | -0.6458 |
| C    | 4.1055  | 4.7631  | 0.6462  |
| O    | -0.9233 | -2.9722 | -2.5494 |
| O    | -4.8594 | 0.0011  | -1.3598 |
| O    | 0.9236  | -2.9724 | 2.5490  |
| O    | 4.8593  | 0.0013  | 1.3595  |
| C    | -0.4486 | -4.1389 | -3.2016 |
| C    | 0.4491  | -4.1392 | 3.2011  |
| H    | 0.3266  | 2.4293  | -1.1892 |
| H    | -0.3269 | 2.4292  | 1.1895  |
| H    | -0.3523 | -4.6255 | 2.6297  |
| H    | -1.6507 | -2.8816 | 3.2051  |
| H    | 0.3528  | -4.6252 | -2.6301 |
| H    | 1.6512  | -2.8811 | -3.2052 |
| H    | 2.2583  | 1.1126  | -1.7798 |
| H    | -1.5109 | 3.9322  | -0.5689 |
| H    | -5.5258 | 2.4392  | -1.0252 |
| H    | 5.5255  | 2.4395  | 1.0252  |
| H    | 1.5105  | 3.9323  | 0.5693  |
| H    | -2.2584 | 1.1123  | 1.7803  |
| H    | -4.0355 | 5.3106  | -1.5950 |
| H    | -3.5319 | 5.3288  | 0.0963  |
| H    | -5.1572 | 4.7672  | -0.3415 |
| H    | 3.5314  | 5.3291  | -0.0959 |
| H    | 5.1567  | 4.7676  | 0.3418  |
| H    | 4.0350  | 5.3107  | 1.5955  |
| H    | -1.3081 | -4.8087 | -3.2587 |
| H    | -0.0909 | -3.9201 | -4.2164 |
| H    | 1.3086  | -4.8090 | 3.2580  |
| H    | 0.0915  | -3.9205 | 4.2159  |
| O    | -3.3955 | -0.8320 | 2.9023  |
| O    | 3.3958  | -0.8314 | -2.9018 |
| C    | 3.9964  | -1.9876 | -3.4684 |
| H    | 3.9512  | -2.8400 | -2.7791 |
| H    | 3.5235  | -2.2611 | -4.4206 |
| H    | 5.0395  | -1.7221 | -3.6467 |
| C    | -3.9960 | -1.9883 | 3.4688  |
| H    | -3.9508 | -2.8405 | 2.7794  |
| H    | -3.5229 | -2.2619 | 4.4209  |
| H    | -5.0391 | -1.7229 | 3.6474  |
| H    | 4.3229  | -0.8390 | 1.4220  |
| H    | -4.3230 | -0.8392 | -1.4222 |

Cartesian coordinates of 1,1'-acetylated **5-I** optimized at the gas-phase B3LYP/6-31G(d) level

| atom | X       | Y       | Z       |
|------|---------|---------|---------|
| C    | 4.5841  | 2.0550  | 0.2043  |
| C    | 3.7157  | 3.1456  | 0.0893  |
| C    | 2.3766  | 2.9452  | -0.2550 |
| C    | 1.8991  | 1.6581  | -0.4844 |
| C    | 2.7444  | 0.5368  | -0.3678 |
| C    | 4.1052  | 0.7571  | -0.0212 |
| C    | 0.4315  | 1.4859  | -0.8148 |
| C    | 0.1434  | 0.2359  | -1.6114 |
| C    | 0.9769  | -0.8929 | -1.4779 |
| C    | 2.2077  | -0.8281 | -0.6261 |
| C    | -0.9864 | 0.1865  | -2.4301 |
| C    | -1.3600 | -0.9863 | -3.0930 |
| C    | -0.5369 | -2.1067 | -2.9612 |
| C    | 0.6097  | -2.0581 | -2.1780 |
| C    | -0.4718 | 1.6053  | 0.5214  |
| C    | -1.8946 | 1.9788  | 0.1694  |
| C    | -2.8934 | 0.9929  | 0.1153  |
| C    | -2.5587 | -0.4350 | 0.4425  |
| C    | -1.3666 | -0.6329 | 1.3044  |
| C    | -0.3878 | 0.3825  | 1.4063  |
| C    | -1.1990 | -1.8041 | 2.0912  |
| C    | -0.1037 | -1.9323 | 2.9562  |
| C    | 0.8333  | -0.9001 | 3.0484  |
| C    | 0.6884  | 0.2574  | 2.2757  |
| C    | -2.1901 | 3.3070  | -0.1580 |
| C    | -3.4728 | 3.6985  | -0.5429 |
| C    | -4.4695 | 2.7162  | -0.6006 |
| C    | -4.1862 | 1.3958  | -0.2812 |
| O    | 2.7494  | -1.8425 | -0.1997 |
| O    | -3.2630 | -1.3568 | 0.0415  |
| C    | -2.6464 | -1.0480 | -3.8773 |
| O    | 4.9114  | -0.3261 | 0.0562  |
| O    | 1.3260  | -3.2433 | -2.0724 |
| O    | -5.2259 | 0.4916  | -0.4473 |
| O    | -2.1475 | -2.7629 | 1.9909  |
| C    | 6.2943  | -0.1477 | 0.3115  |
| H    | 0.1273  | 2.3516  | -1.4133 |
| H    | -0.0302 | 2.4491  | 1.0618  |
| H    | -5.4849 | 2.9679  | -0.8928 |
| H    | 6.4702  | 0.3000  | 1.2988  |
| H    | 5.6217  | 2.2107  | 0.4603  |
| H    | 1.7289  | 3.8117  | -0.3478 |
| H    | -1.6067 | 1.0723  | -2.5321 |
| H    | -0.7771 | -3.0382 | -3.4648 |
| H    | 0.0102  | -2.8252 | 3.5526  |
| H    | 1.4371  | 1.0364  | 2.3612  |
| H    | -1.3998 | 4.0535  | -0.1056 |
| H    | -2.8187 | -0.1245 | -4.4411 |
| H    | -3.4931 | -1.1763 | -3.1902 |
| H    | -2.6530 | -1.8868 | -4.5804 |
| H    | 6.7260  | -1.1496 | 0.2900  |
| H    | 6.7731  | 0.4706  | -0.4593 |
| C    | 2.5990  | -3.3002 | -2.5841 |
| C    | 3.2770  | -4.5605 | -2.1181 |
| H    | 3.5509  | -4.4198 | -1.0670 |
| H    | 2.6012  | -5.4180 | -2.1802 |
| H    | 4.1751  | -4.7359 | -2.7119 |
| O    | 3.0726  | -2.4514 | -3.2962 |
| O    | 4.0883  | 4.4396  | 0.2874  |
| C    | 5.4376  | 4.7184  | 0.6308  |
| H    | 5.7187  | 4.2420  | 1.5790  |
| H    | 6.1293  | 4.3944  | -0.1576 |
| H    | 5.4986  | 5.8025  | 0.7403  |
| C    | -3.7942 | 5.1379  | -0.8659 |
| H    | -2.8866 | 5.7460  | -0.9303 |
| H    | -4.3284 | 5.2233  | -1.8194 |
| H    | -4.4381 | 5.5814  | -0.0958 |
| C    | -2.0512 | -3.9244 | 2.7982  |
| H    | -2.9270 | -4.5255 | 2.5485  |
| H    | -1.1426 | -4.4984 | 2.5736  |
| H    | -2.0725 | -3.6788 | 3.8683  |
| C    | 2.1732  | -2.1015 | 4.6235  |
| H    | 3.0973  | -1.9069 | 5.1706  |
| H    | 1.3662  | -2.3057 | 5.3395  |
| H    | 2.3130  | -2.9729 | 3.9717  |
| O    | 1.9166  | -0.9270 | 3.8680  |
| C    | -5.7134 | -0.1698 | 0.6571  |
| O    | -5.4450 | 0.1409  | 1.7893  |
| C    | -6.6044 | -1.3004 | 0.2209  |
| H    | -7.1910 | -1.6543 | 1.0697  |
| H    | -7.2600 | -0.9934 | -0.5987 |
| H    | -5.9592 | -2.1070 | -0.1435 |

Cartesian coordinates of 1,1'-acetylated **5-II** optimized at the gas-phase B3LYP/6-31G(d) level

| atom | X       | Y       | Z       |
|------|---------|---------|---------|
| C    | 0.1037  | -1.9323 | 2.9561  |
| C    | -0.8334 | -0.9001 | 3.0483  |
| C    | -0.6884 | 0.2574  | 2.2757  |
| C    | 0.3877  | 0.3825  | 1.4063  |
| C    | 1.3665  | -0.6329 | 1.3044  |
| C    | 1.1990  | -1.8040 | 2.0912  |
| C    | 0.4718  | 1.6053  | 0.5215  |
| C    | 1.8946  | 1.9788  | 0.1695  |
| C    | 2.8934  | 0.9929  | 0.1154  |
| C    | 2.5587  | -0.4350 | 0.4425  |
| C    | 2.1901  | 3.3070  | -0.1579 |
| C    | 3.4729  | 3.6985  | -0.5429 |
| C    | 4.4695  | 2.7162  | -0.6005 |
| C    | 4.1862  | 1.3958  | -0.2811 |
| C    | -0.4314 | 1.4861  | -0.8148 |
| C    | -0.1434 | 0.2360  | -1.6114 |
| C    | -0.9768 | -0.8927 | -1.4779 |
| C    | -2.2075 | -0.8281 | -0.6261 |
| C    | -2.7443 | 0.5367  | -0.3677 |
| C    | -1.8991 | 1.6582  | -0.4844 |
| C    | -4.1051 | 0.7569  | -0.0211 |
| C    | -4.5841 | 2.0548  | 0.2043  |
| C    | -3.7158 | 3.1455  | 0.0893  |
| C    | -2.3767 | 2.9452  | -0.2550 |
| C    | 0.9863  | 0.1868  | -2.4302 |
| C    | 1.3600  | -0.9859 | -3.0933 |
| C    | 0.5369  | -2.1064 | -2.9615 |
| C    | -0.6096 | -2.0579 | -2.1782 |
| O    | 3.2628  | -1.3568 | 0.0414  |
| O    | -2.7492 | -1.8425 | -0.1998 |
| C    | 3.7943  | 5.1379  | -0.8657 |
| O    | 2.1475  | -2.7628 | 1.9909  |
| O    | 5.2259  | 0.4916  | -0.4471 |
| O    | -1.3257 | -3.2431 | -2.0725 |
| O    | -4.9113 | -0.3263 | 0.0565  |
| C    | 2.0513  | -3.9244 | 2.7982  |
| H    | 0.0302  | 2.4491  | 1.0619  |
| H    | -0.1273 | 2.3518  | -1.4132 |
| H    | 0.7771  | -3.0378 | -3.4652 |
| H    | 1.1428  | -4.4984 | 2.5737  |
| H    | -0.0103 | -2.8252 | 3.5526  |
| H    | -1.4371 | 1.0364  | 2.3611  |
| H    | 1.3998  | 4.0535  | -0.1055 |
| H    | 5.4850  | 2.9678  | -0.8928 |
| H    | -5.6218 | 2.2104  | 0.4604  |
| H    | -1.7290 | 3.8118  | -0.3479 |
| H    | 1.6067  | 1.0726  | -2.5322 |
| H    | 2.8868  | 5.7459  | -0.9306 |
| H    | 4.3291  | 5.2234  | -1.8189 |
| H    | 4.4378  | 5.5814  | -0.0952 |
| H    | 2.9271  | -4.5254 | 2.5486  |
| H    | 2.0726  | -3.6787 | 3.8683  |
| C    | 5.7132  | -0.1701 | 0.6573  |
| C    | 6.6041  | -1.3007 | 0.2211  |
| H    | 5.9588  | -2.1072 | -0.1436 |
| H    | 7.2599  | -0.9937 | -0.5984 |
| H    | 7.1904  | -1.6549 | 1.0699  |
| O    | 5.4447  | 0.1406  | 1.7894  |
| O    | -1.9167 | -0.9270 | 3.8680  |
| C    | -2.1734 | -2.1016 | 4.6232  |
| H    | -2.3131 | -2.9730 | 3.9713  |
| H    | -1.3666 | -2.3060 | 5.3393  |
| H    | -3.0976 | -1.9071 | 5.1701  |
| C    | 2.6463  | -1.0475 | -3.8776 |
| H    | 2.8186  | -0.1239 | -4.4413 |
| H    | 3.4931  | -1.1759 | -3.1906 |
| H    | 2.6529  | -1.8862 | -4.5808 |
| C    | -6.2943 | -0.1480 | 0.3107  |
| H    | -6.7260 | -1.1498 | 0.2888  |
| H    | -6.4710 | 0.2996  | 1.2980  |
| H    | -6.7725 | 0.4705  | -0.4603 |
| C    | -5.4377 | 4.7181  | 0.6315  |
| H    | -5.4986 | 5.8022  | 0.7414  |
| H    | -6.1298 | 4.3943  | -0.1566 |
| H    | -5.7182 | 4.2414  | 1.5797  |
| O    | -4.0885 | 4.4395  | 0.2873  |
| C    | -2.5988 | -3.3002 | -2.5841 |
| O    | -3.0726 | -2.4513 | -3.2960 |
| C    | -3.2767 | -4.5605 | -2.1181 |
| H    | -4.1745 | -4.7363 | -2.7123 |
| H    | -2.6006 | -5.4178 | -2.1795 |
| H    | -3.5512 | -4.4195 | -1.0671 |

Cartesian coordinates of 1,1'-acetylated **5**-III optimized at the gas-phase B3LYP/6-31G(d) level

| atom | X       | Y       | Z       |
|------|---------|---------|---------|
| C    | -4.4877 | 2.4165  | -0.5475 |
| C    | -3.4943 | 3.3882  | -0.3847 |
| C    | -2.2064 | 3.0185  | 0.0112  |
| C    | -1.9049 | 1.6804  | 0.2481  |
| C    | -2.8796 | 0.6758  | 0.0838  |
| C    | -4.1857 | 1.0673  | -0.3181 |
| C    | -0.4875 | 1.3233  | 0.6458  |
| C    | -0.4010 | 0.0447  | 1.4461  |
| C    | -1.3652 | -0.9685 | 1.2647  |
| C    | -2.5305 | -0.7465 | 0.3510  |
| C    | 0.6772  | -0.1533 | 2.3096  |
| C    | 0.8685  | -1.3677 | 2.9760  |
| C    | -0.0855 | -2.3722 | 2.7995  |
| C    | -1.1812 | -2.1743 | 1.9679  |
| C    | 0.4875  | 1.3234  | -0.6459 |
| C    | 1.9049  | 1.6804  | -0.2481 |
| C    | 2.8795  | 0.6758  | -0.0838 |
| C    | 2.5304  | -0.7464 | -0.3511 |
| C    | 1.3652  | -0.9685 | -1.2648 |
| C    | 0.4010  | 0.0447  | -1.4462 |
| C    | 1.1812  | -2.1743 | -1.9680 |
| C    | 0.0856  | -2.3721 | -2.7996 |
| C    | -0.8685 | -1.3676 | -2.9761 |
| C    | -0.6771 | -0.1532 | -2.3097 |
| C    | 2.2063  | 3.0185  | -0.0111 |
| C    | 3.4943  | 3.3882  | 0.3848  |
| C    | 4.4877  | 2.4165  | 0.5476  |
| C    | 4.1856  | 1.0673  | 0.3181  |
| O    | -3.1681 | -1.6819 | -0.1233 |
| O    | 3.1680  | -1.6819 | 0.1233  |
| C    | 2.1029  | -1.5972 | 3.8107  |
| C    | -2.1029 | -1.5971 | -3.8109 |
| O    | -5.1169 | 0.0939  | -0.4442 |
| O    | -2.0357 | -3.2581 | 1.8193  |
| O    | 5.1168  | 0.0939  | 0.4442  |
| O    | 2.0357  | -3.2580 | -1.8194 |
| C    | -6.4600 | 0.4484  | -0.7291 |
| C    | 6.4600  | 0.4484  | 0.7292  |
| H    | -0.1087 | 2.1429  | 1.2654  |
| H    | 0.1087  | 2.1429  | -1.2654 |
| H    | 6.5539  | 0.9266  | 1.7134  |
| H    | 5.4863  | 2.7029  | 0.8432  |
| H    | -6.5539 | 0.9266  | -1.7134 |
| H    | -5.4863 | 2.7029  | -0.8431 |
| H    | -1.4598 | 3.7960  | 0.1413  |
| H    | 1.4022  | 0.6444  | 2.4437  |
| H    | 0.0114  | -3.3290 | 3.3035  |
| H    | -0.0114 | -3.3289 | -3.3037 |
| H    | -1.4021 | 0.6445  | -2.4438 |
| H    | 1.4598  | 3.7960  | -0.1413 |
| H    | 2.3459  | -0.7189 | 4.4195  |
| H    | 2.9610  | -1.7905 | 3.1536  |
| H    | 1.9872  | -2.4567 | 4.4783  |
| H    | -2.9610 | -1.7903 | -3.1538 |
| H    | -1.9871 | -2.4566 | -4.4785 |
| H    | -2.3458 | -0.7188 | -4.4197 |
| H    | -7.0145 | -0.4913 | -0.7327 |
| H    | -6.8755 | 1.1131  | 0.0396  |
| H    | 7.0145  | -0.4913 | 0.7328  |
| H    | 6.8754  | 1.1131  | -0.0395 |
| C    | 3.3330  | -3.1520 | -2.2579 |
| C    | -3.3330 | -3.1521 | 2.2579  |
| C    | 4.1364  | -4.3191 | -1.7509 |
| H    | 4.3316  | -4.1495 | -0.6865 |
| H    | 3.5774  | -5.2541 | -1.8469 |
| H    | 5.0809  | -4.3786 | -2.2933 |
| C    | -4.1363 | -4.3194 | 1.7512  |
| H    | -4.3324 | -4.1494 | 0.6869  |
| H    | -3.5770 | -5.2542 | 1.8463  |
| H    | -5.0804 | -4.3793 | 2.2942  |
| O    | 3.7353  | -2.2464 | -2.9435 |
| O    | -3.7353 | -2.2465 | 2.9435  |
| O    | 3.6931  | 4.7196  | 0.5826  |
| O    | -3.6931 | 4.7196  | -0.5825 |
| C    | -4.9851 | 5.1705  | -0.9620 |
| H    | -5.2921 | 4.7478  | -1.9274 |
| H    | -5.7371 | 4.9239  | -0.2015 |
| H    | -4.9064 | 6.2552  | -1.0529 |
| C    | 4.9850  | 5.1705  | 0.9622  |
| H    | 5.2921  | 4.7477  | 1.9276  |
| H    | 5.7370  | 4.9239  | 0.2017  |
| H    | 4.9064  | 6.2552  | 1.0531  |

Cartesian coordinates of 1,1'-acetylated **5-IV** optimized at the gas-phase B3LYP/6-31G(d) level

| atom | X       | Y       | Z       |
|------|---------|---------|---------|
| C    | -0.4364 | -1.7789 | 3.0632  |
| C    | -1.2576 | -0.6505 | 3.1265  |
| C    | -0.9524 | 0.4885  | 2.3737  |
| C    | 0.1668  | 0.4991  | 1.5507  |
| C    | 1.0307  | -0.6175 | 1.4789  |
| C    | 0.7023  | -1.7671 | 2.2462  |
| C    | 0.4250  | 1.7120  | 0.6864  |
| C    | 1.8947  | 1.9314  | 0.4066  |
| C    | 2.7822  | 0.8433  | 0.3895  |
| C    | 2.2778  | -0.5430 | 0.6769  |
| C    | 2.3490  | 3.2227  | 0.1163  |
| C    | 3.6857  | 3.4765  | -0.1936 |
| C    | 4.5727  | 2.3930  | -0.2088 |
| C    | 4.1313  | 1.1083  | 0.0747  |
| C    | -0.4250 | 1.7120  | -0.6866 |
| C    | -0.1668 | 0.4990  | -1.5507 |
| C    | -1.0308 | -0.6175 | -1.4789 |
| C    | -2.2778 | -0.5430 | -0.6769 |
| C    | -2.7822 | 0.8433  | -0.3895 |
| C    | -1.8947 | 1.9315  | -0.4067 |
| C    | -4.1313 | 1.1083  | -0.0747 |
| C    | -4.5726 | 2.3930  | 0.2088  |
| C    | -3.6856 | 3.4766  | 0.1935  |
| C    | -2.3489 | 3.2228  | -0.1165 |
| C    | 0.9524  | 0.4884  | -2.3738 |
| C    | 1.2576  | -0.6506 | -3.1266 |
| C    | 0.4363  | -1.7791 | -3.0632 |
| C    | -0.7023 | -1.7672 | -2.2461 |
| O    | 2.8961  | -1.5330 | 0.2994  |
| O    | -2.8961 | -1.5330 | -0.2993 |
| C    | 4.1769  | 4.8749  | -0.4806 |
| C    | -4.1768 | 4.8750  | 0.4804  |
| O    | 1.5427  | -2.8253 | 2.1766  |
| O    | 5.0778  | 0.0997  | -0.0367 |
| O    | -1.5428 | -2.8254 | -2.1765 |
| O    | -5.0777 | 0.0998  | 0.0369  |
| C    | 1.2987  | -3.9608 | 2.9895  |
| C    | -1.2988 | -3.9609 | -2.9893 |
| H    | 0.0528  | 2.5932  | 1.2204  |
| H    | -0.0527 | 2.5931  | -1.2206 |
| H    | -0.3457 | -4.4435 | -2.7355 |
| H    | 0.6743  | -2.6578 | -3.6440 |
| H    | 0.3457  | -4.4434 | 2.7357  |
| H    | -0.6744 | -2.6577 | 3.6441  |
| H    | -1.6139 | 1.3448  | 2.4382  |
| H    | 1.6422  | 4.0503  | 0.1393  |
| H    | 5.6246  | 2.5358  | -0.4388 |
| H    | -5.6246 | 2.5359  | 0.4388  |
| H    | -1.6421 | 4.0503  | -0.1396 |
| H    | 1.6139  | 1.3447  | -2.4384 |
| H    | 3.3461  | 5.5833  | -0.5554 |
| H    | 4.7412  | 4.9145  | -1.4198 |
| H    | 4.8473  | 5.2296  | 0.3125  |
| H    | -4.7408 | 4.9147  | 1.4198  |
| H    | -4.8475 | 5.2296  | -0.3125 |
| H    | -3.3460 | 5.5834  | 0.5548  |
| H    | 2.1178  | -4.6506 | 2.7794  |
| H    | 1.3047  | -3.7049 | 4.0572  |
| H    | -2.1179 | -4.6507 | -2.7792 |
| H    | -1.3047 | -3.7051 | -4.0571 |
| C    | -5.4212 | -0.6163 | -1.0857 |
| C    | 5.4212  | -0.6163 | 1.0859  |
| C    | -6.2169 | -1.8302 | -0.6900 |
| H    | -5.5169 | -2.5602 | -0.2692 |
| H    | -6.9545 | -1.5850 | 0.0792  |
| H    | -6.7048 | -2.2528 | -1.5693 |
| C    | 6.2171  | -1.8301 | 0.6902  |
| H    | 5.5177  | -2.5592 | 0.2671  |
| H    | 6.9564  | -1.5842 | -0.0772 |
| H    | 6.7031  | -2.2539 | 1.5700  |
| O    | -5.1142 | -0.2902 | -2.2039 |
| O    | 5.1142  | -0.2901 | 2.2041  |
| O    | 2.3724  | -0.5636 | -3.8982 |
| O    | -2.3725 | -0.5634 | 3.8981  |
| C    | -2.7879 | -1.7066 | 4.6305  |
| H    | -2.9869 | -2.5564 | 3.9656  |
| H    | -2.0421 | -1.9971 | 5.3822  |
| H    | -3.7117 | -1.4170 | 5.1341  |
| C    | 2.7878  | -1.7068 | -4.6305 |
| H    | 2.9869  | -2.5566 | -3.9656 |
| H    | 2.0420  | -1.9974 | -5.3822 |
| H    | 3.7116  | -1.4173 | -5.1342 |

Cartesian coordinates of 3,3'-dicarboxyl-1,1',8,8'-tetrahydroxybianthrone-I optimized at the gas-phase  
B3LYP/6-31G(d) level

| atom | X       | Y       | Z       |
|------|---------|---------|---------|
| C    | -0.3147 | -0.6705 | 2.2275  |
| C    | 0.4865  | -0.0042 | 1.2716  |
| C    | 1.6211  | -0.6269 | 0.7701  |
| C    | 1.9690  | -1.9188 | 1.1981  |
| C    | 1.1821  | -2.5997 | 2.1204  |
| C    | 0.0320  | -1.9878 | 2.6405  |
| C    | -1.4616 | 0.0127  | 2.8344  |
| C    | -1.6373 | 1.4436  | 2.6068  |
| C    | -0.8161 | 2.1313  | 1.6760  |
| C    | 0.0809  | 1.3535  | 0.7405  |
| C    | -2.5557 | 2.1786  | 3.4111  |
| C    | -2.6100 | 3.5769  | 3.3029  |
| C    | -1.7687 | 4.2309  | 2.4183  |
| C    | -0.8755 | 3.5185  | 1.6033  |
| C    | -1.7436 | 0.2683  | -0.7084 |
| C    | -1.6295 | -1.0662 | -1.1643 |
| C    | -2.7350 | -1.9544 | -1.0225 |
| C    | -3.9328 | -1.4874 | -0.4615 |
| C    | -4.0299 | -0.1689 | -0.0424 |
| C    | -2.9430 | 0.7082  | -0.1574 |
| C    | -0.5513 | 1.1982  | -0.7485 |
| C    | 0.4873  | 0.8178  | -1.7782 |
| C    | 0.6078  | -0.5302 | -2.1996 |
| C    | -0.4079 | -1.5179 | -1.8264 |
| C    | 1.3556  | 1.7750  | -2.2846 |
| C    | 2.3763  | 1.4055  | -3.1779 |
| C    | 2.5399  | 0.0817  | -3.5671 |
| C    | 1.6581  | -0.8982 | -3.0868 |
| O    | -2.2313 | -0.6160 | 3.6152  |
| O    | -0.2679 | -2.7303 | -2.1539 |
| H    | -0.9165 | 2.2037  | -0.9802 |
| H    | 0.9938  | 1.9338  | 0.5737  |
| O    | -3.3731 | 1.5923  | 4.2958  |
| O    | -0.6909 | -2.6832 | 3.5275  |
| O    | 1.8446  | -2.1553 | -3.5105 |
| O    | -2.6861 | -3.2366 | -1.4102 |
| H    | -3.1995 | 0.6177  | 4.2517  |
| H    | -1.4682 | -2.1193 | 3.7727  |
| H    | 1.1394  | -2.7107 | -3.0904 |
| H    | -1.7757 | -3.3972 | -1.7674 |
| H    | 2.2600  | -0.1336 | 0.0447  |
| H    | 1.4334  | -3.5998 | 2.4509  |
| H    | -3.3110 | 4.1141  | 3.9328  |
| H    | -1.8021 | 5.3149  | 2.3514  |
| H    | -0.2307 | 4.0535  | 0.9145  |
| H    | -4.7634 | -2.1797 | -0.3727 |
| H    | -3.0387 | 1.7361  | 0.1823  |
| H    | 1.2656  | 2.8184  | -2.0072 |
| H    | 3.3278  | -0.2165 | -4.2478 |
| C    | 3.2059  | -2.5225 | 0.6214  |
| O    | 3.9227  | -1.9754 | -0.1923 |
| O    | 3.4632  | -3.7634 | 1.0975  |
| H    | 4.2805  | -4.0566 | 0.6535  |
| C    | 3.2712  | 2.4894  | -3.6800 |
| O    | 4.2312  | 2.0380  | -4.5218 |
| H    | 4.7522  | 2.8216  | -4.7779 |
| O    | 3.1678  | 3.6606  | -3.3775 |
| H    | -4.9641 | 0.1893  | 0.3818  |



Cartesian coordinates of 3,3'-dicarboxyl-1,1',8,8'-tetrahydroxybianthrone-II optimized at the gas-phase  
B3LYP/6-31G(d) level

| atom | X       | Y       | Z       |
|------|---------|---------|---------|
| C    | 2.1231  | -0.1090 | 1.1339  |
| C    | 1.5748  | 1.1175  | 0.6925  |
| C    | 2.4067  | 2.0890  | 0.1533  |
| C    | 3.7864  | 1.8544  | 0.0329  |
| C    | 4.3417  | 0.6464  | 0.4403  |
| C    | 3.5188  | -0.3482 | 0.9891  |
| C    | 1.2704  | -1.1047 | 1.7910  |
| C    | -0.0875 | -0.7333 | 2.1758  |
| C    | -0.6371 | 0.5102  | 1.7691  |
| C    | 0.0809  | 1.3535  | 0.7405  |
| C    | -0.8223 | -1.5690 | 3.0660  |
| C    | -2.0620 | -1.1362 | 3.5618  |
| C    | -2.5592 | 0.1002  | 3.1848  |
| C    | -1.8577 | 0.9238  | 2.2909  |
| C    | -1.8760 | 1.9243  | -0.8249 |
| C    | -3.0933 | 1.2047  | -0.7796 |
| C    | -4.3288 | 1.9146  | -0.7493 |
| C    | -4.3249 | 3.3165  | -0.7961 |
| C    | -3.1204 | 4.0008  | -0.8634 |
| C    | -1.8986 | 3.3146  | -0.8727 |
| C    | -0.5513 | 1.1982  | -0.7485 |
| C    | -0.6162 | -0.2428 | -1.1990 |
| C    | -1.8377 | -0.9573 | -1.1167 |
| C    | -3.0891 | -0.2558 | -0.8196 |
| C    | 0.5258  | -0.8868 | -1.6547 |
| C    | 0.4841  | -2.2506 | -1.9932 |
| C    | -0.6927 | -2.9800 | -1.8753 |
| C    | -1.8647 | -2.3430 | -1.4404 |
| O    | 1.7414  | -2.2368 | 2.0975  |
| O    | -4.1665 | -0.9030 | -0.6892 |
| H    | 0.1608  | 1.7292  | -1.3881 |
| H    | -0.0836 | 2.4084  | 0.9816  |
| O    | -0.3722 | -2.7623 | 3.4759  |
| O    | 4.1012  | -1.4926 | 1.3687  |
| O    | -2.9775 | -3.0851 | -1.3661 |
| O    | -5.5160 | 1.2961  | -0.6814 |
| H    | 0.5085  | -2.9054 | 3.0448  |
| H    | 3.3825  | -2.0838 | 1.7095  |
| H    | -3.7049 | -2.4871 | -1.0569 |
| H    | -5.3343 | 0.3225  | -0.6444 |
| H    | 2.0139  | 3.0435  | -0.1822 |
| H    | 5.4020  | 0.4488  | 0.3436  |
| H    | -2.5974 | -1.7866 | 4.2453  |
| H    | -3.5109 | 0.4382  | 3.5856  |
| H    | -2.2708 | 1.8856  | 2.0068  |
| H    | -5.2782 | 3.8342  | -0.7814 |
| H    | -0.9659 | 3.8705  | -0.9204 |
| H    | 1.4651  | -0.3575 | -1.7606 |
| H    | -0.7351 | -4.0331 | -2.1247 |
| C    | 4.6197  | 2.9468  | -0.5493 |
| O    | 4.1845  | 4.0156  | -0.9283 |
| O    | 5.9346  | 2.6325  | -0.6189 |
| H    | 6.3749  | 3.4077  | -1.0142 |
| C    | 1.7514  | -2.8747 | -2.4752 |
| O    | 1.6189  | -4.1914 | -2.7629 |
| H    | 2.4989  | -4.4903 | -3.0586 |
| O    | 2.8034  | -2.2823 | -2.6029 |
| H    | -3.1248 | 5.0865  | -0.9099 |

Cartesian coordinates of 3,3'-dicarboxyl-1,1',8,8'-tetrahydroxybianthrone-III optimized at the gas-phase  
B3LYP/6-31G(d) level

| atom | X       | Y       | Z       |
|------|---------|---------|---------|
| C    | 0.3511  | 1.8389  | -0.6971 |
| C    | -0.4938 | 1.4577  | 0.3753  |
| C    | -1.8643 | 1.6541  | 0.2718  |
| C    | -2.4175 | 2.1894  | -0.9043 |
| C    | -1.6102 | 2.5263  | -1.9843 |
| C    | -0.2204 | 2.3587  | -1.8923 |
| C    | 1.8082  | 1.8192  | -0.5373 |
| C    | 2.3747  | 1.5737  | 0.7858  |
| C    | 1.5429  | 1.1614  | 1.8543  |
| C    | 0.0931  | 0.8067  | 1.6064  |
| C    | 3.7614  | 1.8044  | 1.0227  |
| C    | 4.2793  | 1.6505  | 2.3174  |
| C    | 3.4419  | 1.2672  | 3.3531  |
| C    | 2.0805  | 1.0183  | 3.1285  |
| C    | 0.4938  | -1.4577 | 0.3751  |
| C    | -0.3511 | -1.8388 | -0.6973 |
| C    | 0.2204  | -2.3585 | -1.8925 |
| C    | 1.6102  | -2.5260 | -1.9845 |
| C    | 2.4175  | -2.1892 | -0.9045 |
| C    | 1.8643  | -1.6540 | 0.2717  |
| C    | -0.0932 | -0.8069 | 1.6063  |
| C    | -1.5430 | -1.1616 | 1.8542  |
| C    | -2.3747 | -1.5739 | 0.7856  |
| C    | -1.8082 | -1.8192 | -0.5375 |
| C    | -2.0806 | -1.0187 | 3.1284  |
| C    | -3.4420 | -1.2676 | 3.3530  |
| C    | -4.2793 | -1.6508 | 2.3172  |
| C    | -3.7614 | -1.8047 | 1.0225  |
| O    | 2.5587  | 2.0996  | -1.5147 |
| O    | -2.5587 | -2.0996 | -1.5149 |
| H    | 0.4868  | -1.1314 | 2.4762  |
| H    | -0.4869 | 1.1312  | 2.4763  |
| O    | 4.6066  | 2.1804  | 0.0545  |
| O    | 0.5151  | 2.7215  | -2.9518 |
| O    | -4.6066 | -2.1806 | 0.0542  |
| O    | -0.5150 | -2.7213 | -2.9521 |
| H    | 4.0852  | 2.2235  | -0.7867 |
| H    | 1.4634  | 2.5523  | -2.7177 |
| H    | -4.0852 | -2.2236 | -0.7869 |
| H    | -1.4633 | -2.5521 | -2.7180 |
| H    | -2.5306 | 1.4036  | 1.0884  |
| H    | -2.0256 | 2.9321  | -2.8985 |
| H    | 5.3364  | 1.8365  | 2.4734  |
| H    | 3.8478  | 1.1568  | 4.3551  |
| H    | 1.4434  | 0.7131  | 3.9546  |
| H    | 2.0256  | -2.9318 | -2.8987 |
| H    | 2.5306  | -1.4036 | 1.0883  |
| H    | -1.4435 | -0.7134 | 3.9545  |
| H    | -3.8479 | -1.1573 | 4.3549  |
| H    | -5.3365 | -1.8369 | 2.4731  |
| C    | -3.8975 | 2.3771  | -0.9417 |
| C    | 3.8976  | -2.3768 | -0.9419 |
| O    | -4.6466 | 2.1218  | -0.0210 |
| O    | 4.6466  | -2.1215 | -0.0212 |
| O    | -4.3402 | 2.8701  | -2.1230 |
| H    | -5.3084 | 2.9464  | -2.0343 |
| O    | 4.3403  | -2.8697 | -2.1233 |
| H    | 5.3084  | -2.9460 | -2.0345 |

Cartesian coordinates of 3,3'-dicarboxyl-1,1',8,8'-tetrahydroxybianthrone-IV optimized at the gas-phase  
B3LYP/6-31G(d) level

| atom | X       | Y       | Z       |
|------|---------|---------|---------|
| C    | -2.7887 | -0.2082 | -0.5690 |
| C    | -1.8649 | 0.8594  | -0.4973 |
| C    | -2.3075 | 2.1328  | -0.1635 |
| C    | -3.6653 | 2.3609  | 0.1129  |
| C    | -4.5863 | 1.3189  | 0.0693  |
| C    | -4.1594 | 0.0261  | -0.2660 |
| C    | -2.3501 | -1.5375 | -1.0098 |
| C    | -1.0139 | -1.6928 | -1.5728 |
| C    | -0.0885 | -0.6171 | -1.5401 |
| C    | -0.3879 | 0.6128  | -0.7141 |
| C    | -0.6769 | -2.8898 | -2.2694 |
| C    | 0.5480  | -2.9774 | -2.9486 |
| C    | 1.4164  | -1.8986 | -2.9406 |
| C    | 1.1080  | -0.7222 | -2.2400 |
| C    | 1.8649  | 0.8594  | 0.4974  |
| C    | 2.7887  | -0.2082 | 0.5690  |
| C    | 4.1594  | 0.0261  | 0.2660  |
| C    | 4.5863  | 1.3190  | -0.0693 |
| C    | 3.6652  | 2.3610  | -0.1129 |
| C    | 2.3075  | 2.1328  | 0.1635  |
| C    | 0.3879  | 0.6127  | 0.7141  |
| C    | 0.0885  | -0.6172 | 1.5401  |
| C    | 1.0139  | -1.6928 | 1.5728  |
| C    | 2.3501  | -1.5375 | 1.0098  |
| C    | -1.1080 | -0.7223 | 2.2400  |
| C    | -1.4163 | -1.8986 | 2.9406  |
| C    | -0.5480 | -2.9774 | 2.9486  |
| C    | 0.6769  | -2.8898 | 2.2694  |
| O    | -3.1576 | -2.5092 | -0.9823 |
| O    | 3.1576  | -2.5092 | 0.9823  |
| H    | -0.0240 | 1.4858  | 1.2303  |
| H    | 0.0240  | 1.4858  | -1.2303 |
| O    | -1.4944 | -3.9494 | -2.3250 |
| O    | -5.0835 | -0.9443 | -0.2889 |
| O    | 1.4944  | -3.9495 | 2.3249  |
| O    | 5.0835  | -0.9443 | 0.2889  |
| H    | -2.3076 | -3.7181 | -1.8087 |
| H    | -4.6139 | -1.7841 | -0.5290 |
| H    | 2.3077  | -3.7181 | 1.8086  |
| H    | 4.6139  | -1.7841 | 0.5290  |
| H    | -1.6212 | 2.9721  | -0.1131 |
| H    | -5.6349 | 1.4810  | 0.2868  |
| H    | 0.7772  | -3.8956 | -3.4789 |
| H    | 2.3550  | -1.9641 | -3.4842 |
| H    | 1.8070  | 0.1072  | -2.2465 |
| H    | 5.6348  | 1.4810  | -0.2868 |
| H    | 1.6211  | 2.9722  | 0.1131  |
| H    | -1.8070 | 0.1071  | 2.2466  |
| H    | -2.3550 | -1.9641 | 3.4842  |
| H    | -0.7772 | -3.8956 | 3.4788  |
| C    | -4.0729 | 3.7551  | 0.4559  |
| C    | 4.0728  | 3.7552  | -0.4558 |
| O    | -3.3110 | 4.6982  | 0.5193  |
| O    | 3.3110  | 4.6982  | -0.5194 |
| O    | -5.4003 | 3.8755  | 0.6975  |
| H    | -5.5495 | 4.8160  | 0.9079  |
| O    | 5.4002  | 3.8755  | -0.6975 |
| H    | 5.5494  | 4.8161  | -0.9080 |

Cartesian coordinates of **9-I** optimized at the gas-phase B3LYP/6-31G(d) level

| atom | X       | Y       | Z       |
|------|---------|---------|---------|
| C    | 0.5984  | 0.3656  | 1.9726  |
| C    | -0.2619 | -0.6633 | 1.5081  |
| C    | -1.5202 | -0.8131 | 2.0722  |
| C    | -1.9884 | 0.0707  | 3.0667  |
| C    | -1.1655 | 1.1027  | 3.4988  |
| C    | 0.1244  | 1.2624  | 2.9713  |
| C    | 1.9818  | 0.4417  | 1.5229  |
| C    | 2.5292  | -0.6492 | 0.7112  |
| C    | 1.6715  | -1.6631 | 0.2144  |
| C    | 0.1712  | -1.5440 | 0.3585  |
| C    | 3.9247  | -0.7141 | 0.4777  |
| C    | 4.4641  | -1.8180 | -0.2338 |
| C    | 3.6105  | -2.8142 | -0.6919 |
| C    | 2.2259  | -2.7317 | -0.4723 |
| C    | -1.9571 | -1.4411 | -1.0762 |
| C    | -2.9369 | -0.4510 | -0.8347 |
| C    | -4.3003 | -0.8418 | -0.7202 |
| C    | -4.6570 | -2.1860 | -0.8921 |
| C    | -3.6929 | -3.1512 | -1.1678 |
| C    | -2.3415 | -2.7659 | -1.2458 |
| C    | -0.4886 | -1.0788 | -1.0547 |
| C    | -0.2170 | 0.3715  | -1.3758 |
| C    | -1.2064 | 1.3589  | -1.1119 |
| C    | -2.5642 | 0.9596  | -0.7483 |
| C    | 1.0090  | 0.7736  | -1.8787 |
| C    | 1.2939  | 2.1334  | -2.0945 |
| C    | 0.3570  | 3.1153  | -1.8040 |
| C    | -0.9179 | 2.7321  | -1.3083 |
| O    | 2.7287  | 1.3934  | 1.8973  |
| O    | -3.4346 | 1.8282  | -0.4456 |
| H    | 0.0252  | -1.7030 | -1.7930 |
| H    | -0.2364 | -2.5481 | 0.5166  |
| C    | -3.3800 | -0.1016 | 3.6240  |
| C    | -4.0880 | -4.5895 | -1.4002 |
| O    | 4.7857  | 0.2198  | 0.9014  |
| O    | 0.8704  | 2.2668  | 3.4530  |
| O    | -1.7978 | 3.7114  | -1.0689 |
| O    | -5.2801 | 0.0339  | -0.4460 |
| H    | 4.2401  | 0.9084  | 1.3644  |
| H    | 1.7398  | 2.2319  | 2.9774  |
| H    | -2.6217 | 3.2716  | -0.7355 |
| H    | -4.8498 | 0.9250  | -0.3644 |
| H    | -2.1675 | -1.6159 | 1.7328  |
| H    | -1.4941 | 1.8065  | 4.2573  |
| H    | 4.0095  | -3.6699 | -1.2250 |
| H    | 1.5858  | -3.5245 | -0.8516 |
| H    | -5.7074 | -2.4478 | -0.8079 |
| H    | -1.5843 | -3.5227 | -1.4405 |
| H    | 1.7714  | 0.0360  | -2.1060 |
| H    | 2.2657  | 2.4087  | -2.4885 |
| H    | -3.5854 | 0.6141  | 4.4251  |
| H    | -4.1325 | 0.0422  | 2.8384  |
| H    | -3.5231 | -1.1130 | 4.0236  |
| H    | -5.0812 | -4.8038 | -0.9947 |
| H    | -3.3724 | -5.2804 | -0.9408 |
| H    | -4.1131 | -4.8175 | -2.4740 |
| O    | 0.5353  | 4.4533  | -1.9624 |
| C    | 1.7953  | 4.9022  | -2.4338 |
| H    | 2.0096  | 4.5192  | -3.4408 |
| H    | 1.7288  | 5.9908  | -2.4685 |
| H    | 2.6072  | 4.6079  | -1.7554 |
| O    | 5.8141  | -1.7934 | -0.4001 |
| C    | 6.4161  | -2.8716 | -1.0961 |
| H    | 7.4854  | -2.6544 | -1.1136 |
| H    | 6.2483  | -3.8282 | -0.5830 |
| H    | 6.0436  | -2.9458 | -2.1270 |

Cartesian coordinates of **9-II** optimized at the gas-phase B3LYP/6-31G(d) level

| atom | X       | Y       | Z       |
|------|---------|---------|---------|
| C    | 2.9369  | -0.4510 | -0.8346 |
| C    | 1.9571  | -1.4411 | -1.0762 |
| C    | 2.3415  | -2.7659 | -1.2458 |
| C    | 3.6929  | -3.1512 | -1.1677 |
| C    | 4.6570  | -2.1860 | -0.8921 |
| C    | 4.3003  | -0.8419 | -0.7202 |
| C    | 2.5642  | 0.9596  | -0.7483 |
| C    | 1.2064  | 1.3589  | -1.1119 |
| C    | 0.2170  | 0.3715  | -1.3758 |
| C    | 0.4886  | -1.0789 | -1.0546 |
| C    | 0.9180  | 2.7321  | -1.3084 |
| C    | -0.3570 | 3.1153  | -1.8040 |
| C    | -1.2939 | 2.1334  | -2.0945 |
| C    | -1.0089 | 0.7736  | -1.8786 |
| C    | 0.2619  | -0.6633 | 1.5081  |
| C    | -0.5984 | 0.3656  | 1.9726  |
| C    | -0.1244 | 1.2624  | 2.9713  |
| C    | 1.1655  | 1.1027  | 3.4988  |
| C    | 1.9884  | 0.0708  | 3.0667  |
| C    | 1.5202  | -0.8130 | 2.0722  |
| C    | -0.1712 | -1.5440 | 0.3586  |
| C    | -1.6715 | -1.6631 | 0.2144  |
| C    | -2.5292 | -0.6492 | 0.7112  |
| C    | -1.9818 | 0.4417  | 1.5229  |
| C    | -2.2259 | -2.7317 | -0.4723 |
| C    | -3.6105 | -2.8141 | -0.6920 |
| C    | -4.4641 | -1.8180 | -0.2338 |
| C    | -3.9247 | -0.7141 | 0.4777  |
| O    | 3.4346  | 1.8281  | -0.4457 |
| O    | -2.7288 | 1.3935  | 1.8973  |
| H    | 0.2364  | -2.5480 | 0.5166  |
| H    | -0.0252 | -1.7030 | -1.7930 |
| C    | 4.0879  | -4.5895 | -1.4002 |
| C    | 3.3799  | -0.1016 | 3.6240  |
| O    | 1.7978  | 3.7114  | -1.0689 |
| O    | 5.2801  | 0.0339  | -0.4460 |
| O    | -4.7857 | 0.2199  | 0.9014  |
| O    | -0.8704 | 2.2668  | 3.4530  |
| H    | 2.6218  | 3.2716  | -0.7355 |
| H    | 4.8498  | 0.9249  | -0.3644 |
| H    | -4.2401 | 0.9084  | 1.3644  |
| H    | -1.7398 | 2.2320  | 2.9774  |
| H    | 1.5843  | -3.5227 | -1.4404 |
| H    | 5.7074  | -2.4479 | -0.8079 |
| H    | -2.2656 | 2.4087  | -2.4885 |
| H    | -1.7714 | 0.0360  | -2.1060 |
| H    | 1.4941  | 1.8065  | 4.2573  |
| H    | 2.1675  | -1.6158 | 1.7328  |
| H    | -1.5858 | -3.5244 | -0.8516 |
| H    | -4.0095 | -3.6699 | -1.2250 |
| H    | 4.1131  | -4.8175 | -2.4740 |
| H    | 5.0812  | -4.8039 | -0.9946 |
| H    | 3.3723  | -5.2804 | -0.9408 |
| H    | 4.1325  | 0.0423  | 2.8384  |
| H    | 3.5854  | 0.6141  | 4.4251  |
| H    | 3.5231  | -1.1129 | 4.0236  |
| O    | -5.8141 | -1.7934 | -0.4002 |
| C    | -6.4161 | -2.8715 | -1.0961 |
| H    | -6.2483 | -3.8282 | -0.5830 |
| H    | -7.4854 | -2.6544 | -1.1136 |
| H    | -6.0436 | -2.9458 | -2.1270 |
| O    | -0.5352 | 4.4533  | -1.9624 |
| C    | -1.7953 | 4.9022  | -2.4338 |
| H    | -1.7288 | 5.9908  | -2.4685 |
| H    | -2.0096 | 4.5192  | -3.4408 |
| H    | -2.6072 | 4.6080  | -1.7554 |

Cartesian coordinates of **9-III** optimized at the gas-phase B3LYP/6-31G(d) level

| atom | X       | Y       | Z       |
|------|---------|---------|---------|
| C    | -0.8693 | -1.1602 | 1.6165  |
| C    | 0.0479  | -0.0804 | 1.5282  |
| C    | 1.3034  | -0.1970 | 2.1061  |
| C    | 1.7114  | -1.3897 | 2.7391  |
| C    | 0.8313  | -2.4626 | 2.7970  |
| C    | -0.4561 | -2.3666 | 2.2486  |
| C    | -2.2462 | -1.0078 | 1.1666  |
| C    | -2.7269 | 0.3218  | 0.7790  |
| C    | -1.8140 | 1.4009  | 0.6665  |
| C    | -0.3244 | 1.1583  | 0.7470  |
| C    | -4.1115 | 0.5309  | 0.5692  |
| C    | -4.5861 | 1.8385  | 0.2854  |
| C    | -3.6796 | 2.8892  | 0.2100  |
| C    | -2.3048 | 2.6675  | 0.3924  |
| C    | -0.0480 | -0.0804 | -1.5282 |
| C    | 0.8693  | -1.1602 | -1.6165 |
| C    | 0.4561  | -2.3666 | -2.2486 |
| C    | -0.8313 | -2.4626 | -2.7971 |
| C    | -1.7114 | -1.3897 | -2.7391 |
| C    | -1.3034 | -0.1970 | -2.1061 |
| C    | 0.3243  | 1.1583  | -0.7470 |
| C    | 1.8140  | 1.4009  | -0.6665 |
| C    | 2.7269  | 0.3218  | -0.7789 |
| C    | 2.2462  | -1.0078 | -1.1665 |
| C    | 2.3048  | 2.6676  | -0.3924 |
| C    | 3.6796  | 2.8892  | -0.2100 |
| C    | 4.5861  | 1.8385  | -0.2854 |
| C    | 4.1115  | 0.5309  | -0.5692 |
| O    | -3.0435 | -1.9916 | 1.1884  |
| O    | 3.0436  | -1.9916 | -1.1885 |
| H    | -0.1395 | 2.0266  | -1.2265 |
| H    | 0.1395  | 2.0266  | 1.2265  |
| C    | 3.1024  | -1.4918 | 3.3146  |
| C    | -3.1023 | -1.4918 | -3.3146 |
| O    | -5.0202 | -0.4522 | 0.6243  |
| O    | -1.2582 | -3.4351 | 2.3597  |
| O    | 5.0202  | -0.4522 | -0.6242 |
| O    | 1.2582  | -3.4351 | -2.3597 |
| H    | -4.5164 | -1.2818 | 0.8360  |
| H    | -2.1158 | -3.1971 | 1.9228  |
| H    | 4.5164  | -1.2818 | -0.8359 |
| H    | 2.1158  | -3.1971 | -1.9227 |
| H    | 1.9952  | 0.6384  | 2.0586  |
| H    | 1.1129  | -3.3981 | 3.2705  |
| H    | -4.0290 | 3.8952  | 0.0069  |
| H    | -1.6212 | 3.5090  | 0.3118  |
| H    | -1.1128 | -3.3981 | -3.2706 |
| H    | -1.9952 | 0.6385  | -2.0587 |
| H    | 1.6211  | 3.5090  | -0.3119 |
| H    | 4.0290  | 3.8952  | -0.0069 |
| H    | 3.3064  | -0.6653 | 4.0059  |
| H    | 3.8554  | -1.4368 | 2.5180  |
| H    | 3.2484  | -2.4322 | 3.8535  |
| H    | -3.3063 | -0.6652 | -4.0059 |
| H    | -3.8554 | -1.4369 | -2.5181 |
| H    | -3.2484 | -2.4321 | -3.8536 |
| O    | 5.9314  | 1.9388  | -0.1107 |
| O    | -5.9315 | 1.9388  | 0.1107  |
| C    | 6.4710  | 3.2202  | 0.1656  |
| H    | 6.0714  | 3.6342  | 1.1016  |
| H    | 7.5477  | 3.0742  | 0.2665  |
| H    | 6.2753  | 3.9263  | -0.6528 |
| C    | -6.4710 | 3.2202  | -0.1656 |
| H    | -6.0715 | 3.6342  | -1.1016 |
| H    | -7.5477 | 3.0741  | -0.2664 |
| H    | -6.2753 | 3.9263  | 0.6528  |

Cartesian coordinates of **9-IV** optimized at the gas-phase B3LYP/6-31G(d) level

| atom | X       | Y       | Z       |
|------|---------|---------|---------|
| C    | 2.6974  | 0.7156  | 0.8770  |
| C    | 1.7891  | 1.7869  | 0.7160  |
| C    | 2.2676  | 3.0627  | 0.4430  |
| C    | 3.6461  | 3.3151  | 0.3120  |
| C    | 4.5424  | 2.2586  | 0.4408  |
| C    | 4.0904  | 0.9614  | 0.7191  |
| C    | 2.2221  | -0.6136 | 1.2552  |
| C    | 0.8299  | -0.7789 | 1.6679  |
| C    | -0.0872 | 0.3005  | 1.5380  |
| C    | 0.2976  | 1.5343  | 0.7566  |
| C    | 0.4371  | -1.9795 | 2.3094  |
| C    | -0.8700 | -2.0861 | 2.8553  |
| C    | -1.7358 | -1.0060 | 2.7550  |
| C    | -1.3472 | 0.1752  | 2.0992  |
| C    | -1.7892 | 1.7869  | -0.7159 |
| C    | -2.6975 | 0.7156  | -0.8770 |
| C    | -4.0905 | 0.9613  | -0.7191 |
| C    | -4.5426 | 2.2584  | -0.4407 |
| C    | -3.6463 | 3.3149  | -0.3116 |
| C    | -2.2678 | 3.0627  | -0.4427 |
| C    | -0.2978 | 1.5345  | -0.7565 |
| C    | 0.0872  | 0.3008  | -1.5380 |
| C    | -0.8299 | -0.7788 | -1.6678 |
| C    | -2.2221 | -0.6136 | -1.2552 |
| C    | 1.3471  | 0.1756  | -2.0993 |
| C    | 1.7358  | -1.0056 | -2.7552 |
| C    | 0.8702  | -2.0857 | -2.8554 |
| C    | -0.4369 | -1.9794 | -2.3094 |
| O    | 3.0322  | -1.5853 | 1.3092  |
| O    | -3.0321 | -1.5852 | -1.3094 |
| H    | 0.1783  | 2.4042  | -1.2214 |
| H    | -0.1785 | 2.4039  | 1.2217  |
| C    | 4.1402  | 4.7185  | 0.0566  |
| C    | -4.1406 | 4.7182  | -0.0561 |
| O    | 1.2457  | -3.0356 | 2.4553  |
| O    | 5.0107  | -0.0087 | 0.8287  |
| O    | -1.2454 | -3.0356 | -2.4552 |
| O    | -5.0106 | -0.0089 | -0.8289 |
| H    | 2.1070  | -2.7888 | 2.0297  |
| H    | 4.5165  | -0.8490 | 1.0154  |
| H    | -2.1067 | -2.7887 | -2.0298 |
| H    | -4.5164 | -0.8492 | -1.0156 |
| H    | 1.5646  | 3.8853  | 0.3287  |
| H    | 5.6121  | 2.4119  | 0.3349  |
| H    | -2.7309 | -1.0652 | 3.1811  |
| H    | -2.0557 | 0.9942  | 2.0325  |
| H    | -5.6123 | 2.4116  | -0.3346 |
| H    | -1.5648 | 3.8854  | -0.3284 |
| H    | 2.0555  | 0.9947  | -2.0327 |
| H    | 2.7310  | -1.0647 | -3.1812 |
| H    | 4.1142  | 5.3144  | 0.9784  |
| H    | 3.5133  | 5.2354  | -0.6786 |
| H    | 5.1712  | 4.7212  | -0.3094 |
| H    | -4.1147 | 5.3143  | -0.9779 |
| H    | -5.1715 | 4.7209  | 0.3100  |
| H    | -3.5137 | 5.2352  | 0.6791  |
| O    | 1.1490  | -3.2728 | -3.4556 |
| O    | -1.1487 | -3.2732 | 3.4556  |
| C    | 2.4433  | -3.4481 | -4.0080 |
| H    | 2.6395  | -2.7277 | -4.8137 |
| H    | 3.2245  | -3.3545 | -3.2418 |
| H    | 2.4569  | -4.4596 | -4.4172 |
| C    | -2.4431 | -3.4488 | 4.0074  |
| H    | -2.6398 | -2.7286 | 4.8133  |
| H    | -3.2241 | -3.3550 | 3.2410  |
| H    | -2.4570 | -4.4604 | 4.4162  |

Cartesian coordinates of 7,7'-methylated 1-I optimized at the gas-phase B3LYP/6-31G(d) level

| atom | X       | Y       | Z       |
|------|---------|---------|---------|
| C    | -1.0283 | -0.6305 | 1.7145  |
| C    | -0.0580 | 0.3749  | 1.4680  |
| C    | 1.1605  | 0.3308  | 2.1295  |
| C    | 1.4820  | -0.7275 | 3.0048  |
| C    | 0.5515  | -1.7360 | 3.2197  |
| C    | -0.7033 | -1.7014 | 2.5938  |
| C    | -2.3766 | -0.5132 | 1.1751  |
| C    | -2.7713 | 0.7265  | 0.5022  |
| C    | -1.8046 | 1.7172  | 0.2137  |
| C    | -0.3332 | 1.4521  | 0.4435  |
| C    | -4.1379 | 0.9638  | 0.1890  |
| C    | -4.5463 | 2.1882  | -0.3815 |
| C    | -3.5688 | 3.1457  | -0.6311 |
| C    | -2.2159 | 2.9213  | -0.3459 |
| C    | 1.8918  | 1.4129  | -0.8395 |
| C    | 2.7856  | 0.3282  | -0.6889 |
| C    | 4.1579  | 0.5959  | -0.4265 |
| C    | 4.6107  | 1.9208  | -0.3653 |
| C    | 3.7332  | 2.9847  | -0.5516 |
| C    | 2.3699  | 2.7160  | -0.7774 |
| C    | 0.4065  | 1.1598  | -0.9750 |
| C    | 0.0703  | -0.2042 | -1.5315 |
| C    | 0.9708  | -1.2862 | -1.3559 |
| C    | 2.3176  | -1.0475 | -0.8442 |
| C    | -1.1401 | -0.4316 | -2.1725 |
| C    | -1.4810 | -1.7217 | -2.6052 |
| C    | -0.6456 | -2.8150 | -2.4137 |
| C    | 0.5969  | -2.5901 | -1.7822 |
| O    | -3.2252 | -1.4354 | 1.3594  |
| O    | 3.1047  | -2.0145 | -0.6201 |
| H    | -0.0084 | 1.9209  | -1.6437 |
| H    | 0.1274  | 2.3842  | 0.7869  |
| C    | 2.8355  | -0.7608 | 3.6706  |
| C    | 4.2331  | 4.4089  | -0.5302 |
| O    | -5.0961 | 0.0512  | 0.4220  |
| O    | -1.5609 | -2.6945 | 2.8695  |
| O    | 1.4001  | -3.6550 | -1.6252 |
| O    | 5.0567  | -0.3811 | -0.2266 |
| H    | -4.6443 | -0.7432 | 0.8114  |
| H    | -2.3888 | -2.5090 | 2.3559  |
| H    | 2.2232  | -3.3309 | -1.1759 |
| H    | 4.5659  | -1.2400 | -0.3097 |
| H    | 1.8905  | 1.1166  | 1.9618  |
| H    | 0.7654  | -2.5691 | 3.8820  |
| H    | -3.8694 | 4.0987  | -1.0608 |
| H    | -1.4854 | 3.6968  | -0.5627 |
| H    | 5.6659  | 2.0889  | -0.1726 |
| H    | 1.6792  | 3.5472  | -0.9040 |
| H    | -1.8307 | 0.3891  | -2.3352 |
| H    | -2.4349 | -1.8755 | -3.1045 |
| H    | 2.9192  | -1.5942 | 4.3738  |
| H    | 3.6323  | -0.8656 | 2.9232  |
| H    | 3.0298  | 0.1696  | 4.2177  |
| H    | 5.2230  | 4.4804  | -0.0703 |
| H    | 3.5498  | 5.0641  | 0.0216  |
| H    | 4.3111  | 4.8096  | -1.5495 |
| C    | -6.0034 | 2.4127  | -0.6898 |
| H    | -6.6179 | 2.3246  | 0.2139  |
| H    | -6.1632 | 3.4049  | -1.1224 |
| H    | -6.3805 | 1.6619  | -1.3941 |
| C    | -1.0094 | -4.2068 | -2.8593 |
| H    | -1.9928 | -4.2186 | -3.3388 |
| H    | -0.2721 | -4.6030 | -3.5673 |
| H    | -1.0292 | -4.9009 | -2.0109 |



Cartesian coordinates of 7,7'-methylated 1-II optimized at the gas-phase B3LYP/6-31G(d) level

| atom | X       | Y       | Z       |
|------|---------|---------|---------|
| C    | -2.7856 | 0.3282  | -0.6889 |
| C    | -1.8918 | 1.4129  | -0.8396 |
| C    | -2.3699 | 2.7160  | -0.7774 |
| C    | -3.7332 | 2.9847  | -0.5516 |
| C    | -4.6107 | 1.9207  | -0.3654 |
| C    | -4.1579 | 0.5958  | -0.4265 |
| C    | -2.3176 | -1.0476 | -0.8442 |
| C    | -0.9708 | -1.2862 | -1.3559 |
| C    | -0.0703 | -0.2042 | -1.5315 |
| C    | -0.4065 | 1.1598  | -0.9750 |
| C    | -0.5969 | -2.5901 | -1.7822 |
| C    | 0.6457  | -2.8150 | -2.4137 |
| C    | 1.4810  | -1.7217 | -2.6052 |
| C    | 1.1401  | -0.4316 | -2.1725 |
| C    | 0.0580  | 0.3749  | 1.4680  |
| C    | 1.0283  | -0.6305 | 1.7145  |
| C    | 0.7033  | -1.7013 | 2.5938  |
| C    | -0.5516 | -1.7359 | 3.2197  |
| C    | -1.4820 | -0.7274 | 3.0048  |
| C    | -1.1605 | 0.3308  | 2.1295  |
| C    | 0.3332  | 1.4521  | 0.4434  |
| C    | 1.8046  | 1.7172  | 0.2137  |
| C    | 2.7713  | 0.7266  | 0.5022  |
| C    | 2.3766  | -0.5132 | 1.1751  |
| C    | 2.2159  | 2.9213  | -0.3459 |
| C    | 3.5688  | 3.1457  | -0.6311 |
| C    | 4.5463  | 2.1882  | -0.3815 |
| C    | 4.1379  | 0.9638  | 0.1890  |
| O    | -3.1046 | -2.0146 | -0.6200 |
| O    | 3.2252  | -1.4354 | 1.3594  |
| H    | -0.1275 | 2.3843  | 0.7869  |
| H    | 0.0084  | 1.9209  | -1.6437 |
| C    | -4.2331 | 4.4089  | -0.5303 |
| C    | -2.8355 | -0.7608 | 3.6706  |
| O    | -1.4001 | -3.6550 | -1.6252 |
| O    | -5.0567 | -0.3811 | -0.2267 |
| O    | 5.0961  | 0.0512  | 0.4220  |
| O    | 1.5609  | -2.6944 | 2.8695  |
| H    | -2.2232 | -3.3309 | -1.1759 |
| H    | -4.5659 | -1.2400 | -0.3097 |
| H    | 4.6443  | -0.7432 | 0.8114  |
| H    | 2.3887  | -2.5090 | 2.3560  |
| H    | -1.6792 | 3.5472  | -0.9041 |
| H    | -5.6659 | 2.0888  | -0.1726 |
| H    | 2.4350  | -1.8754 | -3.1045 |
| H    | 1.8307  | 0.3891  | -2.3352 |
| H    | -0.7655 | -2.5691 | 3.8820  |
| H    | -1.8905 | 1.1167  | 1.9618  |
| H    | 1.4854  | 3.6968  | -0.5628 |
| H    | 3.8694  | 4.0987  | -1.0608 |
| H    | -4.3111 | 4.8096  | -1.5495 |
| H    | -5.2231 | 4.4804  | -0.0704 |
| H    | -3.5498 | 5.0641  | 0.0216  |
| H    | -3.6323 | -0.8653 | 2.9232  |
| H    | -2.9193 | -1.5943 | 4.3737  |
| H    | -3.0297 | 0.1696  | 4.2178  |
| C    | 1.0095  | -4.2068 | -2.8592 |
| H    | 0.2721  | -4.6030 | -3.5672 |
| H    | 1.9928  | -4.2186 | -3.3388 |
| H    | 1.0293  | -4.9009 | -2.0108 |
| C    | 6.0034  | 2.4127  | -0.6898 |
| H    | 6.1632  | 3.4049  | -1.1225 |
| H    | 6.6179  | 2.3247  | 0.2139  |
| H    | 6.3805  | 1.6618  | -1.3941 |

Cartesian coordinates of 7,7'-methylated 1-III optimized at the gas-phase B3LYP/6-31G(d) level

| atom | X       | Y       | Z       |
|------|---------|---------|---------|
| C    | 0.9063  | -0.9659 | -1.6023 |
| C    | -0.0201 | 0.1067  | -1.5263 |
| C    | -1.2667 | -0.0185 | -2.1212 |
| C    | -1.6569 | -1.2144 | -2.7596 |
| C    | -0.7683 | -2.2808 | -2.8053 |
| C    | 0.5112  | -2.1750 | -2.2401 |
| C    | 2.2765  | -0.8002 | -1.1367 |
| C    | 2.7403  | 0.5321  | -0.7422 |
| C    | 1.8210  | 1.6009  | -0.6357 |
| C    | 0.3339  | 1.3490  | -0.7423 |
| C    | 4.1232  | 0.7672  | -0.5116 |
| C    | 4.5960  | 2.0636  | -0.2169 |
| C    | 3.6641  | 3.0944  | -0.1500 |
| C    | 2.2948  | 2.8754  | -0.3477 |
| C    | 0.0201  | 0.1065  | 1.5264  |
| C    | -0.9063 | -0.9661 | 1.6021  |
| C    | -0.5112 | -2.1754 | 2.2398  |
| C    | 0.7682  | -2.2813 | 2.8050  |
| C    | 1.6568  | -1.2148 | 2.7596  |
| C    | 1.2666  | -0.0189 | 2.1214  |
| C    | -0.3339 | 1.3489  | 0.7426  |
| C    | -1.8209 | 1.6008  | 0.6360  |
| C    | -2.7403 | 0.5320  | 0.7422  |
| C    | -2.2765 | -0.8004 | 1.1366  |
| C    | -2.2947 | 2.8754  | 0.3482  |
| C    | -3.6640 | 3.0944  | 0.1504  |
| C    | -4.5959 | 2.0636  | 0.2171  |
| C    | -4.1231 | 0.7672  | 0.5116  |
| O    | 3.0839  | -1.7765 | -1.1512 |
| O    | -3.0839 | -1.7767 | 1.1510  |
| H    | 0.1246  | 2.2146  | 1.2315  |
| H    | -0.1246 | 2.2148  | -1.2311 |
| C    | -3.0384 | -1.3264 | -3.3556 |
| C    | 3.0383  | -1.3269 | 3.3556  |
| O    | 5.0359  | -0.2189 | -0.5610 |
| O    | 1.3234  | -3.2367 | -2.3413 |
| O    | -5.0359 | -0.2189 | 0.5607  |
| O    | -1.3235 | -3.2371 | 2.3408  |
| H    | 4.5419  | -1.0526 | -0.7811 |
| H    | 2.1741  | -2.9911 | -1.8953 |
| H    | -4.5419 | -1.0527 | 0.7808  |
| H    | -2.1741 | -2.9914 | 1.8948  |
| C    | 6.0691  | 2.2827  | 0.0085  |
| C    | -6.0690 | 2.2827  | -0.0084 |
| H    | -1.9644 | 0.8125  | -2.0854 |
| H    | -1.0363 | -3.2182 | -3.2830 |
| H    | 4.0146  | 4.1013  | 0.0657  |
| H    | 1.6005  | 3.7088  | -0.2736 |
| H    | 1.0362  | -3.2187 | 3.2826  |
| H    | 1.9644  | 0.8122  | 2.0857  |
| H    | -1.6005 | 3.7088  | 0.2743  |
| H    | -4.0145 | 4.1013  | -0.0652 |
| H    | -3.2385 | -0.5007 | -4.0490 |
| H    | -3.8033 | -1.2783 | -2.5699 |
| H    | -3.1696 | -2.2673 | -3.8975 |
| H    | 3.2384  | -0.5013 | 4.0491  |
| H    | 3.8032  | -1.2789 | 2.5699  |
| H    | 3.1694  | -2.2679 | 3.8974  |
| H    | 6.6543  | 1.9759  | -0.8663 |
| H    | 6.2805  | 3.3362  | 0.2149  |
| H    | 6.4355  | 1.6839  | 0.8508  |
| H    | -6.6542 | 1.9758  | 0.8663  |
| H    | -6.2804 | 3.3363  | -0.2146 |
| H    | -6.4353 | 1.6842  | -0.8508 |

Cartesian coordinates of 7,7'-methylated 1-IV optimized at the gas-phase B3LYP/6-31G(d) level

| atom | X       | Y       | Z       |
|------|---------|---------|---------|
| C    | -2.8160 | 0.5287  | -0.4764 |
| C    | -1.8792 | 1.5864  | -0.4321 |
| C    | -2.2952 | 2.8632  | -0.0750 |
| C    | -3.6369 | 3.1295  | 0.2577  |
| C    | -4.5572 | 2.0863  | 0.2429  |
| C    | -4.1684 | 0.7886  | -0.1171 |
| C    | -2.4171 | -0.7991 | -0.9378 |
| C    | -1.0979 | -0.9769 | -1.5395 |
| C    | -0.1568 | 0.0844  | -1.5289 |
| C    | -0.4130 | 1.3218  | -0.6992 |
| C    | -0.7984 | -2.1768 | -2.2418 |
| C    | 0.4098  | -2.3123 | -2.9591 |
| C    | 1.2858  | -1.2342 | -2.9593 |
| C    | 1.0179  | -0.0500 | -2.2573 |
| C    | 1.8792  | 1.5864  | 0.4321  |
| C    | 2.8160  | 0.5287  | 0.4764  |
| C    | 4.1684  | 0.7886  | 0.1171  |
| C    | 4.5572  | 2.0863  | -0.2429 |
| C    | 3.6369  | 3.1295  | -0.2577 |
| C    | 2.2952  | 2.8632  | 0.0750  |
| C    | 0.4130  | 1.3217  | 0.6992  |
| C    | 0.1568  | 0.0844  | 1.5289  |
| C    | 1.0979  | -0.9769 | 1.5395  |
| C    | 2.4171  | -0.7991 | 0.9378  |
| C    | -1.0179 | -0.0500 | 2.2573  |
| C    | -1.2858 | -1.2342 | 2.9593  |
| C    | -0.4098 | -2.3123 | 2.9591  |
| C    | 0.7984  | -2.1768 | 2.2418  |
| O    | -3.2416 | -1.7595 | -0.8948 |
| O    | 3.2416  | -1.7595 | 0.8948  |
| H    | 0.0094  | 2.1866  | 1.2360  |
| H    | -0.0094 | 2.1866  | -1.2360 |
| C    | -4.0680 | 4.5338  | 0.6053  |
| C    | 4.0680  | 4.5338  | -0.6053 |
| O    | -1.6431 | -3.2207 | -2.2741 |
| O    | -5.1086 | -0.1679 | -0.1097 |
| O    | 1.6431  | -3.2207 | 2.2741  |
| O    | 5.1086  | -0.1679 | 0.1097  |
| H    | -2.4382 | -2.9638 | -1.7386 |
| H    | -4.6586 | -1.0114 | -0.3760 |
| H    | 2.4382  | -2.9638 | 1.7386  |
| H    | 4.6586  | -1.0114 | 0.3760  |
| C    | 0.6938  | -3.5935 | -3.6979 |
| C    | -0.6938 | -3.5935 | 3.6979  |
| H    | -1.5723 | 3.6763  | -0.0529 |
| H    | -5.5981 | 2.2505  | 0.5041  |
| H    | 2.2133  | -1.3152 | -3.5217 |
| H    | 1.7373  | 0.7616  | -2.2826 |
| H    | 5.5982  | 2.2505  | -0.5041 |
| H    | 1.5723  | 3.6763  | 0.0529  |
| H    | -1.7373 | 0.7616  | 2.2826  |
| H    | -2.2132 | -1.3152 | 3.5217  |
| H    | -4.1276 | 5.1580  | -0.2959 |
| H    | -3.3535 | 5.0147  | 1.2829  |
| H    | -5.0528 | 4.5455  | 1.0814  |
| H    | 4.1271  | 5.1581  | 0.2959  |
| H    | 5.0530  | 4.5456  | -1.0810 |
| H    | 3.3537  | 5.0146  | -1.2833 |
| H    | -0.0861 | -3.8059 | -4.4386 |
| H    | 1.6576  | -3.5415 | -4.2130 |
| H    | 0.7124  | -4.4494 | -3.0130 |
| H    | -1.6576 | -3.5415 | 4.2130  |
| H    | 0.0861  | -3.8059 | 4.4386  |
| H    | -0.7124 | -4.4494 | 3.0130  |

Cartesian coordinates of 7,7'-methylated 2-I optimized at the gas-phase B3LYP/6-31G(d) level

| atom | X       | Y       | Z       |
|------|---------|---------|---------|
| C    | -0.6492 | -0.7018 | 1.9273  |
| C    | 0.2176  | 0.3654  | 1.5787  |
| C    | 1.4795  | 0.4420  | 2.1500  |
| C    | 1.9459  | -0.5544 | 3.0319  |
| C    | 1.1159  | -1.6224 | 3.3475  |
| C    | -0.1789 | -1.7089 | 2.8149  |
| C    | -2.0384 | -0.7096 | 1.4815  |
| C    | -2.5734 | 0.4602  | 0.7979  |
| C    | -1.7169 | 1.5163  | 0.4103  |
| C    | -0.2154 | 1.3814  | 0.5459  |
| C    | -3.9756 | 0.5776  | 0.5603  |
| C    | -4.5175 | 1.7331  | -0.0285 |
| C    | -3.6332 | 2.7634  | -0.3706 |
| C    | -2.2493 | 2.6599  | -0.1629 |
| C    | 1.9171  | 1.4803  | -0.8841 |
| C    | 2.9034  | 0.4738  | -0.7817 |
| C    | 4.2647  | 0.8554  | -0.6284 |
| C    | 4.6118  | 2.2134  | -0.6248 |
| C    | 3.6401  | 3.2001  | -0.7613 |
| C    | 2.2904  | 2.8189  | -0.8794 |
| C    | 0.4501  | 1.1085  | -0.9103 |
| C    | 0.1881  | -0.2941 | -1.4101 |
| C    | 1.1846  | -1.2947 | -1.2725 |
| C    | 2.5359  | -0.9397 | -0.8763 |
| C    | -1.0425 | -0.6221 | -1.9505 |
| C    | -1.3154 | -1.9499 | -2.3221 |
| C    | -0.3820 | -2.9796 | -2.1612 |
| C    | 0.8768  | -2.6397 | -1.6367 |
| O    | -2.7933 | -1.6920 | 1.7595  |
| O    | 3.4183  | -1.8345 | -0.6945 |
| H    | -0.0666 | 1.8143  | -1.5685 |
| H    | 0.1851  | 2.3596  | 0.8314  |
| C    | 3.3421  | -0.4591 | 3.5962  |
| C    | 4.0229  | 4.6598  | -0.8022 |
| O    | -4.8261 | -0.4059 | 0.8951  |
| O    | -0.9334 | -2.7543 | 3.1862  |
| O    | 1.7807  | -3.6241 | -1.5072 |
| O    | 5.2522  | -0.0424 | -0.4797 |
| H    | -4.2735 | -1.1401 | 1.2793  |
| H    | -1.8080 | -2.6503 | 2.7295  |
| H    | 2.6045  | -3.2086 | -1.1345 |
| H    | 4.8256  | -0.9388 | -0.5093 |
| H    | 2.1303  | 1.2757  | 1.9054  |
| H    | 1.4419  | -2.4102 | 4.0196  |
| H    | -1.6194 | 3.4931  | -0.4596 |
| H    | 5.6615  | 2.4691  | -0.5158 |
| H    | 1.5269  | 3.5892  | -0.9683 |
| H    | -1.8191 | 0.1211  | -2.0881 |
| H    | 3.5418  | -1.2573 | 4.3168  |
| H    | 4.0891  | -0.5299 | 2.7954  |
| H    | 3.5011  | 0.5028  | 4.0986  |
| H    | 5.0360  | 4.8206  | -0.4218 |
| H    | 3.3326  | 5.2708  | -0.2098 |
| H    | 3.9905  | 5.0426  | -1.8308 |
| C    | -6.0008 | 1.8616  | -0.2772 |
| H    | -6.4458 | 2.6856  | 0.2995  |
| H    | -6.2244 | 2.0361  | -1.3396 |
| H    | -6.5136 | 0.9453  | 0.0172  |
| C    | -0.7097 | -4.4006 | -2.5505 |
| H    | -0.9215 | -4.4950 | -3.6255 |
| H    | 0.1314  | -5.0575 | -2.3261 |
| H    | -1.5810 | -4.7847 | -2.0008 |
| O    | -2.5485 | -2.1812 | -2.8453 |
| H    | -2.6386 | -3.1245 | -3.0535 |
| O    | -4.0723 | 3.9234  | -0.9303 |
| H    | -5.0380 | 3.8925  | -1.0178 |

Cartesian coordinates of 7,7'-methylated 2-II optimized at the gas-phase B3LYP/6-31G(d) level

| atom | X       | Y       | Z       |
|------|---------|---------|---------|
| C    | -2.9032 | 0.4743  | -0.7814 |
| C    | -1.9168 | 1.4808  | -0.8838 |
| C    | -2.2901 | 2.8194  | -0.8791 |
| C    | -3.6397 | 3.2007  | -0.7609 |
| C    | -4.6115 | 2.2141  | -0.6243 |
| C    | -4.2644 | 0.8560  | -0.6278 |
| C    | -2.5359 | -0.9392 | -0.8762 |
| C    | -1.1846 | -1.2943 | -1.2726 |
| C    | -0.1880 | -0.2938 | -1.4100 |
| C    | -0.4500 | 1.1088  | -0.9101 |
| C    | -0.8770 | -2.6392 | -1.6371 |
| C    | 0.3818  | -2.9791 | -2.1615 |
| C    | 1.3153  | -1.9495 | -2.3222 |
| C    | 1.0426  | -0.6218 | -1.9505 |
| C    | -0.2176 | 0.3650  | 1.5787  |
| C    | 0.6491  | -0.7023 | 1.9271  |
| C    | 0.1785  | -1.7098 | 2.8140  |
| C    | -1.1165 | -1.6237 | 3.3461  |
| C    | -1.9464 | -0.5556 | 3.0307  |
| C    | -1.4797 | 0.4414  | 2.1497  |
| C    | 0.2156  | 1.3814  | 0.5463  |
| C    | 1.7171  | 1.5162  | 0.4108  |
| C    | 2.5735  | 0.4601  | 0.7983  |
| C    | 2.0385  | -0.7099 | 1.4818  |
| C    | 2.2495  | 2.6599  | -0.1622 |
| C    | 3.6334  | 2.7633  | -0.3700 |
| C    | 4.5177  | 1.7329  | -0.0280 |
| C    | 3.9757  | 0.5774  | 0.5607  |
| O    | -3.4183 | -1.8340 | -0.6946 |
| O    | 2.7932  | -1.6924 | 1.7592  |
| H    | -0.1849 | 2.3595  | 0.8320  |
| H    | 0.0669  | 1.8147  | -1.5680 |
| C    | -4.0222 | 4.6605  | -0.8012 |
| C    | -3.3430 | -0.4607 | 3.5942  |
| O    | -1.7809 | -3.6235 | -1.5077 |
| O    | -5.2520 | -0.0417 | -0.4789 |
| O    | 4.8262  | -0.4061 | 0.8953  |
| O    | 0.9330  | -2.7553 | 3.1853  |
| H    | -2.6047 | -3.2080 | -1.1351 |
| H    | -4.8255 | -0.9381 | -0.5089 |
| H    | 4.2737  | -1.1403 | 1.2797  |
| H    | 1.8078  | -2.6508 | 2.7293  |
| H    | -1.5265 | 3.5896  | -0.9681 |
| H    | -5.6611 | 2.4698  | -0.5152 |
| H    | 1.8192  | 0.1214  | -2.0880 |
| H    | -1.4427 | -2.4119 | 4.0177  |
| H    | -2.1303 | 1.2753  | 1.9053  |
| H    | 1.6196  | 3.4931  | -0.4588 |
| H    | -5.0389 | 4.8202  | -0.4299 |
| H    | -3.3376 | 5.2696  | -0.2001 |
| H    | -3.9797 | 5.0465  | -1.8281 |
| H    | -3.5423 | -1.2582 | 4.3158  |
| H    | -4.0895 | -0.5334 | 2.7931  |
| H    | -3.5033 | 0.5017  | 4.0951  |
| C    | 0.7093  | -4.4001 | -2.5511 |
| H    | 0.9223  | -4.4940 | -3.6259 |
| H    | 1.5799  | -4.7849 | -2.0006 |
| H    | -0.1323 | -5.0567 | -2.3279 |
| C    | 6.0010  | 1.8614  | -0.2766 |
| H    | 6.4456  | 2.6862  | 0.2991  |
| H    | 6.5139  | 0.9456  | 0.0190  |
| H    | 6.2248  | 2.0345  | -1.3392 |
| O    | 4.0726  | 3.9232  | -0.9296 |
| H    | 5.0382  | 3.8922  | -1.0175 |
| O    | 2.5484  | -2.1809 | -2.8454 |
| H    | 2.6384  | -3.1242 | -3.0536 |

Cartesian coordinates of 7,7'-methylated 2-III optimized at the gas-phase B3LYP/6-31G(d) level

| atom | X       | Y       | Z       |
|------|---------|---------|---------|
| C    | 0.8978  | -1.2186 | -1.6162 |
| C    | -0.0300 | -0.1495 | -1.5282 |
| C    | -1.2816 | -0.2742 | -2.1131 |
| C    | -1.6746 | -1.4677 | -2.7529 |
| C    | -0.7833 | -2.5313 | -2.8111 |
| C    | 0.5009  | -2.4248 | -2.2567 |
| C    | 2.2731  | -1.0496 | -1.1610 |
| C    | 2.7329  | 0.2749  | -0.7632 |
| C    | 1.8164  | 1.3449  | -0.6463 |
| C    | 0.3277  | 1.0927  | -0.7444 |
| C    | 4.1195  | 0.5171  | -0.5331 |
| C    | 4.5910  | 1.8069  | -0.2344 |
| C    | 3.6496  | 2.8419  | -0.1628 |
| C    | 2.2776  | 2.6187  | -0.3553 |
| C    | 0.0300  | -0.1492 | 1.5279  |
| C    | -0.8978 | -1.2184 | 1.6162  |
| C    | -0.5007 | -2.4245 | 2.2569  |
| C    | 0.7837  | -2.5309 | 2.8109  |
| C    | 1.6749  | -1.4673 | 2.7525  |
| C    | 1.2817  | -0.2739 | 2.1126  |
| C    | -0.3278 | 1.0928  | 0.7440  |
| C    | -1.8164 | 1.3449  | 0.6459  |
| C    | -2.7329 | 0.2750  | 0.7634  |
| C    | -2.2732 | -1.0495 | 1.1613  |
| C    | -2.2778 | 2.6187  | 0.3545  |
| C    | -3.6499 | 2.8417  | 0.1623  |
| C    | -4.5912 | 1.8066  | 0.2343  |
| C    | -4.1196 | 0.5171  | 0.5336  |
| O    | 3.0822  | -2.0276 | -1.1901 |
| O    | -3.0826 | -2.0271 | 1.1908  |
| H    | 0.1324  | 1.9592  | 1.2299  |
| H    | -0.1325 | 1.9590  | -1.2304 |
| C    | -3.0614 | -1.5813 | -3.3368 |
| C    | 3.0618  | -1.5807 | 3.3361  |
| O    | 5.0214  | -0.4776 | -0.5911 |
| O    | 1.3154  | -3.4844 | -2.3709 |
| O    | -5.0213 | -0.4778 | 0.5927  |
| O    | -1.3150 | -3.4842 | 2.3713  |
| H    | 4.5145  | -1.3053 | -0.8182 |
| H    | 2.1695  | -3.2369 | -1.9319 |
| H    | -4.5141 | -1.3054 | 0.8196  |
| H    | -2.1692 | -3.2368 | 1.9324  |
| C    | 6.0600  | 2.0684  | -0.0054 |
| C    | -6.0603 | 2.0680  | 0.0056  |
| H    | -1.9804 | 0.5556  | -2.0677 |
| H    | -1.0528 | -3.4672 | -3.2908 |
| H    | 1.6003  | 3.4629  | -0.2702 |
| H    | 1.0533  | -3.4668 | 3.2907  |
| H    | 1.9804  | 0.5560  | 2.0670  |
| H    | -1.6005 | 3.4629  | 0.2690  |
| H    | -3.2714 | -0.7521 | -4.0232 |
| H    | -3.8192 | -1.5419 | -2.5438 |
| H    | -3.1937 | -2.5192 | -3.8837 |
| H    | 3.2719  | -0.7516 | 4.0225  |
| H    | 3.8194  | -1.5412 | 2.5429  |
| H    | 3.1944  | -2.5186 | 3.8829  |
| H    | 6.4715  | 2.7756  | -0.7403 |
| H    | 6.2543  | 2.4762  | 0.9971  |
| H    | 6.6270  | 1.1412  | -0.0960 |
| H    | -6.4734 | 2.7695  | 0.7450  |
| H    | -6.2539 | 2.4827  | -0.9942 |
| H    | -6.6262 | 1.1395  | 0.0888  |
| O    | -4.0192 | 4.1229  | -0.1078 |
| H    | -4.9831 | 4.1659  | -0.2083 |
| O    | 4.0187  | 4.1231  | 0.1075  |
| H    | 4.9827  | 4.1662  | 0.2083  |

Cartesian coordinates of 7,7'-methylated 2-IV optimized at the gas-phase B3LYP/6-31G(d) level

| atom | X       | Y       | Z       |
|------|---------|---------|---------|
| C    | 2.7148  | 0.6005  | 0.8585  |
| C    | 1.8011  | 1.6659  | 0.6944  |
| C    | 2.2700  | 2.9430  | 0.4119  |
| C    | 3.6468  | 3.2023  | 0.2748  |
| C    | 4.5488  | 2.1522  | 0.4105  |
| C    | 4.1053  | 0.8537  | 0.6986  |
| C    | 2.2441  | -0.7300 | 1.2430  |
| C    | 0.8601  | -0.9009 | 1.6511  |
| C    | -0.0638 | 0.1695  | 1.5325  |
| C    | 0.3102  | 1.4080  | 0.7500  |
| C    | 0.4504  | -2.1069 | 2.2946  |
| C    | -0.8367 | -2.2360 | 2.8438  |
| C    | -1.6961 | -1.1366 | 2.7430  |
| C    | -1.3232 | 0.0528  | 2.0935  |
| C    | -1.8010 | 1.6659  | -0.6944 |
| C    | -2.7148 | 0.6006  | -0.8585 |
| C    | -4.1053 | 0.8537  | -0.6985 |
| C    | -4.5487 | 2.1523  | -0.4105 |
| C    | -3.6467 | 3.2024  | -0.2748 |
| C    | -2.2699 | 2.9430  | -0.4119 |
| C    | -0.3101 | 1.4080  | -0.7501 |
| C    | 0.0638  | 0.1695  | -1.5326 |
| C    | -0.8601 | -0.9009 | -1.6511 |
| C    | -2.2441 | -0.7299 | -1.2429 |
| C    | 1.3232  | 0.0528  | -2.0935 |
| C    | 1.6961  | -1.1366 | -2.7431 |
| C    | 0.8367  | -2.2360 | -2.8438 |
| C    | -0.4505 | -2.1069 | -2.2946 |
| O    | 3.0634  | -1.6983 | 1.2998  |
| O    | -3.0634 | -1.6983 | -1.2997 |
| H    | 0.1647  | 2.2730  | -1.2242 |
| H    | -0.1647 | 2.2730  | 1.2241  |
| C    | 4.1315  | 4.6064  | 0.0050  |
| C    | -4.1314 | 4.6064  | -0.0051 |
| O    | 1.2836  | -3.1532 | 2.4143  |
| O    | 5.0324  | -0.1085 | 0.8182  |
| O    | -1.2836 | -3.1532 | -2.4143 |
| O    | -5.0323 | -0.1084 | -0.8181 |
| H    | 2.1441  | -2.8810 | 1.9941  |
| H    | 4.5429  | -0.9519 | 1.0028  |
| H    | -2.1441 | -2.8810 | -1.9941 |
| H    | -4.5429 | -0.9519 | -1.0027 |
| C    | -1.2683 | -3.5065 | 3.5350  |
| C    | 1.2682  | -3.5066 | -3.5350 |
| H    | 1.5618  | 3.7611  | 0.2958  |
| H    | 5.6173  | 2.3106  | 0.3005  |
| H    | -2.0466 | 0.8580  | 2.0409  |
| H    | -5.6172 | 2.3107  | -0.3005 |
| H    | -1.5617 | 3.7611  | -0.2958 |
| H    | 2.0466  | 0.8580  | -2.0410 |
| H    | 4.0775  | 5.2196  | 0.9141  |
| H    | 3.5165  | 5.1022  | -0.7545 |
| H    | 5.1703  | 4.6136  | -0.3379 |
| H    | -4.0772 | 5.2197  | -0.9141 |
| H    | -5.1703 | 4.6137  | 0.3377  |
| H    | -3.5165 | 5.1022  | 0.7546  |
| H    | -1.5088 | -3.3369 | 4.5946  |
| H    | -2.1519 | -3.9538 | 3.0573  |
| H    | -0.4687 | -4.2471 | 3.4980  |
| H    | 2.1521  | -3.9536 | -3.0576 |
| H    | 1.5083  | -3.3371 | -4.5946 |
| H    | 0.4688  | -4.2474 | -3.4975 |
| O    | 2.9489  | -1.1608 | -3.2691 |
| H    | 3.1111  | -2.0259 | -3.6772 |
| O    | -2.9490 | -1.1608 | 3.2690  |
| H    | -3.1112 | -2.0259 | 3.6771  |

Cartesian coordinates of **12-I** optimized at the gas-phase B3LYP/6-31G(d) level

| atom | X       | Y       | Z       |
|------|---------|---------|---------|
| C    | -1.6609 | 1.1745  | -0.9352 |
| C    | -0.5521 | 0.3481  | -1.2057 |
| C    | 0.6349  | 0.9322  | -1.6261 |
| C    | 0.7974  | 2.3228  | -1.7447 |
| C    | -0.2854 | 3.1788  | -1.4244 |
| C    | -1.5092 | 2.5839  | -1.0338 |
| C    | -2.9789 | 0.5885  | -0.6883 |
| C    | -3.1656 | -0.8390 | -0.8701 |
| C    | -2.0558 | -1.6889 | -1.1028 |
| C    | -0.6453 | -1.1464 | -1.0052 |
| C    | -4.4783 | -1.4010 | -0.8724 |
| C    | -4.6568 | -2.7638 | -1.1277 |
| C    | -3.5493 | -3.5700 | -1.3756 |
| C    | -2.2473 | -3.0366 | -1.3574 |
| C    | 1.5466  | -1.5630 | 0.2633  |
| C    | 2.2756  | -0.5294 | 0.8739  |
| C    | 3.6771  | -0.4505 | 0.6514  |
| C    | 4.3622  | -1.3995 | -0.1463 |
| C    | 3.6062  | -2.4520 | -0.7250 |
| C    | 2.2210  | -2.5000 | -0.5090 |
| C    | 0.0406  | -1.6295 | 0.3841  |
| C    | -0.5068 | -0.8999 | 1.5906  |
| C    | 0.2342  | 0.1692  | 2.1648  |
| C    | 1.6055  | 0.4180  | 1.7700  |
| C    | -1.7447 | -1.2440 | 2.1036  |
| C    | -2.2918 | -0.5072 | 3.1728  |
| C    | -1.6103 | 0.5717  | 3.7251  |
| C    | -0.3467 | 0.9156  | 3.2346  |
| O    | -3.9679 | 1.3336  | -0.4024 |
| O    | 2.2523  | 1.3974  | 2.2560  |
| H    | -0.2429 | -2.6842 | 0.4576  |
| H    | -0.0428 | -1.6359 | -1.7768 |
| C    | 2.1442  | 2.8145  | -2.2148 |
| C    | 4.2029  | -3.5469 | -1.5756 |
| O    | -5.5738 | -0.6679 | -0.6433 |
| O    | -2.5641 | 3.3803  | -0.7558 |
| O    | 0.2792  | 1.9431  | 3.8181  |
| O    | 4.3741  | 0.5578  | 1.2174  |
| H    | -5.2713 | 0.2606  | -0.4710 |
| H    | -3.3435 | 2.7845  | -0.5343 |
| H    | 1.1588  | 2.0432  | 3.3717  |
| H    | 3.7230  | 1.1277  | 1.7323  |
| H    | 1.4766  | 0.2957  | -1.8774 |
| H    | -5.6671 | -3.1629 | -1.1302 |
| H    | -1.4123 | -3.7028 | -1.5505 |
| H    | 1.6590  | -3.3115 | -0.9646 |
| H    | -2.3161 | -2.0721 | 1.7015  |
| H    | -2.0234 | 1.1523  | 4.5451  |
| H    | 2.7742  | 1.9643  | -2.4929 |
| H    | 2.0528  | 3.4908  | -3.0683 |
| H    | 2.6473  | 3.3935  | -1.4356 |
| H    | 3.4211  | -4.2524 | -1.8737 |
| H    | 4.9896  | -4.0863 | -1.0421 |
| H    | 4.6828  | -3.1422 | -2.4703 |
| C    | -0.1060 | 4.6805  | -1.5126 |
| C    | 5.8552  | -1.3249 | -0.3948 |
| O    | 0.9806  | 5.1919  | -1.6857 |
| O    | 6.4303  | -2.1167 | -1.1128 |
| O    | -1.1948 | 5.4622  | -1.4092 |
| H    | -1.9890 | 4.9243  | -1.2131 |
| O    | 6.5573  | -0.3492 | 0.2046  |
| H    | 5.9703  | 0.2260  | 0.7374  |
| O    | -3.6576 | -4.8952 | -1.6409 |
| H    | -4.5938 | -5.1519 | -1.6370 |
| O    | -3.5076 | -0.9073 | 3.6189  |
| H    | -3.7903 | -0.3343 | 4.3499  |



Cartesian coordinates of **12-II** optimized at the gas-phase B3LYP/6-31G(d) level

| atom | X       | Y       | Z       |
|------|---------|---------|---------|
| C    | 0.6340  | 0.6530  | -2.2495 |
| C    | 0.3746  | -0.7149 | -2.0329 |
| C    | 1.0943  | -1.6580 | -2.7536 |
| C    | 2.1125  | -1.3093 | -3.6569 |
| C    | 2.4312  | 0.0577  | -3.8509 |
| C    | 1.6717  | 1.0230  | -3.1470 |
| C    | -0.2364 | 1.6738  | -1.6649 |
| C    | -1.4513 | 1.2649  | -0.9848 |
| C    | -1.7073 | -0.1042 | -0.7238 |
| C    | -0.6453 | -1.1464 | -1.0052 |
| C    | -2.4342 | 2.2336  | -0.6177 |
| C    | -3.6375 | 1.8249  | -0.0353 |
| C    | -3.8709 | 0.4709  | 0.1883  |
| C    | -2.9050 | -0.4953 | -0.1490 |
| C    | 0.6429  | -0.4411 | 1.0996  |
| C    | 0.0112  | 0.1246  | 2.2192  |
| C    | 0.5602  | 1.3003  | 2.7990  |
| C    | 1.7400  | 1.9013  | 2.2961  |
| C    | 2.3758  | 1.2906  | 1.1839  |
| C    | 1.8064  | 0.1421  | 0.6144  |
| C    | 0.0406  | -1.6295 | 0.3841  |
| C    | -0.8960 | -2.4482 | 1.2444  |
| C    | -1.5531 | -1.8396 | 2.3487  |
| C    | -1.1641 | -0.5228 | 2.8102  |
| C    | -1.1452 | -3.7719 | 0.9286  |
| C    | -2.0834 | -4.5087 | 1.6785  |
| C    | -2.7746 | -3.9270 | 2.7356  |
| C    | -2.5148 | -2.5977 | 3.0833  |
| O    | 0.0245  | 2.9071  | -1.8263 |
| O    | -1.7787 | 0.0345  | 3.7722  |
| H    | 0.8623  | -2.2734 | 0.0548  |
| H    | -1.1471 | -2.0464 | -1.3743 |
| C    | 2.8085  | -2.4419 | -4.3706 |
| C    | 3.6501  | 1.8032  | 0.5577  |
| O    | -2.2587 | 3.5452  | -0.8150 |
| O    | 1.9369  | 2.3330  | -3.3421 |
| O    | -3.1851 | -2.0936 | 4.1247  |
| O    | -0.0612 | 1.8589  | 3.8595  |
| H    | -1.3607 | 3.6606  | -1.2194 |
| H    | 1.2812  | 2.8602  | -2.7912 |
| H    | -2.8754 | -1.1600 | 4.2495  |
| H    | -0.8757 | 1.3032  | 4.0637  |
| H    | 0.8663  | -2.7103 | -2.6214 |
| H    | -4.3701 | 2.5828  | 0.2274  |
| H    | -3.1266 | -1.5395 | 0.0481  |
| H    | 2.3061  | -0.3082 | -0.2397 |
| H    | -0.6366 | -4.2661 | 0.1094  |
| H    | -3.5052 | -4.4815 | 3.3177  |
| H    | 2.3186  | -3.3901 | -4.1299 |
| H    | 2.8070  | -2.2993 | -5.4540 |
| H    | 3.8623  | -2.5004 | -4.0850 |
| H    | 3.9530  | 1.1423  | -0.2604 |
| H    | 4.4602  | 1.8650  | 1.2887  |
| H    | 3.5268  | 2.8188  | 0.1732  |
| C    | 3.5536  | 0.4398  | -4.7939 |
| C    | 2.3338  | 3.1569  | 2.9022  |
| O    | 4.3079  | -0.3843 | -5.2674 |
| O    | 3.3215  | 3.6911  | 2.4415  |
| O    | 3.7006  | 1.7352  | -5.1221 |
| H    | 3.0670  | 2.2917  | -4.6247 |
| O    | 1.7428  | 3.6877  | 3.9853  |
| H    | 0.9509  | 3.1703  | 4.2393  |
| O    | -5.0215 | 0.0110  | 0.7385  |
| H    | -5.6149 | 0.7571  | 0.9219  |
| O    | -2.2703 | -5.7988 | 1.3071  |
| H    | -2.9341 | -6.2102 | 1.8840  |

Cartesian coordinates of **12-III** optimized at the gas-phase B3LYP/6-31G(d) level

| atom | X       | Y       | Z       |
|------|---------|---------|---------|
| C    | 0.5340  | -0.5160 | -1.8173 |
| C    | -0.3430 | 0.5386  | -1.4955 |
| C    | -1.6901 | 0.4105  | -1.8045 |
| C    | -2.2300 | -0.7497 | -2.3839 |
| C    | -1.3786 | -1.8458 | -2.6688 |
| C    | 0.0021  | -1.7044 | -2.3871 |
| C    | 1.9817  | -0.3412 | -1.6908 |
| C    | 2.5118  | 0.9713  | -1.3695 |
| C    | 1.6455  | 2.0336  | -1.0106 |
| C    | 0.1691  | 1.7751  | -0.7935 |
| C    | 3.9135  | 1.2265  | -1.4679 |
| C    | 4.4095  | 2.5133  | -1.2373 |
| C    | 3.5312  | 3.5431  | -0.9117 |
| C    | 2.1497  | 3.3049  | -0.7917 |
| C    | 0.3428  | 0.5390  | 1.4953  |
| C    | -0.5340 | -0.5157 | 1.8175  |
| C    | -0.0017 | -1.7038 | 2.3876  |
| C    | 1.3790  | -1.8449 | 2.6690  |
| C    | 2.2303  | -0.7487 | 2.3836  |
| C    | 1.6900  | 0.4112  | 1.8040  |
| C    | -0.1696 | 1.7752  | 0.7930  |
| C    | -1.6461 | 2.0335  | 1.0102  |
| C    | -2.5121 | 0.9711  | 1.3695  |
| C    | -1.9817 | -0.3412 | 1.6911  |
| C    | -2.1505 | 3.3046  | 0.7910  |
| C    | -3.5321 | 3.5425  | 0.9111  |
| C    | -4.4101 | 2.5126  | 1.2371  |
| C    | -3.9138 | 1.2260  | 1.4679  |
| O    | 2.7679  | -1.3064 | -1.9420 |
| O    | -2.7677 | -1.3064 | 1.9426  |
| H    | 0.3825  | 2.6402  | 1.1739  |
| H    | -0.3832 | 2.6399  | -1.1746 |
| C    | -3.7125 | -0.7424 | -2.6668 |
| C    | 3.7128  | -0.7411 | 2.6662  |
| O    | 4.7974  | 0.2732  | -1.7824 |
| O    | 0.8361  | -2.7257 | -2.6777 |
| O    | -4.7974 | 0.2725  | 1.7828  |
| O    | -0.8355 | -2.7252 | 2.6786  |
| H    | 4.2882  | -0.5694 | -1.9023 |
| H    | 1.7691  | -2.4356 | -2.4400 |
| H    | -4.2880 | -0.5699 | 1.9029  |
| H    | -1.7686 | -2.4352 | 2.4412  |
| O    | 3.9486  | 4.8140  | -0.6903 |
| H    | 5.4793  | 2.6798  | -1.3258 |
| O    | -3.9499 | 4.8133  | 0.6894  |
| H    | -5.4800 | 2.6789  | 1.3257  |
| H    | 4.9108  | 4.8654  | -0.8097 |
| H    | -4.9120 | 4.8645  | 0.8089  |
| H    | -2.3603 | 1.2370  | -1.5940 |
| H    | 1.5022  | 4.1360  | -0.5301 |
| H    | 2.3600  | 1.2378  | 1.5932  |
| H    | -1.5032 | 4.1357  | 0.5291  |
| H    | -4.1292 | 0.2426  | -2.4351 |
| H    | -3.9262 | -0.9891 | -3.7097 |
| H    | -4.2328 | -1.4997 | -2.0744 |
| H    | 3.9268  | -0.9878 | 3.7090  |
| H    | 4.2331  | -1.4984 | 2.0737  |
| H    | 4.1292  | 0.2440  | 2.4345  |
| C    | 1.9608  | -3.1105 | 3.2650  |
| C    | -1.9599 | -3.1117 | -3.2647 |
| O    | -3.1561 | -3.2792 | -3.3823 |
| O    | 3.1571  | -3.2780 | 3.3819  |
| O    | 1.1166  | -4.0666 | 3.6876  |
| H    | 0.1892  | -3.8236 | 3.4880  |
| O    | -1.1154 | -4.0679 | -3.6862 |
| H    | -0.1882 | -3.8247 | -3.4864 |

Cartesian coordinates of **12-IV** optimized at the gas-phase B3LYP/6-31G(d) level

| atom | X       | Y       | Z       |
|------|---------|---------|---------|
| C    | 2.7385  | 0.0698  | 0.7566  |
| C    | 1.8228  | 1.1269  | 0.6258  |
| C    | 2.2962  | 2.3970  | 0.3228  |
| C    | 3.6571  | 2.6728  | 0.1222  |
| C    | 4.6002  | 1.6166  | 0.2183  |
| C    | 4.1194  | 0.3236  | 0.5380  |
| C    | 2.2781  | -1.2602 | 1.1660  |
| C    | 0.9134  | -1.4265 | 1.6203  |
| C    | -0.0169 | -0.3543 | 1.5375  |
| C    | 0.3353  | 0.8811  | 0.7399  |
| C    | 0.5229  | -2.6298 | 2.2828  |
| C    | -0.7426 | -2.7299 | 2.8686  |
| C    | -1.6139 | -1.6475 | 2.8111  |
| C    | -1.2556 | -0.4588 | 2.1439  |
| C    | -1.8228 | 1.1269  | -0.6258 |
| C    | -2.7386 | 0.0698  | -0.7566 |
| C    | -4.1194 | 0.3237  | -0.5380 |
| C    | -4.6002 | 1.6166  | -0.2183 |
| C    | -3.6571 | 2.6728  | -0.1221 |
| C    | -2.2961 | 2.3970  | -0.3228 |
| C    | -0.3353 | 0.8811  | -0.7399 |
| C    | 0.0169  | -0.3543 | -1.5375 |
| C    | -0.9134 | -1.4265 | -1.6204 |
| C    | -2.2782 | -1.2602 | -1.1661 |
| C    | 1.2556  | -0.4588 | -2.1439 |
| C    | 1.6139  | -1.6475 | -2.8111 |
| C    | 0.7426  | -2.7299 | -2.8686 |
| C    | -0.5229 | -2.6298 | -2.2828 |
| O    | 3.0961  | -2.2328 | 1.1998  |
| O    | -3.0961 | -2.2328 | -1.1997 |
| H    | 0.1137  | 1.7517  | -1.2284 |
| H    | -0.1137 | 1.7516  | 1.2284  |
| C    | 4.0270  | 4.1029  | -0.1871 |
| C    | -4.0270 | 4.1030  | 0.1872  |
| O    | 1.3349  | -3.6878 | 2.3883  |
| O    | 4.9967  | -0.6978 | 0.6393  |
| O    | -1.3349 | -3.6878 | -2.3884 |
| O    | -4.9968 | -0.6977 | -0.6394 |
| H    | 2.1879  | -3.4462 | 1.9445  |
| H    | 4.4714  | -1.5282 | 0.8586  |
| H    | -2.1879 | -3.4461 | -1.9446 |
| H    | -4.4716 | -1.5281 | -0.8588 |
| O    | -2.8439 | -1.6697 | 3.3783  |
| H    | -1.0091 | -3.6542 | 3.3733  |
| O    | 2.8439  | -1.6696 | -3.3783 |
| H    | 1.0091  | -3.6542 | -3.3732 |
| H    | -2.9887 | -2.5264 | 3.8116  |
| H    | 2.9888  | -2.5264 | -3.8115 |
| H    | 1.5887  | 3.2183  | 0.2401  |
| H    | -1.9706 | 0.3552  | 2.1215  |
| H    | -1.5886 | 3.2183  | -0.2400 |
| H    | 1.9706  | 0.3552  | -2.1214 |
| H    | 3.1318  | 4.7320  | -0.1602 |
| H    | 4.7607  | 4.4912  | 0.5238  |
| H    | 4.4986  | 4.1897  | -1.1693 |
| H    | -4.7606 | 4.4913  | -0.5237 |
| H    | -4.4986 | 4.1897  | 1.1694  |
| H    | -3.1317 | 4.7320  | 0.1604  |
| C    | -6.0691 | 1.8988  | 0.0236  |
| C    | 6.0691  | 1.8988  | -0.0236 |
| O    | 6.4687  | 2.9905  | -0.3724 |
| O    | -6.4689 | 2.9905  | 0.3722  |
| O    | -6.9520 | 0.9033  | -0.1632 |
| H    | -6.4934 | 0.0743  | -0.4113 |
| O    | 6.9521  | 0.9034  | 0.1633  |
| H    | 6.4937  | 0.0744  | 0.4115  |

Cartesian coordinates of **13-I** optimized at the gas-phase B3LYP/6-31G(d) level

| atom | X       | Y       | Z       |
|------|---------|---------|---------|
| C    | 0.7053  | -1.6325 | -1.3372 |
| C    | -0.0721 | -0.4622 | -1.4807 |
| C    | -1.3295 | -0.5177 | -2.0788 |
| C    | -1.8840 | -1.7354 | -2.4848 |
| C    | -1.1336 | -2.9012 | -2.3305 |
| C    | 0.1538  | -2.8685 | -1.7774 |
| C    | 2.0890  | -1.5213 | -0.8254 |
| C    | 2.6974  | -0.1800 | -0.7879 |
| C    | 1.9162  | 0.9872  | -0.9376 |
| C    | 0.4118  | 0.8600  | -0.9311 |
| C    | 4.1100  | -0.0669 | -0.6635 |
| C    | 4.7177  | 1.1880  | -0.7642 |
| C    | 3.9486  | 2.3290  | -0.9591 |
| C    | 2.5445  | 2.2264  | -1.0348 |
| C    | -1.6470 | 1.5894  | 0.4219  |
| C    | -2.6738 | 0.6390  | 0.5787  |
| C    | -4.0199 | 1.0566  | 0.3739  |
| C    | -4.2932 | 2.3864  | 0.0368  |
| C    | -3.2644 | 3.3240  | -0.1084 |
| C    | -1.9449 | 2.9097  | 0.0782  |
| C    | -0.1918 | 1.1879  | 0.5510  |
| C    | 0.0062  | 0.0631  | 1.5389  |
| C    | -0.9948 | -0.9379 | 1.6076  |
| C    | -2.3175 | -0.7395 | 0.9933  |
| C    | 1.1411  | -0.0499 | 2.3384  |
| C    | 1.3365  | -1.1954 | 3.1448  |
| C    | 0.3987  | -2.2201 | 3.1430  |
| C    | -0.7706 | -2.1056 | 2.3855  |
| O    | 2.7682  | -2.5210 | -0.5201 |
| O    | -3.1282 | -1.6840 | 0.9220  |
| H    | 0.3702  | 2.0630  | 0.8814  |
| H    | -0.0023 | 1.6586  | -1.5505 |
| C    | -3.2932 | -1.7889 | -3.0193 |
| C    | -3.5880 | 4.7631  | -0.4307 |
| O    | 4.8993  | -1.1289 | -0.4700 |
| O    | 0.9157  | -3.9777 | -1.6520 |
| O    | -1.6539 | -3.1098 | 2.4423  |
| O    | -4.9943 | 0.1283  | 0.5261  |
| H    | 4.2821  | -1.9133 | -0.3950 |
| H    | -2.4048 | -2.8450 | 1.8380  |
| H    | -1.9013 | 0.3962  | -2.2059 |
| H    | -1.5633 | -3.8439 | -2.6473 |
| H    | 5.7997  | 1.2495  | -0.6829 |
| H    | -5.3174 | 2.7079  | -0.1133 |
| H    | -1.1338 | 3.6228  | -0.0399 |
| H    | 0.5473  | -3.1165 | 3.7388  |
| H    | -3.4821 | -2.7093 | -3.5807 |
| H    | -4.0062 | -1.7505 | -2.1850 |
| H    | -3.5064 | -0.9363 | -3.6735 |
| H    | -4.4157 | 4.8383  | -1.1447 |
| H    | -2.7228 | 5.2822  | -0.8538 |
| H    | -3.8893 | 5.3086  | 0.4733  |
| C    | -6.3521 | 0.5253  | 0.4067  |
| H    | -6.9362 | -0.3752 | 0.6032  |
| H    | -6.6143 | 1.2978  | 1.1411  |
| H    | -6.5800 | 0.8924  | -0.6025 |
| C    | 0.4067  | -5.2246 | -2.1015 |
| H    | 0.1837  | -5.2080 | -3.1762 |
| H    | 1.2003  | -5.9478 | -1.9071 |
| H    | -0.4942 | -5.5160 | -1.5469 |
| O    | 4.5012  | 3.5624  | -1.0726 |
| H    | 5.4652  | 3.4788  | -0.9988 |
| O    | 2.4606  | -1.2481 | 3.8985  |
| H    | 2.4748  | -2.0908 | 4.3795  |
| Cl   | 1.6321  | 3.7172  | -1.2450 |
| Cl   | 2.3456  | 1.2216  | 2.4438  |

Cartesian coordinates of **13-II** optimized at the gas-phase B3LYP/6-31G(d) level

| atom | X       | Y       | Z       |
|------|---------|---------|---------|
| C    | 2.6738  | 0.6389  | 0.5787  |
| C    | 1.6469  | 1.5893  | 0.4222  |
| C    | 1.9449  | 2.9097  | 0.0788  |
| C    | 3.2643  | 3.3240  | -0.1080 |
| C    | 4.2931  | 2.3864  | 0.0368  |
| C    | 4.0198  | 1.0565  | 0.3736  |
| C    | 2.3176  | -0.7396 | 0.9935  |
| C    | 0.9949  | -0.9381 | 1.6078  |
| C    | -0.0062 | 0.0629  | 1.5390  |
| C    | 0.1918  | 1.1877  | 0.5513  |
| C    | 0.7708  | -2.1058 | 2.3857  |
| C    | -0.3985 | -2.2204 | 3.1432  |
| C    | -1.3365 | -1.1958 | 3.1449  |
| C    | -1.1412 | -0.0503 | 2.3384  |
| C    | 0.0721  | -0.4621 | -1.4806 |
| C    | -0.7055 | -1.6325 | -1.3374 |
| C    | -0.1540 | -2.8684 | -1.7775 |
| C    | 1.1335  | -2.9012 | -2.3306 |
| C    | 1.8840  | -1.7355 | -2.4848 |
| C    | 1.3296  | -0.5177 | -2.0787 |
| C    | -0.4117 | 0.8600  | -0.9310 |
| C    | -1.9161 | 0.9874  | -0.9376 |
| C    | -2.6975 | -0.1797 | -0.7880 |
| C    | -2.0892 | -1.5211 | -0.8258 |
| C    | -2.5443 | 2.2266  | -1.0346 |
| C    | -3.9484 | 2.3294  | -0.9590 |
| C    | -4.7176 | 1.1885  | -0.7642 |
| C    | -4.1101 | -0.0666 | -0.6636 |
| O    | 3.1284  | -1.6840 | 0.9225  |
| O    | -2.7686 | -2.5208 | -0.5208 |
| H    | 0.0025  | 1.6587  | -1.5501 |
| H    | -0.3703 | 2.0628  | 0.8817  |
| C    | 3.5881  | 4.7629  | -0.4309 |
| C    | 3.2932  | -1.7889 | -3.0192 |
| O    | 1.6542  | -3.1099 | 2.4426  |
| O    | 4.9944  | 0.1281  | 0.5251  |
| O    | -4.8994 | -1.1284 | -0.4701 |
| O    | -0.9158 | -3.9776 | -1.6522 |
| H    | 2.4051  | -2.8449 | 1.8382  |
| H    | -4.2823 | -1.9128 | -0.3950 |
| H    | 1.1337  | 3.6229  | -0.0388 |
| H    | 5.3173  | 2.7079  | -0.1134 |
| H    | -0.5471 | -3.1168 | 3.7390  |
| H    | 1.5632  | -3.8440 | -2.6473 |
| H    | 1.9015  | 0.3961  | -2.2057 |
| H    | -5.7995 | 1.2501  | -0.6829 |
| H    | 3.9057  | 5.3046  | 0.4699  |
| H    | 4.4049  | 4.8372  | -1.1575 |
| H    | 2.7184  | 5.2864  | -0.8392 |
| H    | 3.4823  | -2.7097 | -3.5799 |
| H    | 4.0061  | -1.7498 | -2.1849 |
| H    | 3.5061  | -0.9367 | -3.6740 |
| C    | -0.4071 | -5.2244 | -2.1025 |
| H    | -1.2008 | -5.9475 | -1.9086 |
| H    | -0.1840 | -5.2070 | -3.1772 |
| H    | 0.4938  | -5.5163 | -1.5480 |
| C    | 6.3521  | 0.5257  | 0.4066  |
| H    | 6.6136  | 1.2980  | 1.1413  |
| H    | 6.9363  | -0.3747 | 0.6031  |
| H    | 6.5804  | 0.8931  | -0.6024 |
| O    | -2.4606 | -1.2486 | 3.8985  |
| H    | -2.4748 | -2.0914 | 4.3794  |
| O    | -4.5009 | 3.5629  | -1.0724 |
| H    | -5.4648 | 3.4793  | -0.9988 |
| Cl   | -2.3459 | 1.2210  | 2.4438  |
| Cl   | -1.6318 | 3.7175  | -1.2447 |

Cartesian coordinates of **13-III** optimized at the gas-phase B3LYP/6-31G(d) level

| atom | X       | Y       | Z       |
|------|---------|---------|---------|
| C    | -4.5622 | 1.1514  | 0.8246  |
| C    | -3.8845 | 2.3625  | 0.7553  |
| C    | -2.4726 | 2.3849  | 0.7628  |
| C    | -1.7444 | 1.2019  | 0.8786  |
| C    | -2.4335 | -0.0261 | 1.0094  |
| C    | -3.8529 | -0.0481 | 0.9367  |
| C    | -0.2346 | 1.1695  | 0.7825  |
| C    | 0.3719  | 0.0350  | 1.5784  |
| C    | -0.3111 | -1.1916 | 1.7225  |
| C    | -1.7145 | -1.2882 | 1.2678  |
| C    | 1.6416  | 0.2046  | 2.1287  |
| C    | 2.2866  | -0.8408 | 2.7941  |
| C    | 1.6307  | -2.0675 | 2.9195  |
| C    | 0.3458  | -2.2595 | 2.3979  |
| C    | 0.2345  | 1.1694  | -0.7827 |
| C    | 1.7442  | 1.2020  | -0.8787 |
| C    | 2.4334  | -0.0260 | -1.0094 |
| C    | 1.7146  | -1.2882 | -1.2676 |
| C    | 0.3112  | -1.1918 | -1.7224 |
| C    | -0.3719 | 0.0348  | -1.5784 |
| C    | -0.3456 | -2.2598 | -2.3977 |
| C    | -1.6305 | -2.0679 | -2.9194 |
| C    | -2.2866 | -0.8412 | -2.7941 |
| C    | -1.6417 | 0.2043  | -2.1288 |
| C    | 2.4724  | 2.3849  | -0.7630 |
| C    | 3.8843  | 2.3626  | -0.7554 |
| C    | 4.5621  | 1.1515  | -0.8247 |
| C    | 3.8528  | -0.0480 | -0.9367 |
| O    | -2.3202 | -2.3751 | 1.1948  |
| O    | 2.3205  | -2.3750 | -1.1945 |
| C    | 3.6880  | -0.6639 | 3.3259  |
| C    | -3.6879 | -0.6645 | -3.3260 |
| O    | -4.5558 | -1.1870 | 0.9751  |
| O    | -0.3236 | -3.4265 | 2.5264  |
| O    | 4.5556  | -1.1870 | -0.9752 |
| O    | 0.3239  | -3.4267 | -2.5261 |
| H    | -3.8749 | -1.9200 | 1.0311  |
| C    | 0.3001  | -4.5130 | 3.1945  |
| H    | 3.8746  | -1.9199 | -1.0314 |
| C    | -0.2998 | -4.5133 | -3.1942 |
| H    | 0.1647  | 2.1110  | 1.1666  |
| H    | -0.1649 | 2.1109  | -1.1668 |
| H    | 2.1334  | -2.8775 | 3.4343  |
| H    | -2.1332 | -2.8780 | -3.4341 |
| H    | -1.2211 | -4.8228 | -2.6850 |
| H    | 1.2215  | -4.8225 | 2.6853  |
| H    | -5.6479 | 1.1133  | 0.7936  |
| H    | 2.1462  | 1.1605  | 2.0206  |
| H    | -2.1463 | 1.1601  | -2.0208 |
| H    | 5.6478  | 1.1134  | -0.7936 |
| H    | 3.8565  | 0.3601  | 3.6752  |
| H    | 4.4247  | -0.8653 | 2.5368  |
| H    | 3.8965  | -1.3486 | 4.1543  |
| H    | -4.4246 | -0.8655 | -2.5368 |
| H    | -3.8965 | -1.3495 | -4.1541 |
| H    | -3.8564 | 0.3594  | -3.6757 |
| H    | 0.5253  | -4.2707 | 4.2413  |
| H    | -0.4242 | -5.3282 | 3.1600  |
| H    | -0.5249 | -4.2711 | -4.2410 |
| H    | 0.4246  | -5.3285 | -3.1595 |
| O    | -4.5340 | 3.5493  | 0.6633  |
| H    | -5.4900 | 3.3844  | 0.6894  |
| O    | 4.5339  | 3.5494  | -0.6635 |
| H    | 5.4898  | 3.3845  | -0.6895 |
| Cl   | -1.6903 | 3.9506  | 0.6363  |
| Cl   | 1.6901  | 3.9506  | -0.6365 |

Cartesian coordinates of **13-IV** optimized at the gas-phase B3LYP/6-31G(d) level

| atom | X       | Y       | Z       |
|------|---------|---------|---------|
| C    | -0.9004 | -2.5770 | 2.7504  |
| C    | -1.7060 | -1.4534 | 2.8808  |
| C    | -1.3237 | -0.2309 | 2.2815  |
| C    | -0.1379 | -0.1434 | 1.5553  |
| C    | 0.7286  | -1.2619 | 1.5028  |
| C    | 0.3197  | -2.4974 | 2.0709  |
| C    | 0.2619  | 1.0847  | 0.7724  |
| C    | 1.7564  | 1.3196  | 0.8145  |
| C    | 2.6492  | 0.2328  | 0.8457  |
| C    | 2.1033  | -1.1382 | 0.9851  |
| C    | 2.2295  | 2.6314  | 0.7754  |
| C    | 3.5979  | 2.9014  | 0.7536  |
| C    | 4.4964  | 1.8293  | 0.7715  |
| C    | 4.0462  | 0.5052  | 0.8143  |
| C    | -0.2619 | 1.0848  | -0.7723 |
| C    | 0.1379  | -0.1433 | -1.5553 |
| C    | -0.7286 | -1.2618 | -1.5029 |
| C    | -2.1033 | -1.1382 | -0.9853 |
| C    | -2.6493 | 0.2328  | -0.8457 |
| C    | -1.7564 | 1.3196  | -0.8144 |
| C    | -4.0462 | 0.5052  | -0.8143 |
| C    | -4.4964 | 1.8294  | -0.7714 |
| C    | -3.5980 | 2.9015  | -0.7534 |
| C    | -2.2295 | 2.6315  | -0.7751 |
| C    | 1.3237  | -0.2306 | -2.2816 |
| C    | 1.7060  | -1.4530 | -2.8810 |
| C    | 0.9005  | -2.5768 | -2.7506 |
| C    | -0.3196 | -2.4972 | -2.0711 |
| O    | 2.7927  | -2.1564 | 0.7862  |
| O    | -2.7927 | -2.1563 | -0.7864 |
| C    | 4.1110  | 4.3201  | 0.6932  |
| C    | -4.1111 | 4.3202  | -0.6928 |
| O    | 1.0712  | -3.6020 | 2.0013  |
| O    | 4.8895  | -0.5509 | 0.8563  |
| O    | -1.0709 | -3.6019 | -2.0015 |
| O    | -4.8895 | -0.5508 | -0.8564 |
| H    | 1.8803  | -3.3472 | 1.4723  |
| C    | 6.2897  | -0.3192 | 0.8464  |
| H    | -1.8799 | -3.3474 | -1.4722 |
| C    | -6.2897 | -0.3191 | -0.8465 |
| H    | -0.2299 | 1.9590  | 1.2045  |
| H    | 0.2298  | 1.9591  | -1.2043 |
| H    | 5.5595  | 2.0392  | 0.7585  |
| H    | -5.5596 | 2.0392  | -0.7584 |
| H    | -6.6068 | 0.1934  | 0.0707  |
| H    | 6.6067  | 0.1935  | -0.0707 |
| H    | -1.1926 | -3.5292 | 3.1849  |
| H    | 1.5191  | 3.4549  | 0.7619  |
| H    | -1.5192 | 3.4549  | -0.7616 |
| H    | 1.1928  | -3.5288 | -3.1851 |
| H    | 3.3325  | 5.0389  | 0.9665  |
| H    | 4.4519  | 4.5709  | -0.3199 |
| H    | 4.9629  | 4.4681  | 1.3665  |
| H    | -4.4517 | 4.5709  | 0.3204  |
| H    | -4.9631 | 4.4682  | -1.3658 |
| H    | -3.3326 | 5.0390  | -0.9662 |
| H    | 6.6105  | 0.2644  | 1.7193  |
| H    | 6.7479  | -1.3086 | 0.8844  |
| H    | -6.6105 | 0.2645  | -1.7193 |
| H    | -6.7479 | -1.3086 | -0.8846 |
| O    | -2.8725 | -1.4782 | 3.5701  |
| H    | -3.0193 | -2.3794 | 3.8989  |
| O    | 2.8725  | -1.4778 | -3.5703 |
| H    | 3.0193  | -2.3789 | -3.8992 |
| Cl   | -2.3672 | 1.1556  | 2.5502  |
| Cl   | 2.3671  | 1.1559  | -2.5501 |

Cartesian coordinates of **14-I** optimized at the gas-phase B3LYP/6-31G(d) level

| atom | X       | Y       | Z       |
|------|---------|---------|---------|
| C    | -1.2350 | -0.7417 | 1.6085  |
| C    | -0.1464 | 0.1614  | 1.4977  |
| C    | 1.0598  | -0.1373 | 2.1138  |
| C    | 1.2493  | -1.3536 | 2.8025  |
| C    | 0.1998  | -2.2599 | 2.8805  |
| C    | -1.0441 | -1.9703 | 2.3007  |
| C    | -2.5599 | -0.3721 | 1.1297  |
| C    | -2.7959 | 0.9975  | 0.6671  |
| C    | -1.7136 | 1.8925  | 0.5060  |
| C    | -0.2866 | 1.4106  | 0.6574  |
| C    | -4.1248 | 1.4525  | 0.4302  |
| C    | -4.3472 | 2.7894  | 0.0675  |
| C    | -3.2726 | 3.6561  | -0.0648 |
| C    | -1.9601 | 3.2147  | 0.1471  |
| C    | 1.9131  | 1.2966  | -0.6638 |
| C    | 2.6645  | 0.1008  | -0.7016 |
| C    | 4.0601  | 0.1540  | -0.4348 |
| C    | 4.6746  | 1.3875  | -0.1791 |
| C    | 3.9361  | 2.5670  | -0.1774 |
| C    | 2.5494  | 2.5060  | -0.4112 |
| C    | 0.4065  | 1.2543  | -0.8041 |
| C    | -0.1018 | 0.0439  | -1.5553 |
| C    | 0.6632  | -1.1526 | -1.5597 |
| C    | 2.0262  | -1.1661 | -1.0585 |
| C    | -1.3319 | 0.0873  | -2.1900 |
| C    | -1.8426 | -1.0696 | -2.8089 |
| C    | -1.1350 | -2.2670 | -2.7907 |
| C    | 0.1183  | -2.3192 | -2.1726 |
| O    | -3.5192 | -1.1968 | 1.1887  |
| O    | 2.6889  | -2.2469 | -1.0094 |
| H    | 0.0896  | 2.1545  | -1.3401 |
| H    | 0.2903  | 2.2130  | 1.1288  |
| C    | 2.5928  | -1.6617 | 3.4160  |
| C    | 4.6101  | 3.8982  | 0.0518  |
| O    | -5.1933 | 0.6513  | 0.5461  |
| O    | -2.0203 | -2.8788 | 2.4400  |
| O    | 0.7742  | -3.4862 | -2.1996 |
| O    | 4.8306  | -0.9455 | -0.4113 |
| H    | -4.8513 | -0.2478 | 0.7898  |
| H    | -2.8212 | -2.5113 | 1.9850  |
| H    | 1.6380  | -3.3390 | -1.7309 |
| H    | 4.2357  | -1.7132 | -0.6188 |
| H    | -5.3691 | 3.1132  | -0.0999 |
| O    | -3.0526 | -0.9485 | -3.4125 |
| H    | -1.5225 | -3.1686 | -3.2571 |
| H    | -3.3109 | -1.8048 | -3.7896 |
| H    | 1.8830  | 0.5677  | 2.0532  |
| H    | 0.3104  | -3.2075 | 3.3985  |
| H    | -1.1311 | 3.9087  | 0.0341  |
| H    | 5.7434  | 1.3928  | 0.0121  |
| H    | 1.9672  | 3.4252  | -0.3920 |
| H    | -1.9244 | 0.9942  | -2.2186 |
| H    | 2.9150  | -0.8565 | 4.0872  |
| H    | 3.3603  | -1.7563 | 2.6372  |
| H    | 2.5724  | -2.5946 | 3.9863  |
| H    | 4.7514  | 4.4319  | -0.8973 |
| H    | 5.5954  | 3.7758  | 0.5112  |
| H    | 4.0076  | 4.5457  | 0.6986  |
| H    | -3.4524 | 4.6929  | -0.3366 |



Cartesian coordinates of **14-II** optimized at the gas-phase B3LYP/6-31G(d) level

| atom | X       | Y       | Z       |
|------|---------|---------|---------|
| C    | 2.6743  | 0.4941  | 0.6179  |
| C    | 1.7149  | 1.5241  | 0.4886  |
| C    | 2.1075  | 2.7837  | 0.0536  |
| C    | 3.4482  | 3.0569  | -0.2785 |
| C    | 4.3894  | 2.0358  | -0.1888 |
| C    | 4.0231  | 0.7564  | 0.2507  |
| C    | 2.2966  | -0.8066 | 1.1656  |
| C    | 0.9751  | -0.9669 | 1.7672  |
| C    | 0.0068  | 0.0637  | 1.6587  |
| C    | 0.2502  | 1.2327  | 0.7311  |
| C    | 0.6934  | -2.1150 | 2.5611  |
| C    | -0.5211 | -2.1962 | 3.2592  |
| C    | -1.4356 | -1.1592 | 3.1709  |
| C    | -1.1816 | -0.0330 | 2.3741  |
| C    | -0.1850 | -0.2338 | -1.3829 |
| C    | -1.0919 | -1.3225 | -1.3221 |
| C    | -0.7072 | -2.5725 | -1.8812 |
| C    | 0.5456  | -2.7064 | -2.4983 |
| C    | 1.4142  | -1.6265 | -2.5874 |
| C    | 1.0313  | -0.3878 | -2.0324 |
| C    | -0.5196 | 1.0692  | -0.6912 |
| C    | -2.0039 | 1.3017  | -0.5018 |
| C    | -2.9020 | 0.2086  | -0.4855 |
| C    | -2.4434 | -1.1367 | -0.8075 |
| C    | -2.4660 | 2.5910  | -0.2798 |
| C    | -3.8297 | 2.8132  | -0.0255 |
| C    | -4.7316 | 1.7535  | 0.0214  |
| C    | -4.2795 | 0.4497  | -0.2058 |
| O    | 3.1384  | -1.7517 | 1.1978  |
| O    | -3.2393 | -2.1204 | -0.7189 |
| H    | -0.1249 | 1.8941  | -1.2931 |
| H    | -0.2045 | 2.1259  | 1.1714  |
| C    | 3.8551  | 4.4452  | -0.7090 |
| C    | 2.7669  | -1.7658 | -3.2412 |
| O    | 1.5555  | -3.1336 | 2.6912  |
| O    | 4.9791  | -0.1846 | 0.3029  |
| O    | -5.1815 | -0.5387 | -0.1533 |
| O    | -1.5053 | -3.6497 | -1.8575 |
| H    | 2.3494  | -2.9116 | 2.1408  |
| H    | 4.5453  | -1.0126 | 0.6371  |
| H    | -4.6859 | -1.3830 | -0.3316 |
| H    | -2.3413 | -3.3766 | -1.3987 |
| H    | -0.7083 | -3.0770 | 3.8643  |
| O    | -4.2120 | 4.1027  | 0.1732  |
| H    | -5.7877 | 1.9094  | 0.2242  |
| H    | -5.1702 | 4.1325  | 0.3246  |
| H    | 1.3669  | 3.5760  | -0.0343 |
| H    | 5.4292  | 2.2047  | -0.4518 |
| H    | -1.9167 | 0.7626  | 2.3139  |
| H    | 0.8075  | -3.6761 | -2.9103 |
| H    | 1.7113  | 0.4552  | -2.1058 |
| H    | -1.7958 | 3.4448  | -0.3010 |
| H    | 3.8985  | 5.1232  | 0.1534  |
| H    | 4.8419  | 4.4468  | -1.1811 |
| H    | 3.1350  | 4.8712  | -1.4168 |
| H    | 3.5686  | -1.6298 | -2.5041 |
| H    | 2.8939  | -2.7500 | -3.7009 |
| H    | 2.9122  | -1.0042 | -4.0169 |
| H    | -2.3683 | -1.2207 | 3.7253  |

Cartesian coordinates of **14-III** optimized at the gas-phase B3LYP/6-31G(d) level

| atom | X       | Y       | Z       |
|------|---------|---------|---------|
| C    | 0.6697  | -1.1326 | -1.5689 |
| C    | -0.1065 | 0.0542  | -1.5312 |
| C    | -1.3581 | 0.0770  | -2.1291 |
| C    | -1.9023 | -1.0760 | -2.7327 |
| C    | -1.1625 | -2.2513 | -2.7390 |
| C    | 0.1198  | -2.2975 | -2.1715 |
| C    | 2.0506  | -1.1331 | -1.1020 |
| C    | 2.6772  | 0.1315  | -0.7383 |
| C    | 1.9143  | 1.3206  | -0.6658 |
| C    | 0.4061  | 1.2666  | -0.7863 |
| C    | 4.0815  | 0.1960  | -0.5015 |
| C    | 4.6933  | 1.4255  | -0.2378 |
| C    | 3.9223  | 2.5847  | -0.2029 |
| C    | 2.5331  | 2.5351  | -0.4073 |
| C    | -0.1186 | 0.1636  | 1.5162  |
| C    | -1.2007 | -0.7486 | 1.6168  |
| C    | -1.0034 | -1.9803 | 2.3015  |
| C    | 0.2392  | -2.2618 | 2.8881  |
| C    | 1.2825  | -1.3478 | 2.8184  |
| C    | 1.0886  | -0.1308 | 2.1319  |
| C    | -0.2678 | 1.4178  | 0.6854  |
| C    | -1.6972 | 1.8942  | 0.5463  |
| C    | -2.7710 | 0.9855  | 0.6828  |
| C    | -2.5244 | -0.3881 | 1.1293  |
| C    | -1.9541 | 3.2197  | 0.2071  |
| C    | -3.2689 | 3.6493  | -0.0135 |
| C    | -4.3348 | 2.7668  | 0.0864  |
| C    | -4.1009 | 1.4270  | 0.4294  |
| O    | 2.7266  | -2.2067 | -1.0892 |
| O    | -3.4759 | -1.2230 | 1.1676  |
| H    | 0.3114  | 2.2192  | 1.1554  |
| H    | 0.0781  | 2.1667  | -1.3160 |
| C    | -3.2833 | -1.0216 | -3.3381 |
| C    | 2.6233  | -1.6479 | 3.4418  |
| O    | 4.8597  | -0.8950 | -0.5188 |
| O    | 0.7859  | -3.4594 | -2.2371 |
| O    | -5.1597 | 0.6057  | 0.5035  |
| O    | -1.9719 | -2.8985 | 2.4289  |
| H    | 4.2628  | -1.6641 | -0.7259 |
| H    | 1.6633  | -3.3123 | -1.7990 |
| H    | -4.8102 | -0.2879 | 0.7584  |
| H    | -2.7715 | -2.5398 | 1.9655  |
| O    | 4.4615  | 3.8097  | 0.0340  |
| H    | 5.7667  | 1.4470  | -0.0708 |
| H    | -5.3579 | 3.0813  | -0.0911 |
| H    | -1.9393 | 0.9939  | -2.1238 |
| H    | -1.5510 | -3.1597 | -3.1891 |
| H    | 1.9678  | 3.4607  | -0.3595 |
| H    | 0.3542  | -3.2105 | 3.4032  |
| H    | 1.9073  | 0.5801  | 2.0759  |
| H    | -1.1314 | 3.9238  | 0.1132  |
| H    | -3.3573 | -0.2197 | -4.0826 |
| H    | -3.5478 | -1.9645 | -3.8248 |
| H    | -4.0367 | -0.8141 | -2.5676 |
| H    | 2.6042  | -2.5815 | 4.0112  |
| H    | 3.3979  | -1.7375 | 2.6695  |
| H    | 2.9348  | -0.8414 | 4.1165  |
| H    | 5.4216  | 3.7211  | 0.1453  |
| H    | -3.4579 | 4.6888  | -0.2688 |

Cartesian coordinates of **14-IV** optimized at the gas-phase B3LYP/6-31G(d) level

| atom | X       | Y       | Z       |
|------|---------|---------|---------|
| C    | -2.8998 | 0.1932  | -0.4394 |
| C    | -2.0011 | 1.2827  | -0.4807 |
| C    | -2.4668 | 2.5722  | -0.2534 |
| C    | -3.8229 | 2.8205  | 0.0305  |
| C    | -4.7064 | 1.7480  | 0.0993  |
| C    | -4.2667 | 0.4367  | -0.1305 |
| C    | -2.4448 | -1.1580 | -0.7661 |
| C    | -1.1124 | -1.3416 | -1.3149 |
| C    | -0.2038 | -0.2539 | -1.3998 |
| C    | -0.5208 | 1.0479  | -0.6971 |
| C    | -0.7480 | -2.5933 | -1.8938 |
| C    | 0.4735  | -2.7297 | -2.5609 |
| C    | 1.3251  | -1.6350 | -2.6647 |
| C    | 0.9919  | -0.3966 | -2.0847 |
| C    | 1.7366  | 1.5088  | 0.4471  |
| C    | 2.7128  | 0.4969  | 0.5959  |
| C    | 4.0618  | 0.7806  | 0.2427  |
| C    | 4.4075  | 2.0593  | -0.2160 |
| C    | 3.4481  | 3.0594  | -0.3346 |
| C    | 2.1103  | 2.7675  | -0.0064 |
| C    | 0.2764  | 1.2071  | 0.7087  |
| C    | 0.0507  | 0.0382  | 1.6417  |
| C    | 1.0325  | -0.9789 | 1.7551  |
| C    | 2.3546  | -0.8025 | 1.1580  |
| C    | -1.1346 | -0.0689 | 2.3614  |
| C    | -1.3740 | -1.1944 | 3.1635  |
| C    | -0.4469 | -2.2197 | 3.2552  |
| C    | 0.7664  | -2.1258 | 2.5567  |
| O    | -3.2389 | -2.1405 | -0.6509 |
| O    | 3.2115  | -1.7331 | 1.2067  |
| H    | -0.1742 | 2.0981  | 1.1580  |
| H    | -0.1350 | 1.8715  | -1.3063 |
| C    | -4.3092 | 4.2351  | 0.2345  |
| C    | 3.8323  | 4.4468  | -0.7884 |
| O    | -1.5476 | -3.6659 | -1.8410 |
| O    | -5.1733 | -0.5486 | -0.0498 |
| O    | 1.6428  | -3.1314 | 2.6936  |
| O    | 5.0382  | -0.1335 | 0.3349  |
| H    | -2.3662 | -3.3870 | -1.3509 |
| H    | -4.6885 | -1.3960 | -0.2317 |
| H    | 2.4372  | -2.8965 | 2.1485  |
| H    | 4.6152  | -0.9718 | 0.6550  |
| O    | 2.5128  | -1.6964 | -3.3199 |
| H    | 0.7222  | -3.6929 | -2.9980 |
| H    | -0.6220 | -3.0996 | 3.8652  |
| H    | -1.7721 | 3.4088  | -0.2969 |
| H    | -5.7575 | 1.8986  | 0.3262  |
| H    | 1.6904  | 0.4256  | -2.1834 |
| H    | 5.4466  | 2.2433  | -0.4714 |
| H    | 1.3571  | 3.5462  | -0.1093 |
| H    | -1.8791 | 0.7175  | 2.3002  |
| H    | -4.3926 | 4.7612  | -0.7256 |
| H    | -5.2943 | 4.2566  | 0.7098  |
| H    | -3.6151 | 4.8106  | 0.8574  |
| H    | 3.1084  | 4.8468  | -1.5074 |
| H    | 4.8211  | 4.4570  | -1.2562 |
| H    | 3.8600  | 5.1413  | 0.0616  |
| H    | -2.3050 | -1.2642 | 3.7198  |
| H    | 2.6434  | -2.5945 | -3.6640 |

Cartesian coordinates of **15-I** optimized at the gas-phase B3LYP/6-31G(d) level

| atom | X       | Y       | Z       |
|------|---------|---------|---------|
| C    | -0.9896 | -0.0441 | 1.9329  |
| C    | 0.1392  | 0.6858  | 1.4785  |
| C    | 1.3790  | 0.4664  | 2.0602  |
| C    | 1.5573  | -0.5153 | 3.0572  |
| C    | 0.4637  | -1.2607 | 3.4788  |
| C    | -0.8108 | -1.0353 | 2.9383  |
| C    | -2.3284 | 0.2914  | 1.4683  |
| C    | -2.5197 | 1.4847  | 0.6407  |
| C    | -1.4029 | 2.1929  | 0.1414  |
| C    | -0.0023 | 1.6486  | 0.3216  |
| C    | -3.8333 | 1.9692  | 0.3783  |
| C    | -4.0035 | 3.1574  | -0.3477 |
| C    | -2.8932 | 3.8480  | -0.8106 |
| C    | -1.5977 | 3.3709  | -0.5745 |
| C    | 2.0448  | 0.9624  | -1.0714 |
| C    | 2.7133  | -0.2539 | -0.8065 |
| C    | 4.1286  | -0.2489 | -0.6725 |
| C    | 4.8411  | 0.9456  | -0.8460 |
| C    | 4.1813  | 2.1345  | -1.1425 |
| C    | 2.7773  | 2.1311  | -1.2418 |
| C    | 0.5318  | 1.0149  | -1.0768 |
| C    | -0.1215 | -0.3121 | -1.3922 |
| C    | 0.5640  | -1.5214 | -1.0944 |
| C    | 1.9650  | -1.5083 | -0.7163 |
| C    | -1.3994 | -0.3515 | -1.9169 |
| C    | -2.0468 | -1.5895 | -2.1255 |
| C    | -1.4150 | -2.7870 | -1.8022 |
| C    | -0.1114 | -2.7596 | -1.2896 |
| O    | -3.3290 | -0.3900 | 1.8403  |
| O    | 2.5614  | -2.5813 | -0.3938 |
| H    | 0.2198  | 1.7447  | -1.8305 |
| H    | 0.6684  | 2.4974  | 0.4909  |
| C    | 2.9335  | -0.7604 | 3.6246  |
| C    | 4.9565  | 3.4090  | -1.3744 |
| O    | -4.9351 | 1.3354  | 0.8055  |
| O    | -1.8253 | -1.7724 | 3.4130  |
| O    | 0.4638  | -3.9379 | -1.0153 |
| O    | 4.8271  | -1.3571 | -0.3767 |
| H    | -4.6289 | 0.5197  | 1.2805  |
| H    | -2.6418 | -1.4798 | 2.9322  |
| H    | 1.3764  | -3.7377 | -0.6770 |
| H    | 4.1668  | -2.0953 | -0.2991 |
| H    | -5.0138 | 3.5097  | -0.5274 |
| O    | -3.2935 | -1.5006 | -2.6458 |
| H    | -1.8828 | -3.7533 | -1.9397 |
| H    | 2.2359  | 1.0464  | 1.7321  |
| H    | 0.5639  | -2.0278 | 4.2404  |
| H    | -0.7404 | 3.9243  | -0.9492 |
| H    | 5.9219  | 0.9120  | -0.7463 |
| H    | 2.2581  | 3.0633  | -1.4552 |
| H    | -1.9369 | 0.5547  | -2.1711 |
| H    | 3.3761  | 0.1682  | 4.0048  |
| H    | 3.6080  | -1.1427 | 2.8477  |
| H    | 2.9104  | -1.4877 | 4.4410  |
| H    | 5.0306  | 3.6305  | -2.4473 |
| H    | 5.9749  | 3.3368  | -0.9814 |
| H    | 4.4661  | 4.2674  | -0.9018 |
| C    | -4.0277 | -2.6997 | -2.8686 |
| H    | -4.9890 | -2.3855 | -3.2775 |
| H    | -3.5178 | -3.3510 | -3.5889 |
| H    | -4.1892 | -3.2468 | -1.9319 |
| H    | -3.0316 | 4.7730  | -1.3641 |

Cartesian coordinates of **15-II** optimized at the gas-phase B3LYP/6-31G(d) level

| atom | X       | Y       | Z       |
|------|---------|---------|---------|
| C    | 2.7229  | 0.9173  | 0.6174  |
| C    | 1.5788  | 1.7325  | 0.4623  |
| C    | 1.7177  | 3.0380  | 0.0076  |
| C    | 2.9805  | 3.5685  | -0.3177 |
| C    | 4.1058  | 2.7581  | -0.2010 |
| C    | 3.9968  | 1.4384  | 0.2577  |
| C    | 2.6061  | -0.4252 | 1.1817  |
| C    | 1.3359  | -0.8394 | 1.7723  |
| C    | 0.1834  | -0.0234 | 1.6423  |
| C    | 0.1988  | 1.1604  | 0.7019  |
| C    | 1.2793  | -2.0116 | 2.5790  |
| C    | 0.0978  | -2.3247 | 3.2680  |
| C    | -1.0033 | -1.4911 | 3.1589  |
| C    | -0.9695 | -0.3458 | 2.3499  |
| C    | 0.0649  | -0.3973 | -1.3858 |
| C    | -0.6210 | -1.6362 | -1.3059 |
| C    | -0.0036 | -2.8018 | -1.8375 |
| C    | 1.2563  | -2.7090 | -2.4479 |
| C    | 1.9062  | -1.4865 | -2.5571 |
| C    | 1.2934  | -0.3318 | -2.0277 |
| C    | -0.5144 | 0.8321  | -0.7214 |
| C    | -2.0181 | 0.7848  | -0.5461 |
| C    | -2.6942 | -0.4591 | -0.5099 |
| C    | -1.9881 | -1.6993 | -0.8006 |
| C    | -2.7191 | 1.9637  | -0.3570 |
| C    | -4.1077 | 1.9370  | -0.1162 |
| C    | -4.7926 | 0.7254  | -0.0496 |
| C    | -4.0927 | -0.4729 | -0.2438 |
| O    | 3.6194  | -1.1822 | 1.2367  |
| O    | -2.5841 | -2.8141 | -0.6941 |
| H    | -0.2761 | 1.7053  | -1.3373 |
| H    | -0.4266 | 1.9509  | 1.1288  |
| C    | 3.1073  | 5.0033  | -0.7689 |
| C    | 3.2642  | -1.3810 | -3.2065 |
| O    | 2.3253  | -2.8368 | 2.7303  |
| O    | 5.1206  | 0.7084  | 0.3355  |
| O    | -4.7946 | -1.6120 | -0.1722 |
| O    | -0.5842 | -4.0098 | -1.7943 |
| H    | 3.0656  | -2.4669 | 2.1849  |
| H    | 4.8561  | -0.1849 | 0.6781  |
| H    | -4.1484 | -2.3524 | -0.3280 |
| H    | -1.4604 | -3.8902 | -1.3445 |
| H    | 0.0827  | -3.2185 | 3.8828  |
| O    | -4.6886 | 3.1521  | 0.0414  |
| H    | -5.8563 | 0.6631  | 0.1411  |
| H    | 0.8351  | 3.6651  | -0.1013 |
| H    | 5.0941  | 3.1271  | -0.4579 |
| H    | -1.8464 | 0.2882  | 2.2737  |
| H    | 1.6988  | -3.6199 | -2.8393 |
| H    | 1.8034  | 0.6226  | -2.1150 |
| H    | -2.2241 | 2.9294  | -0.3933 |
| H    | 3.0231  | 5.6886  | 0.0848  |
| H    | 4.0724  | 5.1901  | -1.2488 |
| H    | 2.3142  | 5.2715  | -1.4759 |
| H    | 4.0230  | -1.0832 | -2.4715 |
| H    | 3.5757  | -2.3322 | -3.6472 |
| H    | 3.2673  | -0.6202 | -3.9963 |
| C    | -6.0920 | 3.2112  | 0.2712  |
| H    | -6.3344 | 4.2719  | 0.3515  |
| H    | -6.6512 | 2.7694  | -0.5625 |
| H    | -6.3655 | 2.7020  | 1.2035  |
| H    | -1.9110 | -1.7305 | 3.7067  |

Cartesian coordinates of **15-III** optimized at the gas-phase B3LYP/6-31G(d) level

| atom | X       | Y       | Z       |
|------|---------|---------|---------|
| C    | 0.2690  | -1.3237 | -1.5598 |
| C    | -0.3105 | -0.0292 | -1.5359 |
| C    | -1.5479 | 0.1817  | -2.1267 |
| C    | -2.2703 | -0.8794 | -2.7114 |
| C    | -1.7228 | -2.1557 | -2.7078 |
| C    | -0.4599 | -2.3951 | -2.1453 |
| C    | 1.6350  | -1.5352 | -1.0950 |
| C    | 2.4554  | -0.3802 | -0.7571 |
| C    | 1.8904  | 0.9176  | -0.7052 |
| C    | 0.3911  | 1.0970  | -0.8102 |
| C    | 3.8510  | -0.5314 | -0.5238 |
| C    | 4.6587  | 0.5888  | -0.2877 |
| C    | 4.0830  | 1.8580  | -0.2758 |
| C    | 2.6968  | 2.0192  | -0.4758 |
| C    | -0.2694 | 0.1004  | 1.5057  |
| C    | -1.4778 | -0.6339 | 1.6251  |
| C    | -1.4641 | -1.8782 | 2.3152  |
| C    | -0.2718 | -2.3466 | 2.8864  |
| C    | 0.8995  | -1.6054 | 2.7972  |
| C    | 0.8857  | -0.3745 | 2.1085  |
| C    | -0.2344 | 1.3586  | 0.6687  |
| C    | -1.5752 | 2.0478  | 0.5407  |
| C    | -2.7736 | 1.3138  | 0.6911  |
| C    | -2.7355 | -0.0782 | 1.1467  |
| C    | -1.6304 | 3.3955  | 0.1958  |
| C    | -2.8663 | 4.0189  | -0.0178 |
| C    | -4.0531 | 3.3091  | 0.0950  |
| C    | -4.0228 | 1.9511  | 0.4447  |
| O    | 2.1317  | -2.7026 | -1.0641 |
| O    | -3.8033 | -0.7571 | 1.2004  |
| H    | 0.4672  | 2.0640  | 1.1257  |
| H    | 0.1979  | 2.0326  | -1.3445 |
| C    | -3.6326 | -0.6180 | -3.3055 |
| C    | 2.1878  | -2.1111 | 3.3977  |
| O    | 4.4472  | -1.7326 | -0.5178 |
| O    | 0.0162  | -3.6477 | -2.1978 |
| O    | -5.1936 | 1.3006  | 0.5313  |
| O    | -2.5611 | -2.6350 | 2.4603  |
| H    | 3.7353  | -2.4012 | -0.7094 |
| H    | 0.9068  | -3.6337 | -1.7614 |
| H    | -4.9812 | 0.3659  | 0.7905  |
| H    | -3.3007 | -2.1603 | 2.0016  |
| O    | 4.7733  | 3.0069  | -0.0721 |
| H    | 5.7162  | 0.4235  | -0.1266 |
| H    | -5.0180 | 3.7746  | -0.0769 |
| H    | -1.9789 | 1.1782  | -2.1299 |
| H    | -2.2517 | -2.9972 | -3.1445 |
| H    | 2.2878  | 3.0244  | -0.4432 |
| H    | -0.2975 | -3.3006 | 3.4038  |
| H    | 1.8031  | 0.2018  | 2.0380  |
| H    | -0.7107 | 3.9654  | 0.0918  |
| H    | -3.5949 | 0.1955  | -4.0399 |
| H    | -4.0345 | -1.5067 | -3.8003 |
| H    | -4.3430 | -0.3138 | -2.5262 |
| H    | 2.0305  | -3.0212 | 3.9836  |
| H    | 2.9179  | -2.3373 | 2.6100  |
| H    | 2.6435  | -1.3571 | 4.0506  |
| C    | 6.1807  | 2.9306  | 0.1265  |
| H    | 6.6826  | 2.4888  | -0.7428 |
| H    | 6.5172  | 3.9601  | 0.2574  |
| H    | 6.4263  | 2.3489  | 1.0235  |
| H    | -2.8971 | 5.0737  | -0.2782 |

Cartesian coordinates of **15-IV** optimized at the gas-phase B3LYP/6-31G(d) level

| atom | X       | Y       | Z       |
|------|---------|---------|---------|
| C    | -2.9689 | -0.0728 | -0.5423 |
| C    | -2.1700 | 1.0787  | -0.7226 |
| C    | -2.7645 | 2.3347  | -0.7561 |
| C    | -4.1547 | 2.4901  | -0.6009 |
| C    | -4.9420 | 1.3616  | -0.3952 |
| C    | -4.3714 | 0.0813  | -0.3632 |
| C    | -2.3727 | -1.4078 | -0.5978 |
| C    | -0.9917 | -1.5469 | -1.0233 |
| C    | -0.1782 | -0.4024 | -1.2450 |
| C    | -0.6622 | 0.9611  | -0.8028 |
| C    | -0.4727 | -2.8320 | -1.3507 |
| C    | 0.8044  | -2.9633 | -1.9119 |
| C    | 1.5623  | -1.8222 | -2.1581 |
| C    | 1.0702  | -0.5419 | -1.8219 |
| C    | 1.4501  | 1.8285  | 0.3791  |
| C    | 2.4944  | 0.9548  | 0.7594  |
| C    | 3.8375  | 1.3038  | 0.4442  |
| C    | 4.1079  | 2.5153  | -0.2070 |
| C    | 3.0787  | 3.3836  | -0.5560 |
| C    | 1.7493  | 3.0231  | -0.2636 |
| C    | 0.0052  | 1.4343  | 0.5999  |
| C    | -0.1901 | 0.4219  | 1.7064  |
| C    | 0.8625  | -0.4636 | 2.0513  |
| C    | 2.2060  | -0.2621 | 1.5136  |
| C    | -1.4121 | 0.3243  | 2.3635  |
| C    | -1.6152 | -0.6700 | 3.3318  |
| C    | -0.6147 | -1.5727 | 3.6531  |
| C    | 0.6350  | -1.4809 | 3.0218  |
| O    | -3.0843 | -2.4309 | -0.3599 |
| O    | 3.1329  | -1.0845 | 1.7737  |
| H    | -0.5542 | 2.3394  | 0.8577  |
| H    | -0.3041 | 1.7045  | -1.5223 |
| C    | -4.7789 | 3.8626  | -0.6792 |
| C    | 3.3769  | 4.7055  | -1.2211 |
| O    | -1.1750 | -3.9563 | -1.1585 |
| O    | -5.1907 | -0.9620 | -0.1637 |
| O    | 1.5804  | -2.3609 | 3.3824  |
| O    | 4.8776  | 0.5153  | 0.7517  |
| H    | -2.0510 | -3.6831 | -0.7763 |
| H    | -4.6199 | -1.7749 | -0.1645 |
| H    | 2.3911  | -2.1441 | 2.8542  |
| H    | 4.5025  | -0.2934 | 1.1872  |
| O    | 2.7953  | -1.8307 | -2.7177 |
| H    | 1.1509  | -3.9609 | -2.1493 |
| H    | -0.7604 | -2.3517 | 4.3941  |
| H    | -2.1455 | 3.2171  | -0.9062 |
| H    | -6.0165 | 1.4420  | -0.2610 |
| H    | 1.7011  | 0.3159  | -2.0226 |
| H    | 5.1441  | 2.7536  | -0.4267 |
| H    | 0.9430  | 3.6965  | -0.5473 |
| H    | -2.2127 | 1.0156  | 2.1239  |
| H    | -4.8398 | 4.2049  | -1.7206 |
| H    | -5.7935 | 3.8661  | -0.2703 |
| H    | -4.1857 | 4.6033  | -0.1311 |
| H    | 2.6750  | 4.9086  | -2.0378 |
| H    | 4.3921  | 4.7308  | -1.6276 |
| H    | 3.2855  | 5.5322  | -0.5044 |
| C    | 3.3780  | -3.0819 | -3.0661 |
| H    | 2.7754  | -3.6068 | -3.8175 |
| H    | 4.3574  | -2.8453 | -3.4843 |
| H    | 3.5010  | -3.7222 | -2.1843 |
| H    | -2.5757 | -0.7346 | 3.8360  |

Cartesian coordinates of **16-I** optimized at the gas-phase B3LYP/6-31G(d) level

| atom | X       | Y       | Z       |
|------|---------|---------|---------|
| C    | 1.0918  | -0.4381 | 1.8293  |
| C    | -0.0888 | -1.0356 | 1.3165  |
| C    | -1.2908 | -0.8678 | 1.9883  |
| C    | -1.3771 | -0.0691 | 3.1476  |
| C    | -0.2319 | 0.5490  | 3.6330  |
| C    | 1.0048  | 0.3732  | 2.9951  |
| C    | 2.3916  | -0.7426 | 1.2479  |
| C    | 2.4903  | -1.7927 | 0.2308  |
| C    | 1.3209  | -2.3695 | -0.3144 |
| C    | -0.0412 | -1.7987 | 0.0131  |
| C    | 3.7670  | -2.2792 | -0.1717 |
| C    | 3.8500  | -3.3431 | -1.0820 |
| C    | 2.6891  | -3.9102 | -1.5877 |
| C    | 1.4289  | -3.4271 | -1.2137 |
| C    | -2.0855 | -0.7708 | -1.1504 |
| C    | -2.6565 | 0.4323  | -0.6756 |
| C    | -4.0637 | 0.4963  | -0.4742 |
| C    | -4.8642 | -0.6104 | -0.7884 |
| C    | -4.3009 | -1.7802 | -1.2890 |
| C    | -2.9048 | -1.8507 | -1.4553 |
| C    | -0.5823 | -0.9158 | -1.2415 |
| C    | 0.1460  | 0.3993  | -1.3896 |
| C    | -0.4330 | 1.5976  | -0.8874 |
| C    | -1.8230 | 1.6090  | -0.4371 |
| C    | 1.4028  | 0.4569  | -1.9680 |
| C    | 2.1181  | 1.6659  | -2.0308 |
| C    | 1.5890  | 2.8372  | -1.5073 |
| C    | 0.2916  | 2.8143  | -0.9282 |
| O    | 3.4386  | -0.1710 | 1.6731  |
| O    | -2.3291 | 2.6519  | 0.0723  |
| H    | -0.3553 | -1.5404 | -2.1117 |
| H    | -0.7511 | -2.6305 | 0.0705  |
| C    | -2.7110 | 0.1207  | 3.8269  |
| C    | -5.1709 | -2.9540 | -1.6681 |
| O    | 4.9149  | -1.7607 | 0.2899  |
| O    | 2.0724  | 0.9796  | 3.5335  |
| O    | -0.1882 | 3.9736  | -0.4636 |
| O    | -4.6724 | 1.5877  | 0.0155  |
| H    | 4.6666  | -1.0246 | 0.9080  |
| H    | 2.8517  | 0.7457  | 2.9670  |
| H    | -1.0925 | 3.7792  | -0.1058 |
| H    | -3.9616 | 2.2621  | 0.1751  |
| H    | -2.1884 | -1.3474 | 1.6100  |
| H    | -0.2615 | 1.1752  | 4.5192  |
| H    | 4.8339  | -3.7016 | -1.3659 |
| H    | 2.7599  | -4.7420 | -2.2838 |
| H    | 0.5311  | -3.8813 | -1.6254 |
| H    | -5.9352 | -0.5238 | -0.6320 |
| H    | -2.4609 | -2.7714 | -1.8288 |
| H    | 1.8540  | -0.4409 | -2.3770 |
| H    | 3.0988  | 1.6709  | -2.4925 |
| H    | -2.6158 | 0.7045  | 4.7468  |
| H    | -3.4128 | 0.6430  | 3.1644  |
| H    | -3.1669 | -0.8443 | 4.0795  |
| H    | -6.1684 | -2.8745 | -1.2259 |
| H    | -4.7264 | -3.9020 | -1.3447 |
| H    | -5.2948 | -3.0111 | -2.7575 |
| O    | 2.1992  | 4.0513  | -1.5034 |
| C    | 3.5061  | 4.1387  | -2.0475 |
| H    | 3.5177  | 3.8785  | -3.1147 |
| H    | 3.8088  | 5.1801  | -1.9269 |
| H    | 4.2103  | 3.4898  | -1.5099 |



Cartesian coordinates of **16-II** optimized at the gas-phase B3LYP/6-31G(d) level

| atom | X       | Y       | Z       |
|------|---------|---------|---------|
| C    | 2.8765  | 0.7315  | 0.6422  |
| C    | 1.8273  | 1.6653  | 0.4831  |
| C    | 2.1092  | 2.9516  | 0.0396  |
| C    | 3.4244  | 3.3463  | -0.2707 |
| C    | 4.4556  | 2.4196  | -0.1497 |
| C    | 4.2023  | 1.1161  | 0.2983  |
| C    | 2.6117  | -0.5939 | 1.1966  |
| C    | 1.2990  | -0.8736 | 1.7727  |
| C    | 0.2416  | 0.0622  | 1.6384  |
| C    | 0.3922  | 1.2430  | 0.7070  |
| C    | 1.1091  | -2.0394 | 2.5683  |
| C    | -0.1071 | -2.2308 | 3.2416  |
| C    | -1.1118 | -1.2836 | 3.1287  |
| C    | -0.9470 | -0.1417 | 2.3309  |
| C    | 0.1126  | -0.2694 | -1.3979 |
| C    | -0.6929 | -1.4358 | -1.3260 |
| C    | -0.1899 | -2.6551 | -1.8613 |
| C    | 1.0731  | -2.6828 | -2.4713 |
| C    | 1.8396  | -1.5294 | -2.5727 |
| C    | 1.3428  | -0.3229 | -2.0366 |
| C    | -0.3444 | 1.0047  | -0.7236 |
| C    | -1.8449 | 1.1043  | -0.5623 |
| C    | -2.6500 | -0.0625 | -0.5298 |
| C    | -2.0577 | -1.3714 | -0.8202 |
| C    | -2.4466 | 2.3388  | -0.3770 |
| C    | -3.8282 | 2.4463  | -0.1489 |
| C    | -4.6302 | 1.3131  | -0.0926 |
| C    | -4.0412 | 0.0348  | -0.2817 |
| O    | 3.5379  | -1.4553 | 1.2552  |
| O    | -2.7540 | -2.4234 | -0.7129 |
| H    | -0.0118 | 1.8556  | -1.3273 |
| H    | -0.1487 | 2.0935  | 1.1343  |
| C    | 3.7081  | 4.7622  | -0.7101 |
| C    | 3.2016  | -1.5533 | -3.2215 |
| O    | 2.0596  | -2.9723 | 2.7231  |
| O    | 5.2413  | 0.2704  | 0.3820  |
| O    | -4.8542 | -1.0268 | -0.2216 |
| O    | -0.8836 | -3.8013 | -1.8227 |
| H    | 2.8415  | -2.6788 | 2.1891  |
| H    | 4.8800  | -0.5917 | 0.7162  |
| H    | -4.2805 | -1.8240 | -0.3675 |
| H    | -1.7425 | -3.6020 | -1.3688 |
| H    | 1.2993  | 3.6697  | -0.0717 |
| H    | 5.4802  | 2.6829  | -0.3945 |
| H    | -0.2243 | -3.1228 | 3.8478  |
| H    | -2.0461 | -1.4294 | 3.6643  |
| H    | -1.7509 | 0.5822  | 2.2518  |
| H    | 1.4249  | -3.6306 | -2.8669 |
| H    | 1.9461  | 0.5762  | -2.1156 |
| H    | -1.8474 | 3.2454  | -0.4081 |
| H    | -4.2660 | 3.4296  | -0.0185 |
| H    | 3.6908  | 5.4471  | 0.1479  |
| H    | 4.6918  | 4.8475  | -1.1810 |
| H    | 2.9546  | 5.1185  | -1.4215 |
| H    | 3.9837  | -1.3149 | -2.4895 |
| H    | 3.4273  | -2.5335 | -3.6508 |
| H    | 3.2721  | -0.8053 | -4.0206 |
| O    | -5.9718 | 1.3024  | 0.1291  |
| C    | -6.6243 | 2.5480  | 0.3092  |
| H    | -6.5240 | 3.1884  | -0.5775 |
| H    | -7.6779 | 2.3118  | 0.4666  |
| H    | -6.2372 | 3.0841  | 1.1865  |

Cartesian coordinates of **16-III** optimized at the gas-phase B3LYP/6-31G(d) level

| atom | X       | Y       | Z       |
|------|---------|---------|---------|
| C    | -1.4554 | -0.6893 | 1.6265  |
| C    | -0.3394 | 0.1800  | 1.5142  |
| C    | 0.8638  | -0.1657 | 2.1113  |
| C    | 1.0197  | -1.3937 | 2.7878  |
| C    | -0.0583 | -2.2658 | 2.8688  |
| C    | -1.2973 | -1.9313 | 2.3030  |
| C    | -2.7696 | -0.2758 | 1.1567  |
| C    | -2.9671 | 1.1072  | 0.7143  |
| C    | -1.8598 | 1.9732  | 0.5676  |
| C    | -0.4492 | 1.4408  | 0.6882  |
| C    | -4.2814 | 1.6006  | 0.4758  |
| C    | -4.4668 | 2.9490  | 0.1375  |
| C    | -3.3683 | 3.7894  | 0.0273  |
| C    | -2.0691 | 3.3087  | 0.2331  |
| C    | -0.3797 | 0.0859  | -1.5359 |
| C    | 0.3287  | -1.1435 | -1.5754 |
| C    | -0.2895 | -2.2764 | -2.1753 |
| C    | -1.5676 | -2.1572 | -2.7413 |
| C    | -2.2398 | -0.9420 | -2.7321 |
| C    | -1.6300 | 0.1781  | -2.1291 |
| C    | 0.2039  | 1.2657  | -0.7922 |
| C    | 1.7121  | 1.2366  | -0.6932 |
| C    | 2.4152  | 0.0072  | -0.7567 |
| C    | 1.7061  | -1.2266 | -1.1087 |
| C    | 2.4209  | 2.4029  | -0.4536 |
| C    | 3.8118  | 2.3799  | -0.2596 |
| C    | 4.5142  | 1.1812  | -0.2888 |
| C    | 3.8134  | -0.0287 | -0.5361 |
| O    | -3.7531 | -1.0724 | 1.2062  |
| O    | 2.3125  | -2.3382 | -1.0862 |
| H    | -0.0866 | 2.1841  | -1.3129 |
| H    | 0.1682  | 2.2174  | 1.1510  |
| C    | 2.3578  | -1.7517 | 3.3859  |
| C    | -3.6176 | -0.8099 | -3.3327 |
| O    | -5.3703 | 0.8206  | 0.5594  |
| O    | -2.2999 | -2.8107 | 2.4405  |
| O    | 4.5308  | -1.1601 | -0.5485 |
| O    | 0.3070  | -3.4751 | -2.2400 |
| H    | -5.0523 | -0.0864 | 0.8091  |
| H    | -3.0908 | -2.4185 | 1.9896  |
| H    | 3.8880  | -1.8927 | -0.7397 |
| H    | 1.1897  | -3.3816 | -1.7984 |
| H    | 1.7096  | 0.5117  | 2.0457  |
| H    | 0.0265  | -3.2215 | 3.3767  |
| H    | -3.5196 | 4.8359  | -0.2246 |
| H    | -1.2205 | 3.9804  | 0.1312  |
| H    | -2.0082 | -3.0421 | -3.1900 |
| H    | -2.1599 | 1.1257  | -2.1193 |
| H    | 1.8997  | 3.3560  | -0.4110 |
| H    | 4.3351  | 3.3130  | -0.0844 |
| H    | 2.7172  | -0.9593 | 4.0534  |
| H    | 3.1130  | -1.8748 | 2.5991  |
| H    | 2.3091  | -2.6834 | 3.9565  |
| H    | -3.6495 | -0.0026 | -4.0744 |
| H    | -4.3558 | -0.5636 | -2.5589 |
| H    | -3.9354 | -1.7353 | -3.8213 |
| O    | 5.8539  | 1.0431  | -0.1006 |
| C    | 6.6151  | 2.2142  | 0.1429  |
| H    | 6.2905  | 2.7237  | 1.0604  |
| H    | 7.6466  | 1.8788  | 0.2621  |
| H    | 6.5570  | 2.9169  | -0.6993 |
| H    | -5.4789 | 3.3033  | -0.0286 |

Cartesian coordinates of **16-IV** optimized at the gas-phase B3LYP/6-31G(d) level

| atom | X       | Y       | Z       |
|------|---------|---------|---------|
| C    | -2.5944 | -1.1292 | 0.5149  |
| C    | -1.5235 | -1.9683 | 0.1314  |
| C    | -1.7763 | -3.1102 | -0.6191 |
| C    | -3.0825 | -3.4479 | -1.0202 |
| C    | -4.1364 | -2.6095 | -0.6698 |
| C    | -3.9136 | -1.4541 | 0.0912  |
| C    | -2.3601 | 0.0239  | 1.3805  |
| C    | -1.0510 | 0.1886  | 2.0071  |
| C    | 0.0281  | -0.6602 | 1.6513  |
| C    | -0.0975 | -1.5860 | 0.4626  |
| C    | -0.8866 | 1.1284  | 3.0648  |
| C    | 0.3273  | 1.1800  | 3.7666  |
| C    | 1.3542  | 0.3138  | 3.4285  |
| C    | 1.2136  | -0.6032 | 2.3765  |
| C    | 2.1370  | -1.1216 | -0.7193 |
| C    | 2.9206  | 0.0154  | -0.4167 |
| C    | 4.3150  | -0.1498 | -0.1814 |
| C    | 4.8938  | -1.4220 | -0.2847 |
| C    | 4.1229  | -2.5333 | -0.6114 |
| C    | 2.7404  | -2.3697 | -0.8176 |
| C    | 0.6350  | -1.0000 | -0.8648 |
| C    | 0.1691  | 0.3904  | -1.2295 |
| C    | 0.9578  | 1.5237  | -0.8877 |
| C    | 2.3232  | 1.3489  | -0.3961 |
| C    | -1.0473 | 0.5906  | -1.8608 |
| C    | -1.5224 | 1.8866  | -2.1279 |
| C    | -0.7883 | 3.0060  | -1.7620 |
| C    | 0.4759  | 2.8325  | -1.1371 |
| O    | -3.3085 | 0.8174  | 1.6526  |
| O    | 3.0139  | 2.3476  | -0.0385 |
| H    | 0.3197  | -1.6895 | -1.6548 |
| H    | 0.4557  | -2.5053 | 0.6807  |
| C    | -3.3326 | -4.7148 | -1.8021 |
| C    | 4.7594  | -3.8932 | -0.7674 |
| O    | -1.8595 | 1.9704  | 3.4423  |
| O    | -4.9750 | -0.6914 | 0.3936  |
| O    | 1.1607  | 3.9407  | -0.8327 |
| O    | 5.1186  | 0.8751  | 0.1385  |
| H    | -2.6377 | 1.7936  | 2.8541  |
| H    | -4.6321 | 0.0755  | 0.9223  |
| H    | 2.0110  | 3.6400  | -0.4199 |
| H    | 4.5458  | 1.6846  | 0.1788  |
| H    | -0.9502 | -3.7588 | -0.9037 |
| H    | -5.1558 | -2.8311 | -0.9710 |
| H    | 2.2866  | 0.3469  | 3.9858  |
| H    | 2.0341  | -1.2669 | 2.1262  |
| H    | 5.9612  | -1.5101 | -0.1059 |
| H    | 2.1339  | -3.2401 | -1.0601 |
| H    | -1.6536 | -0.2598 | -2.1540 |
| H    | -2.4795 | 2.0019  | -2.6237 |
| H    | -3.2840 | -5.5937 | -1.1460 |
| H    | -2.5795 | -4.8560 | -2.5856 |
| H    | -4.3199 | -4.7081 | -2.2731 |
| H    | 4.9306  | -4.1236 | -1.8273 |
| H    | 5.7268  | -3.9444 | -0.2591 |
| H    | 4.1171  | -4.6844 | -0.3651 |
| O    | -1.1592 | 4.2981  | -1.9603 |
| C    | -2.4195 | 4.5418  | -2.5632 |
| H    | -2.4674 | 4.1302  | -3.5805 |
| H    | -3.2400 | 4.1232  | -1.9652 |
| H    | -2.5219 | 5.6273  | -2.6084 |
| H    | 0.4249  | 1.8995  | 4.5727  |

Cartesian coordinates of **17-I** optimized at the gas-phase B3LYP/6-31G(d) level

| atom | X       | Y       | Z       |
|------|---------|---------|---------|
| C    | -0.6492 | -0.7018 | 1.9273  |
| C    | 0.2176  | 0.3654  | 1.5787  |
| C    | 1.4795  | 0.4420  | 2.1500  |
| C    | 1.9459  | -0.5544 | 3.0319  |
| C    | 1.1159  | -1.6224 | 3.3475  |
| C    | -0.1789 | -1.7089 | 2.8149  |
| C    | -2.0384 | -0.7096 | 1.4815  |
| C    | -2.5734 | 0.4602  | 0.7979  |
| C    | -1.7169 | 1.5163  | 0.4103  |
| C    | -0.2154 | 1.3814  | 0.5459  |
| C    | -3.9756 | 0.5776  | 0.5603  |
| C    | -4.5175 | 1.7331  | -0.0285 |
| C    | -3.6332 | 2.7634  | -0.3706 |
| C    | -2.2493 | 2.6599  | -0.1629 |
| C    | 1.9171  | 1.4803  | -0.8841 |
| C    | 2.9034  | 0.4738  | -0.7817 |
| C    | 4.2647  | 0.8554  | -0.6284 |
| C    | 4.6118  | 2.2134  | -0.6248 |
| C    | 3.6401  | 3.2001  | -0.7613 |
| C    | 2.2904  | 2.8189  | -0.8794 |
| C    | 0.4501  | 1.1085  | -0.9103 |
| C    | 0.1881  | -0.2941 | -1.4101 |
| C    | 1.1846  | -1.2947 | -1.2725 |
| C    | 2.5359  | -0.9397 | -0.8763 |
| C    | -1.0425 | -0.6221 | -1.9505 |
| C    | -1.3154 | -1.9499 | -2.3221 |
| C    | -0.3820 | -2.9796 | -2.1612 |
| C    | 0.8768  | -2.6397 | -1.6367 |
| O    | -2.7933 | -1.6920 | 1.7595  |
| O    | 3.4183  | -1.8345 | -0.6945 |
| H    | -0.0666 | 1.8143  | -1.5685 |
| H    | 0.1851  | 2.3596  | 0.8314  |
| C    | 3.3421  | -0.4591 | 3.5962  |
| C    | 4.0229  | 4.6598  | -0.8022 |
| O    | -4.8261 | -0.4059 | 0.8951  |
| O    | -0.9334 | -2.7543 | 3.1862  |
| O    | 1.7807  | -3.6241 | -1.5072 |
| O    | 5.2522  | -0.0424 | -0.4797 |
| H    | -4.2735 | -1.1401 | 1.2793  |
| H    | -1.8080 | -2.6503 | 2.7295  |
| H    | 2.6045  | -3.2086 | -1.1345 |
| H    | 4.8256  | -0.9388 | -0.5093 |
| H    | 2.1303  | 1.2757  | 1.9054  |
| H    | 1.4419  | -2.4102 | 4.0196  |
| H    | -1.6194 | 3.4931  | -0.4596 |
| H    | 5.6615  | 2.4691  | -0.5158 |
| H    | 1.5269  | 3.5892  | -0.9683 |
| H    | -1.8191 | 0.1211  | -2.0881 |
| H    | 3.5418  | -1.2573 | 4.3168  |
| H    | 4.0891  | -0.5299 | 2.7954  |
| H    | 3.5011  | 0.5028  | 4.0986  |
| H    | 5.0360  | 4.8206  | -0.4218 |
| H    | 3.3326  | 5.2708  | -0.2098 |
| H    | 3.9905  | 5.0426  | -1.8308 |
| C    | -6.0008 | 1.8616  | -0.2772 |
| H    | -6.4458 | 2.6856  | 0.2995  |
| H    | -6.2244 | 2.0361  | -1.3396 |
| H    | -6.5136 | 0.9453  | 0.0172  |
| C    | -0.7097 | -4.4006 | -2.5505 |
| H    | -0.9215 | -4.4950 | -3.6255 |
| H    | 0.1314  | -5.0575 | -2.3261 |
| H    | -1.5810 | -4.7847 | -2.0008 |
| O    | -2.5485 | -2.1812 | -2.8453 |
| H    | -2.6386 | -3.1245 | -3.0535 |
| O    | -4.0723 | 3.9234  | -0.9303 |
| H    | -5.0380 | 3.8925  | -1.0178 |

Cartesian coordinates of **17-II** optimized at the gas-phase B3LYP/6-31G(d) level

| atom | X       | Y       | Z       |
|------|---------|---------|---------|
| C    | -2.9032 | 0.4743  | -0.7814 |
| C    | -1.9168 | 1.4808  | -0.8838 |
| C    | -2.2901 | 2.8194  | -0.8791 |
| C    | -3.6397 | 3.2007  | -0.7609 |
| C    | -4.6115 | 2.2141  | -0.6243 |
| C    | -4.2644 | 0.8560  | -0.6278 |
| C    | -2.5359 | -0.9392 | -0.8762 |
| C    | -1.1846 | -1.2943 | -1.2726 |
| C    | -0.1880 | -0.2938 | -1.4100 |
| C    | -0.4500 | 1.1088  | -0.9101 |
| C    | -0.8770 | -2.6392 | -1.6371 |
| C    | 0.3818  | -2.9791 | -2.1615 |
| C    | 1.3153  | -1.9495 | -2.3222 |
| C    | 1.0426  | -0.6218 | -1.9505 |
| C    | -0.2176 | 0.3650  | 1.5787  |
| C    | 0.6491  | -0.7023 | 1.9271  |
| C    | 0.1785  | -1.7098 | 2.8140  |
| C    | -1.1165 | -1.6237 | 3.3461  |
| C    | -1.9464 | -0.5556 | 3.0307  |
| C    | -1.4797 | 0.4414  | 2.1497  |
| C    | 0.2156  | 1.3814  | 0.5463  |
| C    | 1.7171  | 1.5162  | 0.4108  |
| C    | 2.5735  | 0.4601  | 0.7983  |
| C    | 2.0385  | -0.7099 | 1.4818  |
| C    | 2.2495  | 2.6599  | -0.1622 |
| C    | 3.6334  | 2.7633  | -0.3700 |
| C    | 4.5177  | 1.7329  | -0.0280 |
| C    | 3.9757  | 0.5774  | 0.5607  |
| O    | -3.4183 | -1.8340 | -0.6946 |
| O    | 2.7932  | -1.6924 | 1.7592  |
| H    | -0.1849 | 2.3595  | 0.8320  |
| H    | 0.0669  | 1.8147  | -1.5680 |
| C    | -4.0222 | 4.6605  | -0.8012 |
| C    | -3.3430 | -0.4607 | 3.5942  |
| O    | -1.7809 | -3.6235 | -1.5077 |
| O    | -5.2520 | -0.0417 | -0.4789 |
| O    | 4.8262  | -0.4061 | 0.8953  |
| O    | 0.9330  | -2.7553 | 3.1853  |
| H    | -2.6047 | -3.2080 | -1.1351 |
| H    | -4.8255 | -0.9381 | -0.5089 |
| H    | 4.2737  | -1.1403 | 1.2797  |
| H    | 1.8078  | -2.6508 | 2.7293  |
| H    | -1.5265 | 3.5896  | -0.9681 |
| H    | -5.6611 | 2.4698  | -0.5152 |
| H    | 1.8192  | 0.1214  | -2.0880 |
| H    | -1.4427 | -2.4119 | 4.0177  |
| H    | -2.1303 | 1.2753  | 1.9053  |
| H    | 1.6196  | 3.4931  | -0.4588 |
| H    | -5.0389 | 4.8202  | -0.4299 |
| H    | -3.3376 | 5.2696  | -0.2001 |
| H    | -3.9797 | 5.0465  | -1.8281 |
| H    | -3.5423 | -1.2582 | 4.3158  |
| H    | -4.0895 | -0.5334 | 2.7931  |
| H    | -3.5033 | 0.5017  | 4.0951  |
| C    | 0.7093  | -4.4001 | -2.5511 |
| H    | 0.9223  | -4.4940 | -3.6259 |
| H    | 1.5799  | -4.7849 | -2.0006 |
| H    | -0.1323 | -5.0567 | -2.3279 |
| C    | 6.0010  | 1.8614  | -0.2766 |
| H    | 6.4456  | 2.6862  | 0.2991  |
| H    | 6.5139  | 0.9456  | 0.0190  |
| H    | 6.2248  | 2.0345  | -1.3392 |
| O    | 4.0726  | 3.9232  | -0.9296 |
| H    | 5.0382  | 3.8922  | -1.0175 |
| O    | 2.5484  | -2.1809 | -2.8454 |
| H    | 2.6384  | -3.1242 | -3.0536 |

Cartesian coordinates of **17-III** optimized at the gas-phase B3LYP/6-31G(d) level

| atom | X       | Y       | Z       |
|------|---------|---------|---------|
| C    | 0.8978  | -1.2186 | -1.6162 |
| C    | -0.0300 | -0.1495 | -1.5282 |
| C    | -1.2816 | -0.2742 | -2.1131 |
| C    | -1.6746 | -1.4677 | -2.7529 |
| C    | -0.7833 | -2.5313 | -2.8111 |
| C    | 0.5009  | -2.4248 | -2.2567 |
| C    | 2.2731  | -1.0496 | -1.1610 |
| C    | 2.7329  | 0.2749  | -0.7632 |
| C    | 1.8164  | 1.3449  | -0.6463 |
| C    | 0.3277  | 1.0927  | -0.7444 |
| C    | 4.1195  | 0.5171  | -0.5331 |
| C    | 4.5910  | 1.8069  | -0.2344 |
| C    | 3.6496  | 2.8419  | -0.1628 |
| C    | 2.2776  | 2.6187  | -0.3553 |
| C    | 0.0300  | -0.1492 | 1.5279  |
| C    | -0.8978 | -1.2184 | 1.6162  |
| C    | -0.5007 | -2.4245 | 2.2569  |
| C    | 0.7837  | -2.5309 | 2.8109  |
| C    | 1.6749  | -1.4673 | 2.7525  |
| C    | 1.2817  | -0.2739 | 2.1126  |
| C    | -0.3278 | 1.0928  | 0.7440  |
| C    | -1.8164 | 1.3449  | 0.6459  |
| C    | -2.7329 | 0.2750  | 0.7634  |
| C    | -2.2732 | -1.0495 | 1.1613  |
| C    | -2.2778 | 2.6187  | 0.3545  |
| C    | -3.6499 | 2.8417  | 0.1623  |
| C    | -4.5912 | 1.8066  | 0.2343  |
| C    | -4.1196 | 0.5171  | 0.5336  |
| O    | 3.0822  | -2.0276 | -1.1901 |
| O    | -3.0826 | -2.0271 | 1.1908  |
| H    | 0.1324  | 1.9592  | 1.2299  |
| H    | -0.1325 | 1.9590  | -1.2304 |
| C    | -3.0614 | -1.5813 | -3.3368 |
| C    | 3.0618  | -1.5807 | 3.3361  |
| O    | 5.0214  | -0.4776 | -0.5911 |
| O    | 1.3154  | -3.4844 | -2.3709 |
| O    | -5.0213 | -0.4778 | 0.5927  |
| O    | -1.3150 | -3.4842 | 2.3713  |
| H    | 4.5145  | -1.3053 | -0.8182 |
| H    | 2.1695  | -3.2369 | -1.9319 |
| H    | -4.5141 | -1.3054 | 0.8196  |
| H    | -2.1692 | -3.2368 | 1.9324  |
| C    | 6.0600  | 2.0684  | -0.0054 |
| C    | -6.0603 | 2.0680  | 0.0056  |
| H    | -1.9804 | 0.5556  | -2.0677 |
| H    | -1.0528 | -3.4672 | -3.2908 |
| H    | 1.6003  | 3.4629  | -0.2702 |
| H    | 1.0533  | -3.4668 | 3.2907  |
| H    | 1.9804  | 0.5560  | 2.0670  |
| H    | -1.6005 | 3.4629  | 0.2690  |
| H    | -3.2714 | -0.7521 | -4.0232 |
| H    | -3.8192 | -1.5419 | -2.5438 |
| H    | -3.1937 | -2.5192 | -3.8837 |
| H    | 3.2719  | -0.7516 | 4.0225  |
| H    | 3.8194  | -1.5412 | 2.5429  |
| H    | 3.1944  | -2.5186 | 3.8829  |
| H    | 6.4715  | 2.7756  | -0.7403 |
| H    | 6.2543  | 2.4762  | 0.9971  |
| H    | 6.6270  | 1.1412  | -0.0960 |
| H    | -6.4734 | 2.7695  | 0.7450  |
| H    | -6.2539 | 2.4827  | -0.9942 |
| H    | -6.6262 | 1.1395  | 0.0888  |
| O    | -4.0192 | 4.1229  | -0.1078 |
| H    | -4.9831 | 4.1659  | -0.2083 |
| O    | 4.0187  | 4.1231  | 0.1075  |
| H    | 4.9827  | 4.1662  | 0.2083  |

Cartesian coordinates of **17-IV** optimized at the gas-phase B3LYP/6-31G(d) level

| atom | X       | Y       | Z       |
|------|---------|---------|---------|
| C    | 2.7148  | 0.6005  | 0.8585  |
| C    | 1.8011  | 1.6659  | 0.6944  |
| C    | 2.2700  | 2.9430  | 0.4119  |
| C    | 3.6468  | 3.2023  | 0.2748  |
| C    | 4.5488  | 2.1522  | 0.4105  |
| C    | 4.1053  | 0.8537  | 0.6986  |
| C    | 2.2441  | -0.7300 | 1.2430  |
| C    | 0.8601  | -0.9009 | 1.6511  |
| C    | -0.0638 | 0.1695  | 1.5325  |
| C    | 0.3102  | 1.4080  | 0.7500  |
| C    | 0.4504  | -2.1069 | 2.2946  |
| C    | -0.8367 | -2.2360 | 2.8438  |
| C    | -1.6961 | -1.1366 | 2.7430  |
| C    | -1.3232 | 0.0528  | 2.0935  |
| C    | -1.8010 | 1.6659  | -0.6944 |
| C    | -2.7148 | 0.6006  | -0.8585 |
| C    | -4.1053 | 0.8537  | -0.6985 |
| C    | -4.5487 | 2.1523  | -0.4105 |
| C    | -3.6467 | 3.2024  | -0.2748 |
| C    | -2.2699 | 2.9430  | -0.4119 |
| C    | -0.3101 | 1.4080  | -0.7501 |
| C    | 0.0638  | 0.1695  | -1.5326 |
| C    | -0.8601 | -0.9009 | -1.6511 |
| C    | -2.2441 | -0.7299 | -1.2429 |
| C    | 1.3232  | 0.0528  | -2.0935 |
| C    | 1.6961  | -1.1366 | -2.7431 |
| C    | 0.8367  | -2.2360 | -2.8438 |
| C    | -0.4505 | -2.1069 | -2.2946 |
| O    | 3.0634  | -1.6983 | 1.2998  |
| O    | -3.0634 | -1.6983 | -1.2997 |
| H    | 0.1647  | 2.2730  | -1.2242 |
| H    | -0.1647 | 2.2730  | 1.2241  |
| C    | 4.1315  | 4.6064  | 0.0050  |
| C    | -4.1314 | 4.6064  | -0.0051 |
| O    | 1.2836  | -3.1532 | 2.4143  |
| O    | 5.0324  | -0.1085 | 0.8182  |
| O    | -1.2836 | -3.1532 | -2.4143 |
| O    | -5.0323 | -0.1084 | -0.8181 |
| H    | 2.1441  | -2.8810 | 1.9941  |
| H    | 4.5429  | -0.9519 | 1.0028  |
| H    | -2.1441 | -2.8810 | -1.9941 |
| H    | -4.5429 | -0.9519 | -1.0027 |
| C    | -1.2683 | -3.5065 | 3.5350  |
| C    | 1.2682  | -3.5066 | -3.5350 |
| H    | 1.5618  | 3.7611  | 0.2958  |
| H    | 5.6173  | 2.3106  | 0.3005  |
| H    | -2.0466 | 0.8580  | 2.0409  |
| H    | -5.6172 | 2.3107  | -0.3005 |
| H    | -1.5617 | 3.7611  | -0.2958 |
| H    | 2.0466  | 0.8580  | -2.0410 |
| H    | 4.0775  | 5.2196  | 0.9141  |
| H    | 3.5165  | 5.1022  | -0.7545 |
| H    | 5.1703  | 4.6136  | -0.3379 |
| H    | -4.0772 | 5.2197  | -0.9141 |
| H    | -5.1703 | 4.6137  | 0.3377  |
| H    | -3.5165 | 5.1022  | 0.7546  |
| H    | -1.5088 | -3.3369 | 4.5946  |
| H    | -2.1519 | -3.9538 | 3.0573  |
| H    | -0.4687 | -4.2471 | 3.4980  |
| H    | 2.1521  | -3.9536 | -3.0576 |
| H    | 1.5083  | -3.3371 | -4.5946 |
| H    | 0.4688  | -4.2474 | -3.4975 |
| O    | 2.9489  | -1.1608 | -3.2691 |
| H    | 3.1111  | -2.0259 | -3.6772 |
| O    | -2.9490 | -1.1608 | 3.2690  |
| H    | -3.1112 | -2.0259 | 3.6771  |

Cartesian coordinates of 5-chlorinated 1-I optimized at the gas-phase B3LYP/6-31G(d) level

| atom | X       | Y       | Z       |
|------|---------|---------|---------|
| C    | 1.1496  | -1.2524 | -1.3799 |
| C    | 0.2131  | -0.1878 | -1.3864 |
| C    | -0.9863 | -0.3328 | -2.0664 |
| C    | -1.3209 | -1.5428 | -2.7106 |
| C    | -0.4222 | -2.6014 | -2.6780 |
| C    | 0.8134  | -2.4750 | -2.0267 |
| C    | 2.4763  | -1.0621 | -0.8211 |
| C    | 2.9035  | 0.2874  | -0.4249 |
| C    | 1.9654  | 1.3510  | -0.4004 |
| C    | 0.4927  | 1.0678  | -0.5945 |
| C    | 4.2750  | 0.5292  | -0.1364 |
| C    | 4.7038  | 1.8369  | 0.1379  |
| C    | 3.7947  | 2.8790  | 0.1292  |
| C    | 2.4405  | 2.6350  | -0.1324 |
| C    | -1.7584 | 1.2495  | 0.6245  |
| C    | -2.6275 | 0.1351  | 0.6798  |
| C    | -3.9962 | 0.3089  | 0.3338  |
| C    | -4.4720 | 1.5816  | -0.0092 |
| C    | -3.6197 | 2.6815  | -0.0259 |
| C    | -2.2575 | 2.4997  | 0.2823  |
| C    | -0.2724 | 1.0651  | 0.8453  |
| C    | 0.0734  | -0.1441 | 1.6836  |
| C    | -0.8039 | -1.2578 | 1.7159  |
| C    | -2.1388 | -1.1654 | 1.1280  |
| C    | 1.2658  | -0.1903 | 2.3979  |
| C    | 1.6162  | -1.3446 | 3.1144  |
| C    | 0.7940  | -2.4593 | 3.1231  |
| C    | -0.4247 | -2.4314 | 2.4274  |
| O    | 3.2955  | -2.0248 | -0.7594 |
| O    | -2.8959 | -2.1794 | 1.0896  |
| H    | 0.1086  | 1.9584  | 1.3479  |
| H    | 0.0493  | 1.9169  | -1.1200 |
| C    | -2.6584 | -1.6775 | -3.3950 |
| C    | -4.1439 | 4.0584  | -0.3539 |
| O    | 5.1976  | -0.4407 | -0.1179 |
| O    | 1.6412  | -3.5284 | -2.0544 |
| O    | -1.1970 | -3.5257 | 2.4815  |
| O    | -4.8692 | -0.7113 | 0.3152  |
| H    | 4.7244  | -1.2895 | -0.3266 |
| H    | 2.4548  | -3.2707 | -1.5516 |
| H    | -2.0094 | -3.3319 | 1.9471  |
| H    | -4.3656 | -1.5219 | 0.5873  |
| H    | -1.6929 | 0.4911  | -2.0910 |
| H    | -0.6486 | -3.5482 | -3.1585 |
| H    | 5.7550  | 2.0049  | 0.3462  |
| H    | 4.1230  | 3.8943  | 0.3255  |
| H    | -5.5242 | 1.6810  | -0.2580 |
| H    | -1.5844 | 3.3525  | 0.2479  |
| H    | 2.5504  | -1.3648 | 3.6693  |
| H    | 1.0559  | -3.3619 | 3.6652  |
| H    | -2.7428 | -2.6248 | -3.9350 |
| H    | -3.4731 | -1.6313 | -2.6609 |
| H    | -2.8223 | -0.8602 | -4.1075 |
| H    | -5.1265 | 4.0115  | -0.8325 |
| H    | -3.4612 | 4.5968  | -1.0207 |
| H    | -4.2469 | 4.6625  | 0.5570  |
| Cl   | 1.3601  | 4.0353  | -0.1270 |
| H    | 1.9290  | 0.6685  | 2.4022  |



Cartesian coordinates of 5-chlorinated 1-II optimized at the gas-phase B3LYP/6-31G(d) level

| atom | X       | Y       | Z       |
|------|---------|---------|---------|
| C    | 2.6645  | 0.3931  | 0.4948  |
| C    | 1.8166  | 1.4949  | 0.2446  |
| C    | 2.3470  | 2.6752  | -0.2584 |
| C    | 3.7236  | 2.7963  | -0.5321 |
| C    | 4.5572  | 1.7020  | -0.3190 |
| C    | 4.0475  | 0.4970  | 0.1829  |
| C    | 2.1278  | -0.8215 | 1.0966  |
| C    | 0.7860  | -0.7883 | 1.6862  |
| C    | -0.0485 | 0.3482  | 1.4904  |
| C    | 0.3214  | 1.3445  | 0.4151  |
| C    | 0.3981  | -1.8236 | 2.5786  |
| C    | -0.7916 | -1.6915 | 3.3125  |
| C    | -1.5568 | -0.5493 | 3.1830  |
| C    | -1.1880 | 0.4650  | 2.2842  |
| C    | -0.1144 | -0.4389 | -1.4563 |
| C    | -1.1340 | -1.4011 | -1.2396 |
| C    | -0.8607 | -2.7696 | -1.5109 |
| C    | 0.3964  | -3.1456 | -2.0100 |
| C    | 1.3760  | -2.1942 | -2.2605 |
| C    | 1.1031  | -0.8364 | -1.9886 |
| C    | -0.3423 | 0.9955  | -1.0399 |
| C    | -1.7976 | 1.4063  | -1.0768 |
| C    | -2.8141 | 0.4396  | -0.8971 |
| C    | -2.4810 | -0.9843 | -0.8662 |
| C    | -2.1374 | 2.7441  | -1.2437 |
| C    | -3.4811 | 3.1385  | -1.2079 |
| C    | -4.4919 | 2.2132  | -0.9960 |
| C    | -4.1738 | 0.8563  | -0.8342 |
| O    | 2.8526  | -1.8525 | 1.2104  |
| O    | -3.3747 | -1.8454 | -0.6151 |
| H    | 0.2085  | 1.6498  | -1.7227 |
| H    | -0.0984 | 2.3197  | 0.6710  |
| C    | 4.2830  | 4.1047  | -1.0350 |
| C    | 2.7360  | -2.5911 | -2.7789 |
| O    | 1.1299  | -2.9261 | 2.7805  |
| O    | 4.9007  | -0.5271 | 0.3459  |
| O    | -5.1835 | -0.0045 | -0.6408 |
| O    | -1.7679 | -3.7376 | -1.3203 |
| H    | 1.9370  | -2.8464 | 2.2090  |
| H    | 4.3723  | -1.2862 | 0.7024  |
| H    | -4.7787 | -0.9051 | -0.5474 |
| H    | -2.5875 | -3.2988 | -0.9740 |
| H    | 1.6907  | 3.5226  | -0.4444 |
| H    | 5.6197  | 1.7541  | -0.5360 |
| H    | -1.0722 | -2.4873 | 3.9939  |
| H    | -2.4557 | -0.4237 | 3.7773  |
| H    | 0.5723  | -4.1997 | -2.2010 |
| H    | 1.8718  | -0.0953 | -2.1847 |
| H    | -3.7364 | 4.1859  | -1.3461 |
| H    | -5.5364 | 2.5044  | -0.9571 |
| H    | 4.3532  | 4.8364  | -0.2196 |
| H    | 5.2853  | 3.9789  | -1.4546 |
| H    | 3.6399  | 4.5434  | -1.8063 |
| H    | 3.5064  | -2.3942 | -2.0223 |
| H    | 2.7769  | -3.6535 | -3.0350 |
| H    | 3.0056  | -2.0124 | -3.6705 |
| Cl   | -2.1941 | 1.9113  | 2.2690  |
| H    | -1.3579 | 3.4861  | -1.3961 |

Cartesian coordinates of 5-chlorinated **1-III** optimized at the gas-phase B3LYP/6-31G(d) level

| atom | X       | Y       | Z       |
|------|---------|---------|---------|
| C    | 4.3959  | 2.3959  | -0.4612 |
| C    | 3.3824  | 3.3434  | -0.4752 |
| C    | 2.0427  | 2.9664  | -0.6374 |
| C    | 1.7095  | 1.6253  | -0.8045 |
| C    | 2.7294  | 0.6459  | -0.8260 |
| C    | 4.0837  | 1.0391  | -0.6302 |
| C    | 0.2549  | 1.2133  | -0.8714 |
| C    | 0.0279  | -0.1213 | -1.5424 |
| C    | 1.0573  | -1.0975 | -1.5377 |
| C    | 2.4035  | -0.7553 | -1.0992 |
| C    | -1.1992 | -0.4199 | -2.1159 |
| C    | -1.4677 | -1.6978 | -2.6501 |
| C    | -0.4757 | -2.6691 | -2.6152 |
| C    | 0.7872  | -2.3880 | -2.0720 |
| C    | -0.3904 | 1.2692  | 0.6265  |
| C    | -1.8983 | 1.3231  | 0.5343  |
| C    | -2.6608 | 0.1404  | 0.7105  |
| C    | -2.0096 | -1.0914 | 1.1794  |
| C    | -0.6404 | -1.0322 | 1.6583  |
| C    | 0.1233  | 0.1524  | 1.5038  |
| C    | -0.0845 | -2.1257 | 2.3799  |
| C    | 1.1920  | -2.0071 | 2.9488  |
| C    | 1.9213  | -0.8315 | 2.8226  |
| C    | 1.3705  | 0.2491  | 2.1010  |
| C    | -2.5775 | 2.4949  | 0.2001  |
| C    | -3.9660 | 2.5131  | 0.0176  |
| C    | -4.7043 | 1.3508  | 0.1501  |
| C    | -4.0655 | 0.1496  | 0.4924  |
| O    | 3.3053  | -1.6422 | -1.0367 |
| O    | -2.6733 | -2.1671 | 1.2491  |
| C    | -2.8319 | -1.9973 | -3.2206 |
| C    | 3.3024  | -0.7056 | 3.4158  |
| O    | 5.0937  | 0.1552  | -0.5956 |
| O    | 1.7033  | -3.3660 | -2.0936 |
| O    | -4.8254 | -0.9496 | 0.5964  |
| O    | -0.7395 | -3.2814 | 2.5565  |
| H    | 4.6930  | -0.7415 | -0.7393 |
| H    | 2.5253  | -2.9995 | -1.6774 |
| H    | -4.2177 | -1.6933 | 0.8532  |
| H    | -1.6090 | -3.1959 | 2.0902  |
| H    | -0.2920 | 1.9831  | -1.4233 |
| H    | -0.0354 | 2.2212  | 1.0277  |
| Cl   | -1.7218 | 4.0289  | -0.0013 |
| H    | 5.4365  | 2.6713  | -0.3250 |
| H    | 3.6319  | 4.3943  | -0.3546 |
| H    | -1.9760 | 0.3382  | -2.1459 |
| H    | -0.6473 | -3.6648 | -3.0121 |
| H    | 1.5874  | -2.8600 | 3.4915  |
| H    | 1.9451  | 1.1646  | 1.9994  |
| H    | -4.4564 | 3.4480  | -0.2325 |
| H    | -5.7786 | 1.3429  | 0.0005  |
| H    | -3.1208 | -1.2500 | -3.9692 |
| H    | -2.8653 | -2.9839 | -3.6911 |
| H    | -3.5942 | -1.9727 | -2.4312 |
| H    | 4.0566  | -0.6278 | 2.6221  |
| H    | 3.5551  | -1.5683 | 4.0385  |
| H    | 3.3887  | 0.1988  | 4.0297  |
| H    | 1.2605  | 3.7197  | -0.6297 |

Cartesian coordinates of 5-chlorinated **1-IV** optimized at the gas-phase B3LYP/6-31G(d) level

| atom | X       | Y       | Z       |
|------|---------|---------|---------|
| C    | 0.6853  | -2.8593 | -2.7690 |
| C    | 1.5208  | -1.7634 | -2.9056 |
| C    | 1.1936  | -0.5261 | -2.3297 |
| C    | 0.0117  | -0.3795 | -1.6116 |
| C    | -0.8813 | -1.4752 | -1.5018 |
| C    | -0.5261 | -2.7304 | -2.0700 |
| C    | -0.3108 | 0.9219  | -0.9125 |
| C    | -1.7960 | 1.1652  | -0.7622 |
| C    | -2.6855 | 0.0686  | -0.6740 |
| C    | -2.2160 | -1.2877 | -0.9315 |
| C    | -2.2815 | 2.4603  | -0.6626 |
| C    | -3.6508 | 2.7113  | -0.4469 |
| C    | -4.5248 | 1.6375  | -0.3217 |
| C    | -4.0635 | 0.3172  | -0.4272 |
| C    | 0.4493  | 1.0836  | 0.5252  |
| C    | 0.2795  | -0.1168 | 1.4294  |
| C    | 1.2388  | -1.1663 | 1.3630  |
| C    | 2.5243  | -0.9426 | 0.6933  |
| C    | 2.8772  | 0.4088  | 0.2758  |
| C    | 1.9007  | 1.4298  | 0.2752  |
| C    | 4.2138  | 0.7272  | -0.0906 |
| C    | 4.5498  | 2.0505  | -0.4082 |
| C    | 3.5899  | 3.0575  | -0.3813 |
| C    | 2.2606  | 2.7311  | -0.0477 |
| C    | -0.7905 | -0.2674 | 2.3099  |
| C    | -0.9766 | -1.4556 | 3.0349  |
| C    | -0.0929 | -2.5086 | 2.9043  |
| C    | 1.0366  | -2.3758 | 2.0808  |
| O    | -2.9883 | -2.2771 | -0.7653 |
| O    | 3.3620  | -1.8837 | 0.5856  |
| C    | -4.1510 | 4.1319  | -0.3468 |
| C    | 3.9641  | 4.4873  | -0.6872 |
| O    | -1.3144 | -3.8111 | -1.9853 |
| O    | -4.9627 | -0.6702 | -0.3078 |
| O    | 1.8910  | -3.4049 | 2.0333  |
| O    | 5.1850  | -0.1963 | -0.1447 |
| H    | -2.1210 | -3.5393 | -1.4755 |
| H    | -4.4670 | -1.5229 | -0.4107 |
| H    | 2.6372  | -3.1340 | 1.4375  |
| H    | 4.7680  | -1.0653 | 0.0861  |
| H    | 0.1060  | 1.7444  | -1.5019 |
| H    | -0.0362 | 1.9474  | 0.9850  |
| Cl   | -1.9294 | 1.0386  | 2.6315  |
| H    | 0.9291  | -3.8245 | -3.2002 |
| H    | 2.4472  | -1.8635 | -3.4647 |
| H    | -1.5938 | 3.2996  | -0.7452 |
| H    | -5.5851 | 1.7926  | -0.1476 |
| H    | 5.5808  | 2.2636  | -0.6737 |
| H    | 1.5059  | 3.5147  | -0.0407 |
| H    | -1.8280 | -1.5363 | 3.7024  |
| H    | -0.2317 | -3.4359 | 3.4494  |
| H    | -3.7026 | 4.6473  | 0.5119  |
| H    | -3.8846 | 4.7079  | -1.2415 |
| H    | -5.2379 | 4.1688  | -0.2316 |
| H    | 3.9933  | 5.0873  | 0.2317  |
| H    | 4.9493  | 4.5531  | -1.1579 |
| H    | 3.2325  | 4.9570  | -1.3545 |
| H    | 1.8663  | 0.3172  | -2.4433 |
